# Supplementary material
Source: publisher figshare collection journal article supplement (https://karger.figshare.com/ndownloader/files/15471827)
Supplement: Supplementary file 1 [file 15471827]

## Appendix to “A BMI-based Cross-classification Approach for the Assessment of Prognostic Factors in Chronic Kidney Disease Progression”

This appendix provides further methodological detail, results, discussion, references, supplementary figures, and supplementary tables for the main paper.

### CONTENTS

|                                          |                                                                                                                                                                                                                                                                                                                                                                                                                                                                                                                                                                                                     | Page |
|------------------------------------------|-----------------------------------------------------------------------------------------------------------------------------------------------------------------------------------------------------------------------------------------------------------------------------------------------------------------------------------------------------------------------------------------------------------------------------------------------------------------------------------------------------------------------------------------------------------------------------------------------------|------|
| <a href="#">Research in context</a>      | <a href="#">Evidence before this study</a> , <a href="#">Added value of this study</a> , <a href="#">Implications of all available evidence</a>                                                                                                                                                                                                                                                                                                                                                                                                                                                     | 3    |
| <a href="#">Supplementary Results</a>    | <a href="#">Characteristics of diabetic patients in the subcohort of “BMI &lt; 25, Age ≥ 65”</a><br><a href="#">Characteristics of e24hUK in correlation diagrams</a><br><a href="#">Supplementary analyses</a><br><a href="#">Supplementary analyses of PP×HR and e24hUK (representative cut-off values and DOR)</a>                                                                                                                                                                                                                                                                               | 4    |
| <a href="#">Supplementary Discussion</a> | <a href="#">Primary analyses regarding e24hUK</a><br><a href="#">Supplementary analyses</a>                                                                                                                                                                                                                                                                                                                                                                                                                                                                                                         | 5    |
| <a href="#">Supplementary References</a> | References of Supplementary Discussion                                                                                                                                                                                                                                                                                                                                                                                                                                                                                                                                                              | 5    |
| <a href="#">Appendix Fig. 1</a>          | Flow chart of patient selection                                                                                                                                                                                                                                                                                                                                                                                                                                                                                                                                                                     | 6    |
| <a href="#">Appendix Fig. 2</a>          | Kaplan–Meier survival curves for renal prognosis stratified by sex, age, CKD stage, and diabetes mellitus (DM) in BMI-based two stratified subcohorts                                                                                                                                                                                                                                                                                                                                                                                                                                               | 7    |
| <a href="#">Appendix Fig. 3</a>          | Kaplan–Meier survival curves for renal prognosis stratified by sex, age, CKD stage, and DM in body mass index (BMI)-based four cross-classified subcohorts<br><br><a href="#">Appendix Fig. 3A: Kaplan–Meier survival curves for renal prognosis stratified by sex</a><br><a href="#">Appendix Fig. 3B: Kaplan–Meier survival curves for renal prognosis stratified by age</a><br><a href="#">Appendix Fig. 3C: Kaplan–Meier survival curves for renal prognosis stratified by CKD stage</a><br><a href="#">Appendix Fig. 3D: Kaplan–Meier survival curves for renal prognosis stratified by DM</a> | 8    |
| <a href="#">Appendix Fig. 4</a>          | Diagnostic odds ratios of CKD stage 4–5 according to subcohort                                                                                                                                                                                                                                                                                                                                                                                                                                                                                                                                      | 13   |
| <a href="#">Appendix Fig. 5</a>          | Relationship between the estimated 24-hour urinary potassium excretion (e24hUK) with baseline variables.                                                                                                                                                                                                                                                                                                                                                                                                                                                                                            | 14   |
| <a href="#">Appendix Fig. 6</a>          | Receiver operating characteristic (ROC) analyses to identify the optimal cut-off values in total cohort for predicting renal outcome,<br>Kaplan–Meier survival curves stratified by the cut-off value in the total cohort                                                                                                                                                                                                                                                                                                                                                                           | 15   |
| <a href="#">Appendix Fig. 7</a>          | Kaplan–Meier survival curves for renal prognosis stratified by the cut-off values of renal prognostic predictors in total cohort, in BMI-based two stratified subcohorts                                                                                                                                                                                                                                                                                                                                                                                                                            | 17   |

|                                  |                                                                                                                                                                                                                                                                                                                                                                                                                                                                                                                                                                                                                           |    |
|----------------------------------|---------------------------------------------------------------------------------------------------------------------------------------------------------------------------------------------------------------------------------------------------------------------------------------------------------------------------------------------------------------------------------------------------------------------------------------------------------------------------------------------------------------------------------------------------------------------------------------------------------------------------|----|
| <a href="#">Appendix Fig. 8</a>  | Kaplan–Meier survival curves for renal prognosis stratified by the cut-off values of renal prognostic predictors in total cohort, in total cohort and in BMI-based four cross-classified subcohorts                                                                                                                                                                                                                                                                                                                                                                                                                       | 19 |
| <a href="#">Appendix Fig. 9</a>  | Diagnostic odds ratios and the cut-off values according to subcohort                                                                                                                                                                                                                                                                                                                                                                                                                                                                                                                                                      | 37 |
| <a href="#">Appendix Table 1</a> | Baseline patient characteristics of subcohorts stratified by BMI                                                                                                                                                                                                                                                                                                                                                                                                                                                                                                                                                          | 41 |
| <a href="#">Appendix Table 2</a> | Baseline patient characteristics of subcohorts stratified by conventional attributes (sex, age, CKD stage, and DM)<br><br><a href="#">Appendix Table 2A: Characteristics of subcohorts stratified by sex and age</a><br><a href="#">Appendix table 2B: Characteristics of subcohorts stratified by CKD stage and DM</a>                                                                                                                                                                                                                                                                                                   | 44 |
| <a href="#">Appendix Table 3</a> | Baseline patient characteristics of subcohorts cross-classified by BMI categories and conventional attributes (sex, age, CKD stage, and DM).<br><br><a href="#">Appendix Table 3A: Characteristics of subcohorts cross-classified by sex and BMI</a><br><a href="#">Appendix Table 3B: Characteristics of subcohorts cross-classified by age and BMI</a><br><a href="#">Appendix Table 3C: Characteristics of subcohorts cross-classified by CKD stage and BMI</a><br><a href="#">Appendix Table 3D: Characteristics of subcohorts cross-classified by DM and BMI</a>                                                     | 50 |
| <a href="#">Appendix Table 4</a> | Baseline patient characteristics for the assessment of elderly non-obese patients with DM                                                                                                                                                                                                                                                                                                                                                                                                                                                                                                                                 | 62 |
| <a href="#">Appendix Table 5</a> | Predictive characteristics of subcohorts for $\geq 50\%$ eGFR decline or ESRD                                                                                                                                                                                                                                                                                                                                                                                                                                                                                                                                             | 65 |
| <a href="#">Appendix Table 6</a> | Multivariate analysis for prognostic predictors associated with $\geq 50\%$ eGFR decline or ESRD in subcohorts stratified by BMI                                                                                                                                                                                                                                                                                                                                                                                                                                                                                          | 68 |
| <a href="#">Appendix Table 7</a> | Multivariate analysis for prognostic predictors associated with $\geq 50\%$ eGFR decline or ESRD in subcohorts cross-classified by BMI categories and conventional attributes (sex, age, CKD stage, and DM).<br><br><a href="#">Appendix Table 7A: Cox analyses in subcohorts cross-classified by sex and BMI</a><br><a href="#">Appendix Table 7B: Cox analyses in subcohorts cross-classified by age and BMI</a><br><a href="#">Appendix Table 7C: Cox analyses in subcohorts cross-classified by CKD stage and BMI</a><br><a href="#">Appendix Table 7D: Cox analyses in subcohorts cross-classified by DM and BMI</a> | 69 |
| <a href="#">Appendix Table 8</a> | Predictive characteristics of prognostic factors based on the cut-off values in respective cohorts for $\geq 50\%$ eGFR decline or ESRD                                                                                                                                                                                                                                                                                                                                                                                                                                                                                   | 72 |

## **Research in context**

### **Evidence before this study**

Stratification analysis with one attribute is commonly performed in conventional subgroup analyses, but there have been few reports on cross-classification analysis using multiple attributes. As a prognostic factor, body mass index (BMI), which has a non-linear association with kidney outcome, is an ideal attribute for cross classification. We searched the terms “cross-classification”, “body mass index” and “chronic kidney disease” on PubMed databases with no language restrictions but found no matching published original research articles.

### **Added value of this study**

Cross-classification is a method that improves subgroup analysis by adding secondary attributes to the conventional attributes. In medical settings where a variety of individuals are being treated, investigations based on cross-classification that can assess multiple attributes simultaneously can produce results that closely reflect real clinical experiences. Cross-classification is expected to be a useful method in the practice of patient-centered medicine. The BMI-based cross-classification method is based on the ideology of Oriental medicine of treating according to a patient’s body size, so it provides a link between Oriental medicine and Western medicine. To the best of our knowledge, this is the first study to conduct a detailed investigation of prognostic factors associated with chronic kidney disease (CKD) progression using BMI-based cross-classification.

### **Implications of all available evidence**

Although currently used clinical practice guidelines for renal anemia and serum phosphorous have no set target serum hemoglobin and phosphate values according to the cross-classification of sex and BMI, our BMI-based cross-classification showed differences in cut-off values for serum hemoglobin and phosphorous. Evidence of treatment in elderly patients with diabetes is deficient, especially in terms of glucose lowering. Our cross-classification method demonstrated that BMI should be considered in the treatment of elderly diabetic patients with CKD. Decreased urinary potassium excretion has been reported as a risk factor for CKD progression in patients with CKD stages 1–3, but there have been few reports on patients with CKD stages 4–5. In the present study, decreased urinary potassium excretion was detected as a prognostic factor in a “BMI < 25, CKD stages 4–5” cohort. Currently used clinical practice guidelines for CKD patients with hypertension do not consider PP × HR. The present study identified PP × HR, which reflects pulsatile stress as a prognostic predictor for CKD progression. These results indicate that there may be a substantial benefit associated with a change in clinical practice guidelines for CKD patients by using BMI-based cross-classification.

## Supplementary Results

### Characteristics of diabetic patients in the subcohort of “BMI < 25, Age ≥ 65”

Relating to diabetic patients in the subcohort of “BMI < 25, Age ≥ 65”, who showed similar Kaplan–Meier survival curve to those of Non-DM patients, the characteristics at baseline of the subcohorts stratified by age = 65 years in the cohort of “BMI < 25, DM” and that stratified by BMI = 25 kg/m<sup>2</sup> in the cohort of “Age ≥ 65 years, DM” are shown in Appendix Tables ([Appendix Table 4](#)). In the subcohort of “BMI < 25, although their baseline HbA1c (6.54% vs 6.59%) and prognostic factors including eGFR (27.6 vs 27.3 ml/min/1.73m<sup>2</sup>) were not significantly different with young DM patients, elderly DM patients had lower urinary albumin excretion (UACR: 513.3 vs 921.8 mg/g Cre) and had higher renal survival rate (4 years survival rate: 70.7% vs 56.1%) than young DM patients (Fig. 9B).

### Characteristics of e24hUK in correlation diagrams

As shown in [Appendix Fig. 5](#), an e24hUK was significantly positively correlated with eGFR ( $r = 0.33$ ,  $p < 0.0001$ ) and BMI ( $r = 0.28$ ,  $p < 0.0001$ ), slightly negatively correlated with age, and slightly positively correlated with SBP.

### Supplementary analyses

With consideration for accessibility in clinical settings, the prognostic predictors identified in the final Cox regression analyses model were dichotomized using cut-off values determined by time- ROC curves. The prognostic effects of CKD progression were confirmed using the Kaplan–Meier method ([Appendix Figs. 7–8](#)) and DOR ([Appendix Fig. 9](#), [Appendix Table 8](#)) for all cohorts.

The cut-off values for the total cohort were utilized in the Kaplan–Meier analyses ([Appendix Figs. 7–8](#)), while those for the subcohorts were utilized in the DOR analyses ([Appendix Fig. 9](#)). Representative cut-off values according to the ROC curve were 10.6 (female, BMI <25), 11.2 (female, BMI ≥25), 11.7 (male, BMI <25), and 12.8 (male, BMI ≥25) for hemoglobin (g/dL) ([Appendix Fig. 9C, left side](#)); and 4.0 (female) and 3.5 (male) for phosphorus (mg/dL) ([Appendix Fig. 9C, right side](#)).

### Supplementary analyses of PP×HR and e24hUK (representative cut-off values and DOR)

In the total cohort, the cut-off value of PP × HR and e24hUK was 4216 mmHg-bpm (DOR, 2.38) and 36.8 mEq/day (DOR, 1.79), respectively ([Appendix Fig. 9A](#)). DOR of PP × HR had a maximum of 3.58 at the cut-off value of 4253 mmHg-bpm in the “BMI < 25, CKD Stage 3” subcohort ([Appendix Fig. 9A, left side](#)). The DOR of e24hUK had a maximum of 2.60 at the cut-off value of 36.7 mEq/day in the “BMI < 25, CKD stages 4–5” subcohort ([Appendix Fig. 9A, right side](#)).

## Supplementary Discussion:

### Primary analyses regarding e24hUK

Although the e24hUK cut-off value of 36.8 mEq/day determined in the present study is similar to that used in previous studies, interpretations should be made cautiously, owing to the small AUC. Nonetheless, e24hUK was identified as a prognostic factor in the “BMI <25, CKD stages 4–5” subcohort (Fig. 15, top right), with a cut-off value of 39.1 mEq/day, which corresponds to 1.53 g/day ([Appendix Fig. 9A, right side](#)). Reportedly, a diet rich in fruits and leafy green vegetables is associated with better renal outcomes [1], and the Kidney Disease Outcomes Quality Initiative recommends a dietary potassium intake of 2–4 g/day in patients with CKD stages 3–4 [2]. Decreased urinary potassium excretion has been reported as a risk factor for CKD progression in patients with CKD stages 1–3 [1, 3]; however, reports on patients with CKD stages 4–5 are lacking. As the present study is observational in nature, the results must be interpreted carefully. Nevertheless, there is a possibility that low urinary potassium levels are a marker of poor nutritional status, renal tubular function, or excessive dietary restrictions. The results of the present study indicate that patients with CKD and low urinary potassium excretion should be treated carefully.

### Supplementary analyses

From a clinical point of view, our BMI-based cross-classification analysis demonstrated differences in the appropriate cut-off values for renal prognostic factors. Especially, the difference in the hemoglobin cut-off value between males with BMI  $\geq 25$  (12.8 g/dL) and females with BMI <25 (10.6 g/dL) was impressive ([Appendix Fig. 9C, left side](#)). Generally, obese patients have high hemoglobin, but it remains unclear whether renal anemia should be treated in obese CKD patients with high hemoglobin. Similarly, the difference in the serum phosphorus cut-off value between males (3.5 mg/dL) and females (4.0 mg/dL) was impressive ([Appendix Fig. 9C, right side](#)). Females generally have higher serum phosphorus; thus, it may be necessary to set control targets according to sex. Current clinical practice guidelines for renal anemia [4, 5] and serum phosphorous [6] do not set any targets according to the cross-classification of sex and BMI. Further prospective investigations are expected for the evaluation of hemoglobin and phosphorous in patients with CKD.

### Supplementary References

- 1 Dunkler D, Dehghan M, Teo KK, Heinze G, Gao P, Kohl M, Clase CM, Mann JF, Yusuf S, Oberbauer R: Diet and kidney disease in high-risk individuals with type 2 diabetes mellitus. JAMA internal medicine 2013;173:1682-1692.
- 2 KDOQI Clinical Practice Guideline for Diabetes and CKD: 2012 Update. Am J Kidney Dis 2012;60:850-886.
- 3 Smyth A, Dunkler D, Gao P, Teo KK, Yusuf S, O'Donnell MJ, Mann JF, Clase CM: The relationship between estimated sodium and potassium excretion and subsequent renal outcomes. Kidney international 2014;86:1205-1212.
- 4 Chapter 1: Diagnosis and evaluation of anemia in CKD. Kidney international supplements 2012;2:288-291.
- 5 Drueke TB, Parfrey PS: Summary of the KDIGO guideline on anemia and comment: reading between the (guide)line(s). Kidney international 2012;82:952-960.
- 6 KDIGO clinical practice guideline for the diagnosis, evaluation, prevention, and treatment of Chronic Kidney Disease-Mineral and Bone Disorder (CKD-MBD). Kidney international Supplement 2009:S1-130.

Appendix Fig. 1: Flow chart of patient selection

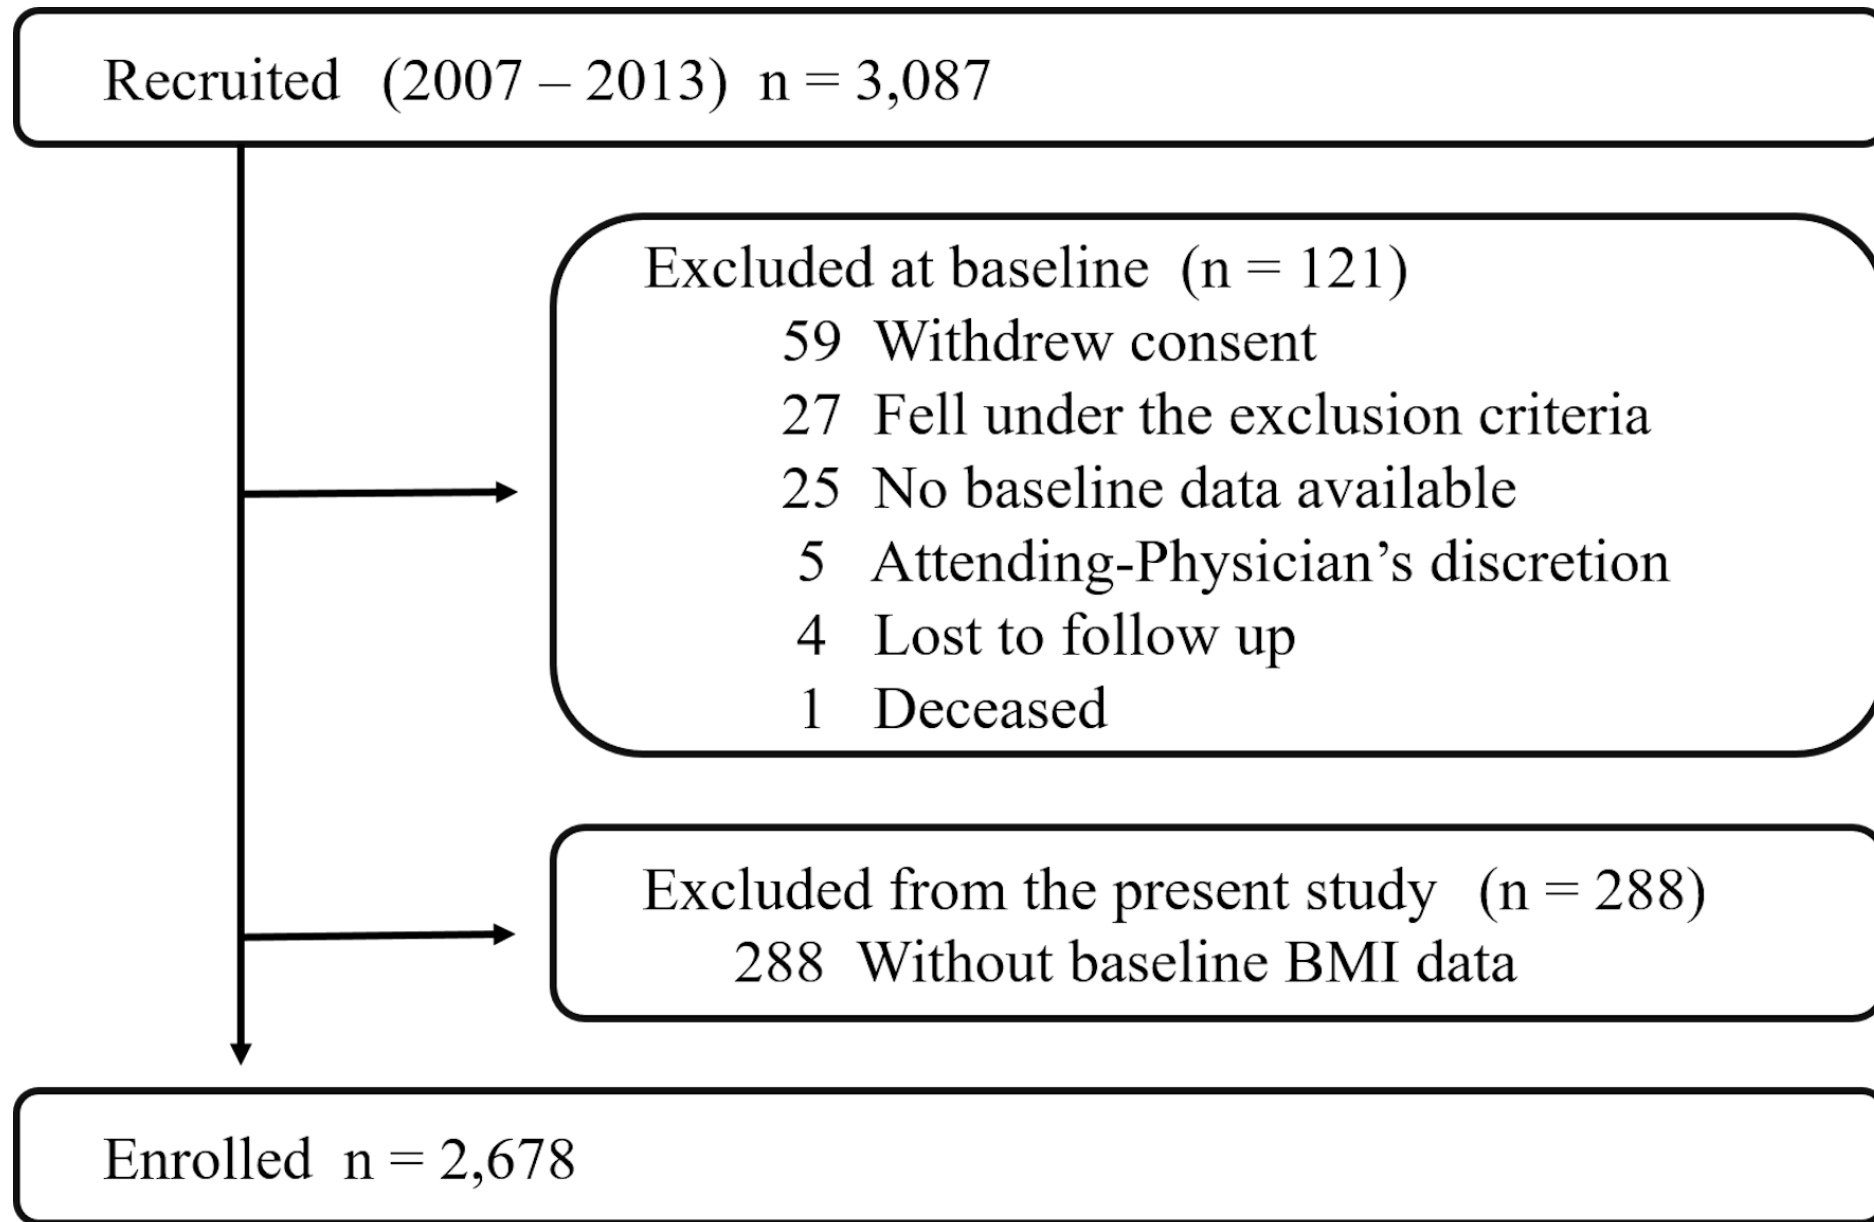

**Appendix Fig. 2: Kaplan–Meier survival curves for renal prognosis stratified by sex, age, CKD stage, and DM in BMI-based two stratified subcohorts (Upper side: BMI < 25 kg/m<sup>2</sup>, Lower side: BMI ≥ 25 kg/m<sup>2</sup>)**  
 BMI = body mass index. eGFR = estimated glomerular filtration rate. CKD = chronic kidney disease. DM = diabetes mellitus.

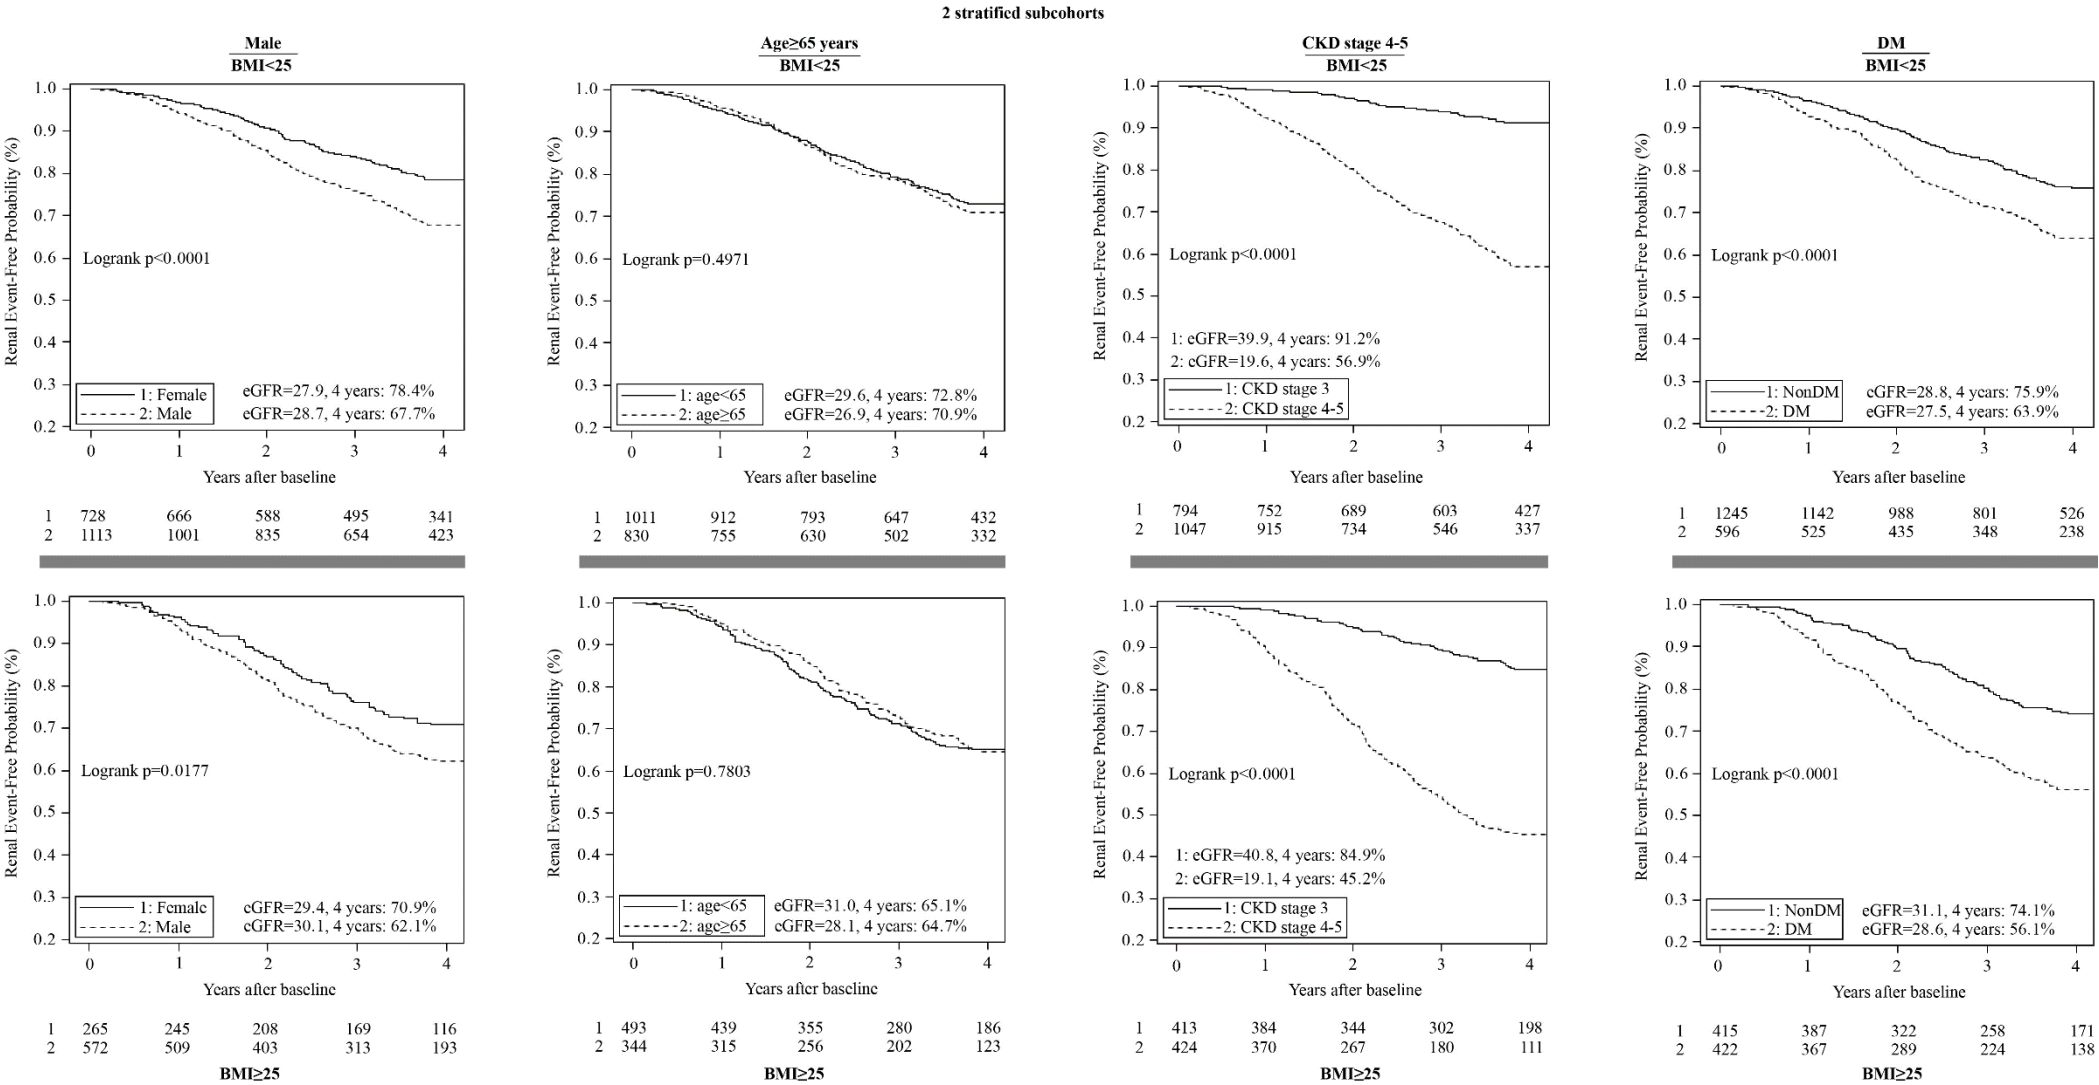

**Appendix Fig. 3A: Kaplan–Meier survival curves for renal prognosis stratified by sex in BMI-based four cross-classified subcohorts**  
 BMI = body mass index. eGFR = estimated glomerular filtration rate. CKD = chronic kidney disease. DM = diabetes mellitus.

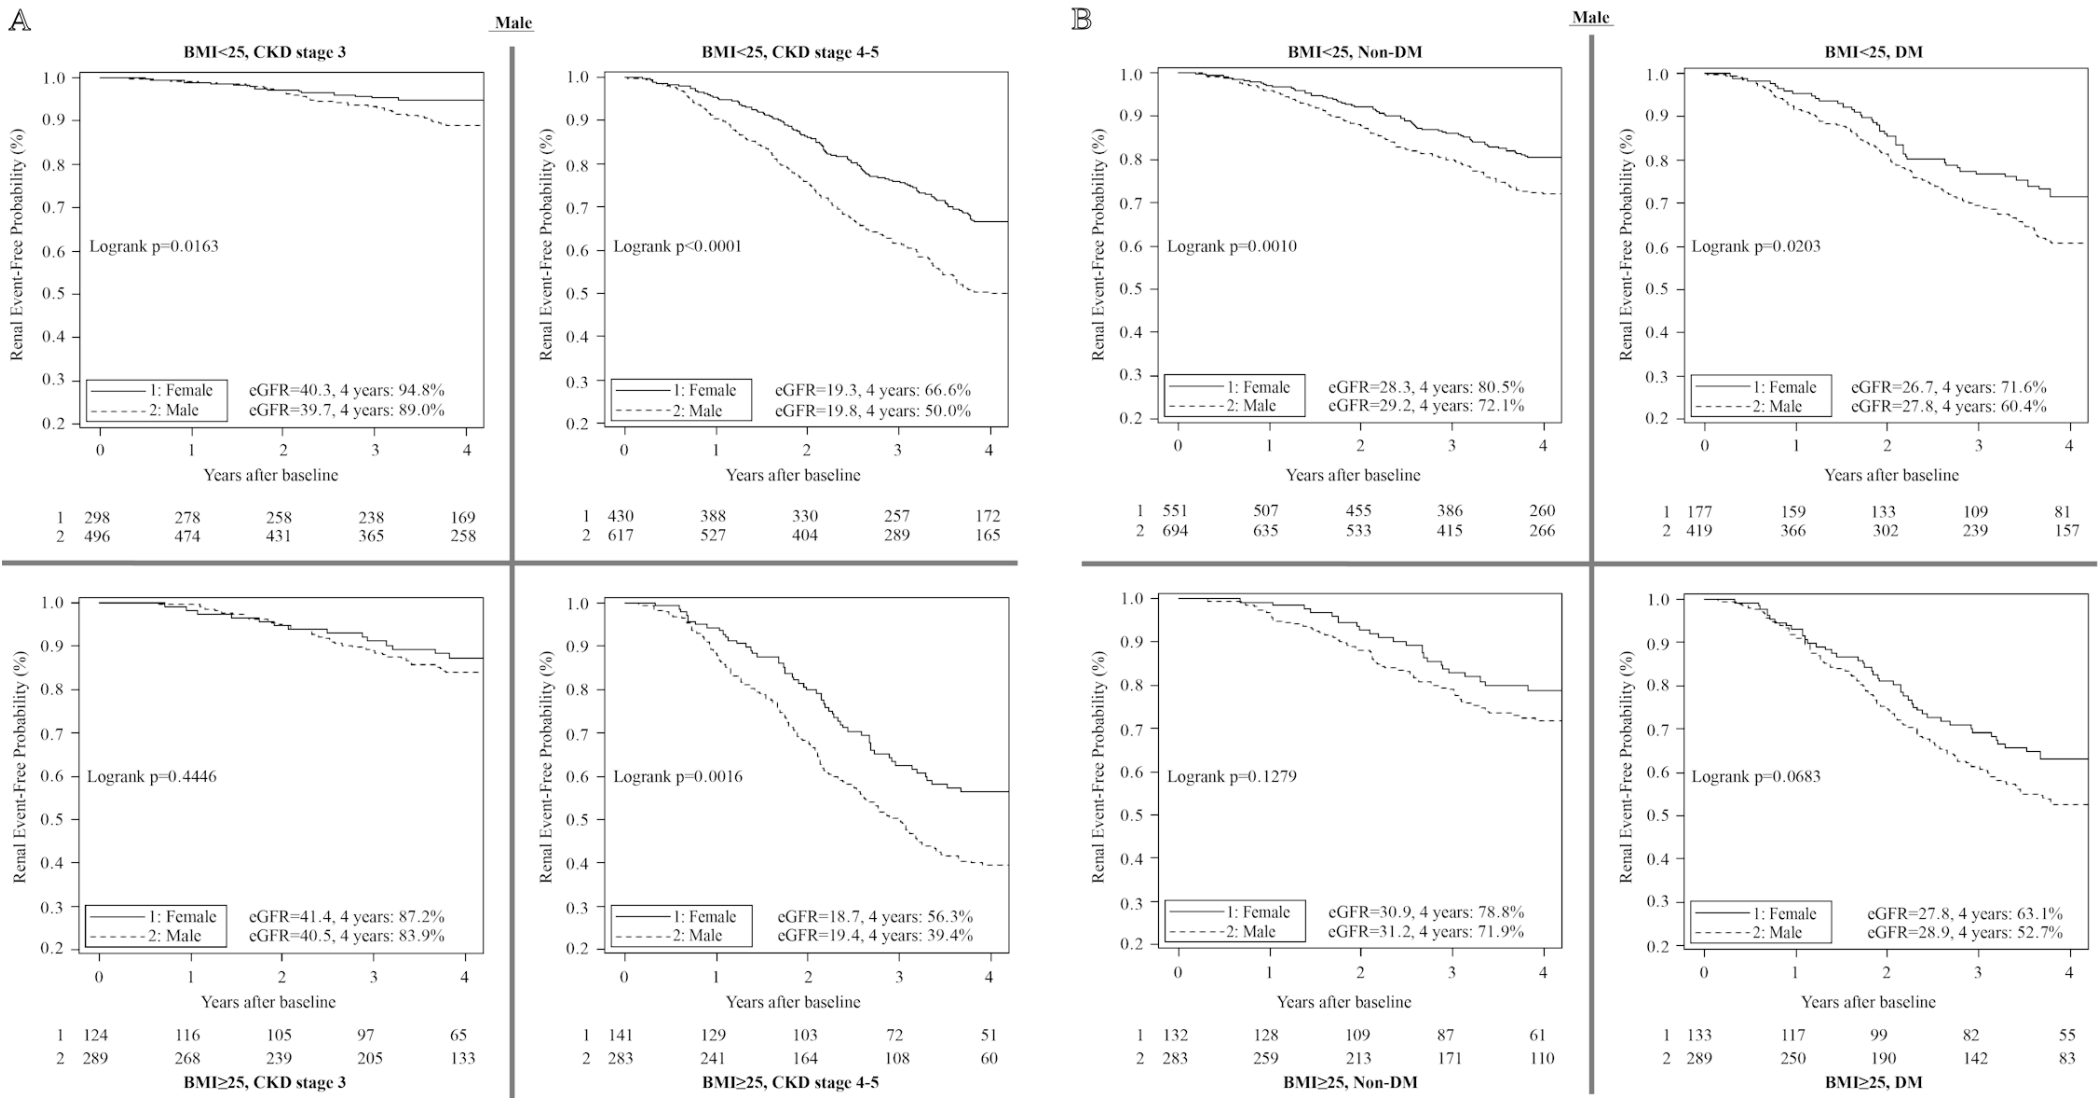



**Appendix Fig. 3B: Kaplan–Meier survival curves for renal prognosis stratified by age in BMI-based four cross-classified subcohorts**  
 BMI = body mass index. eGFR = estimated glomerular filtration rate. CKD = chronic kidney disease.

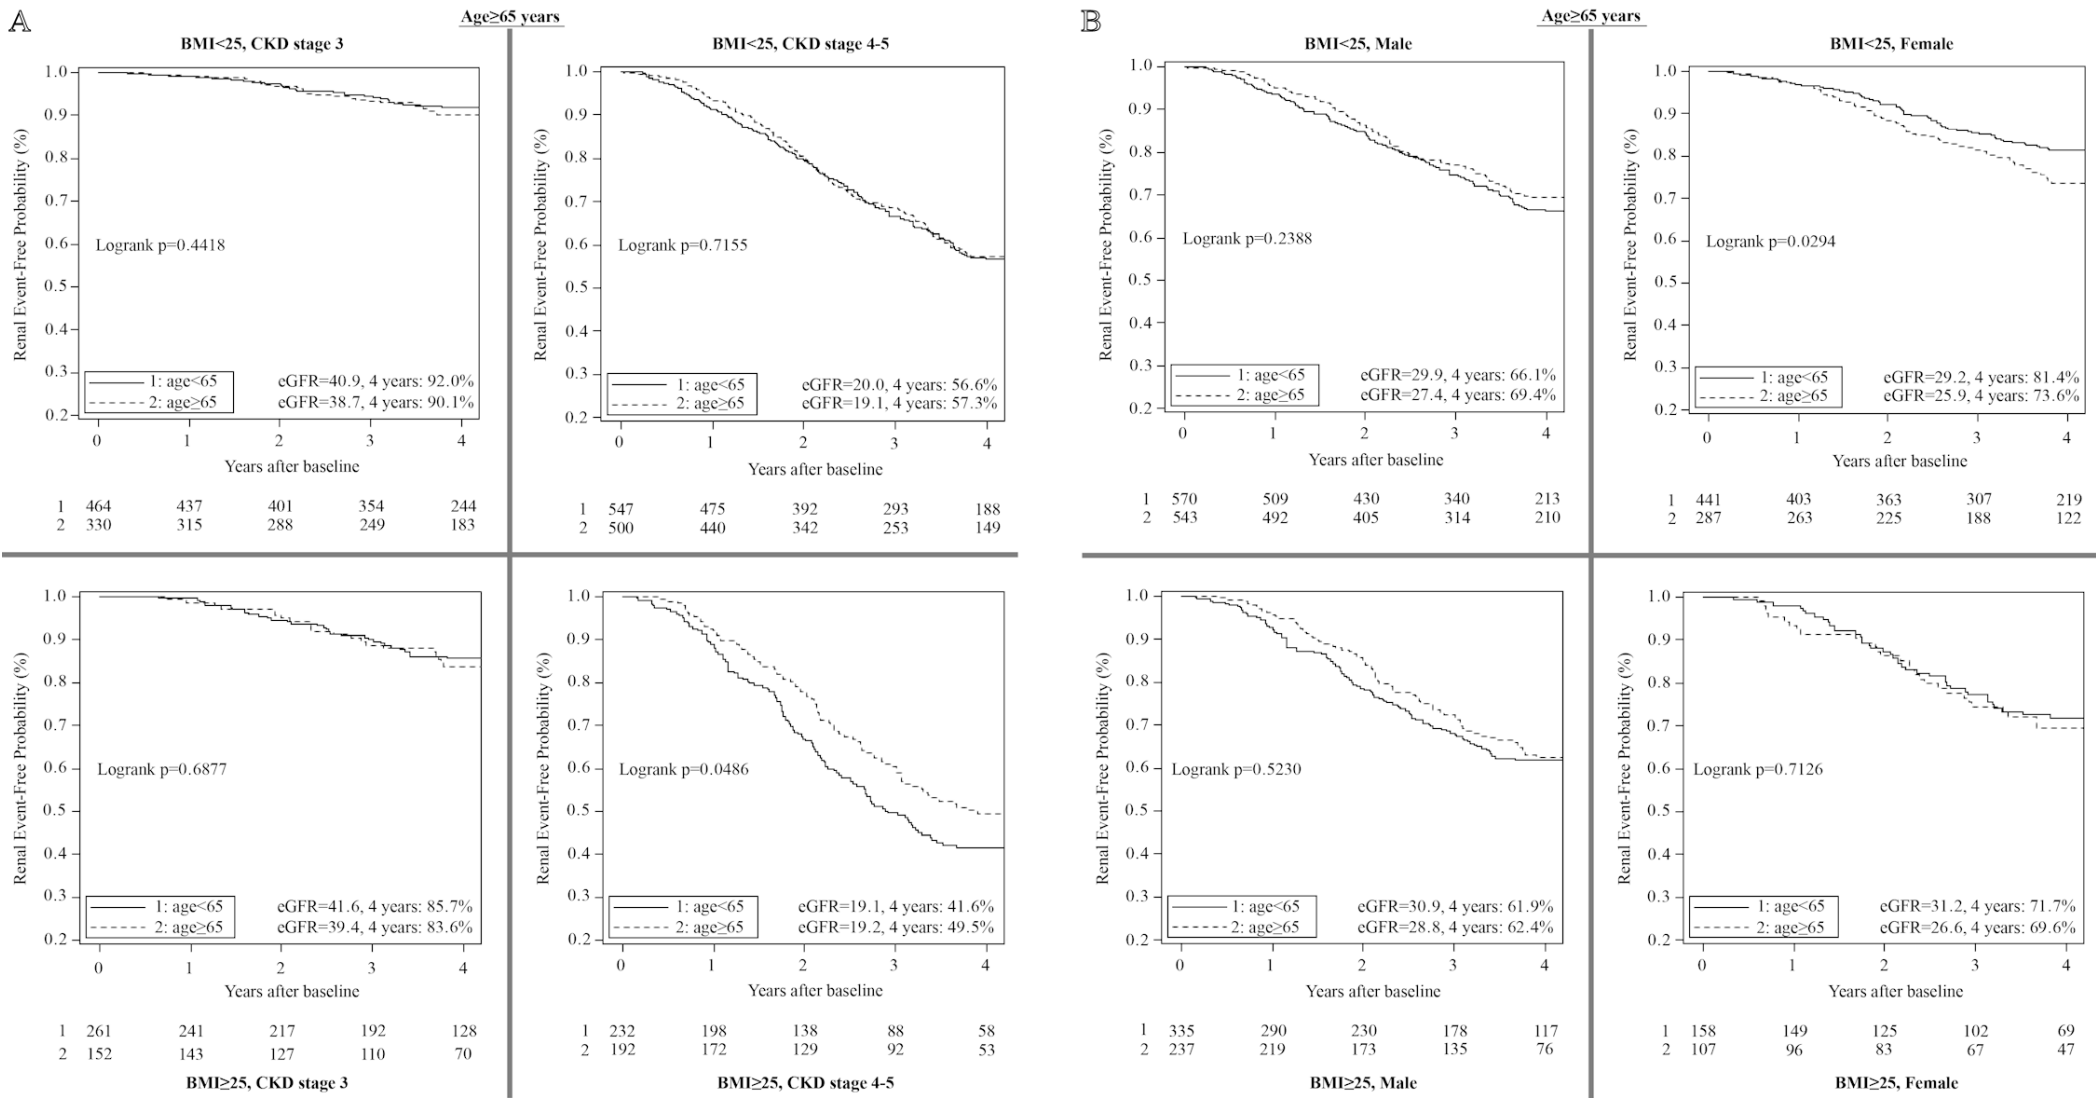

**Appendix Fig. 3C-1: Kaplan–Meier survival curves stratified by CKD stage**  
 Kaplan–Meier survival curves stratified by CKD stage are shown for the total cohort (a) and four BMI-based cross-classified subcohorts (b). BMI = body mass index; eGFR = baseline estimated glomerular filtration rate (ml/min/1.73 m<sup>2</sup>); 4 years = 4-year survival rate; CKD = chronic kidney disease; DM = diabetes mellitus

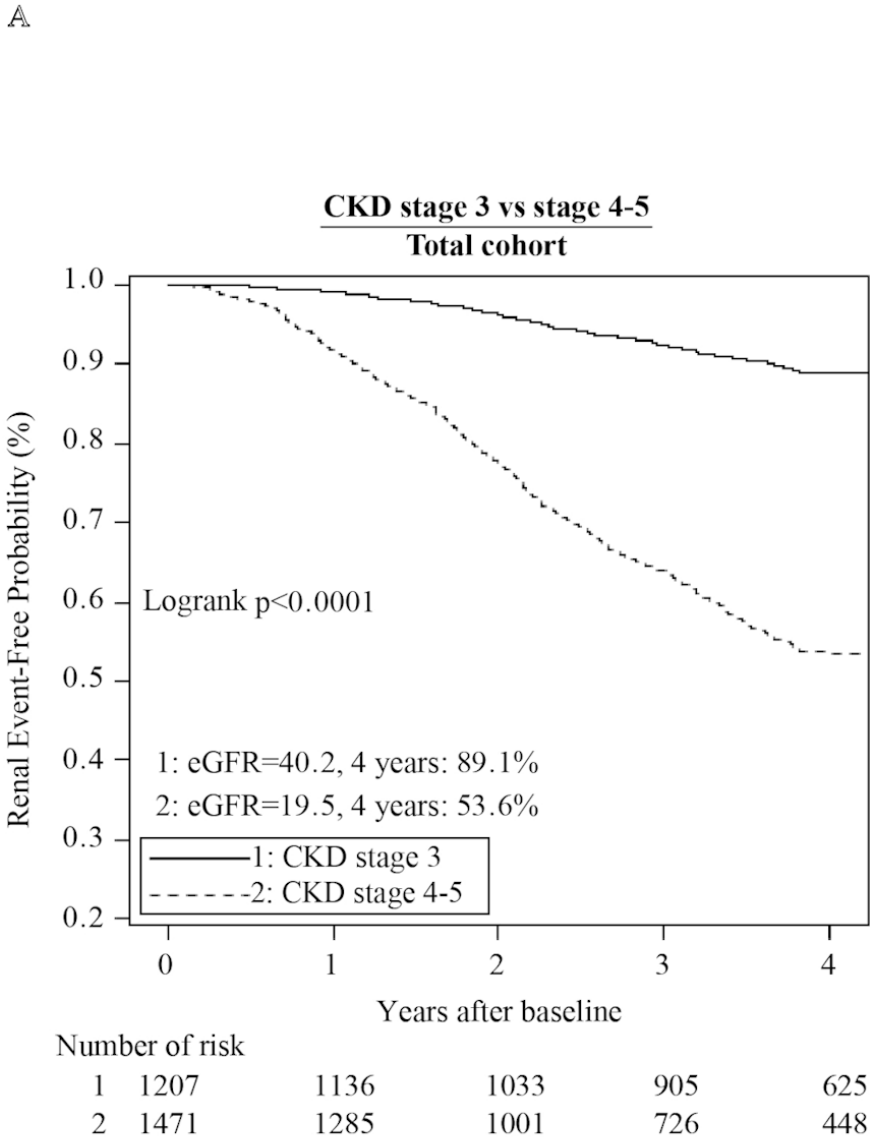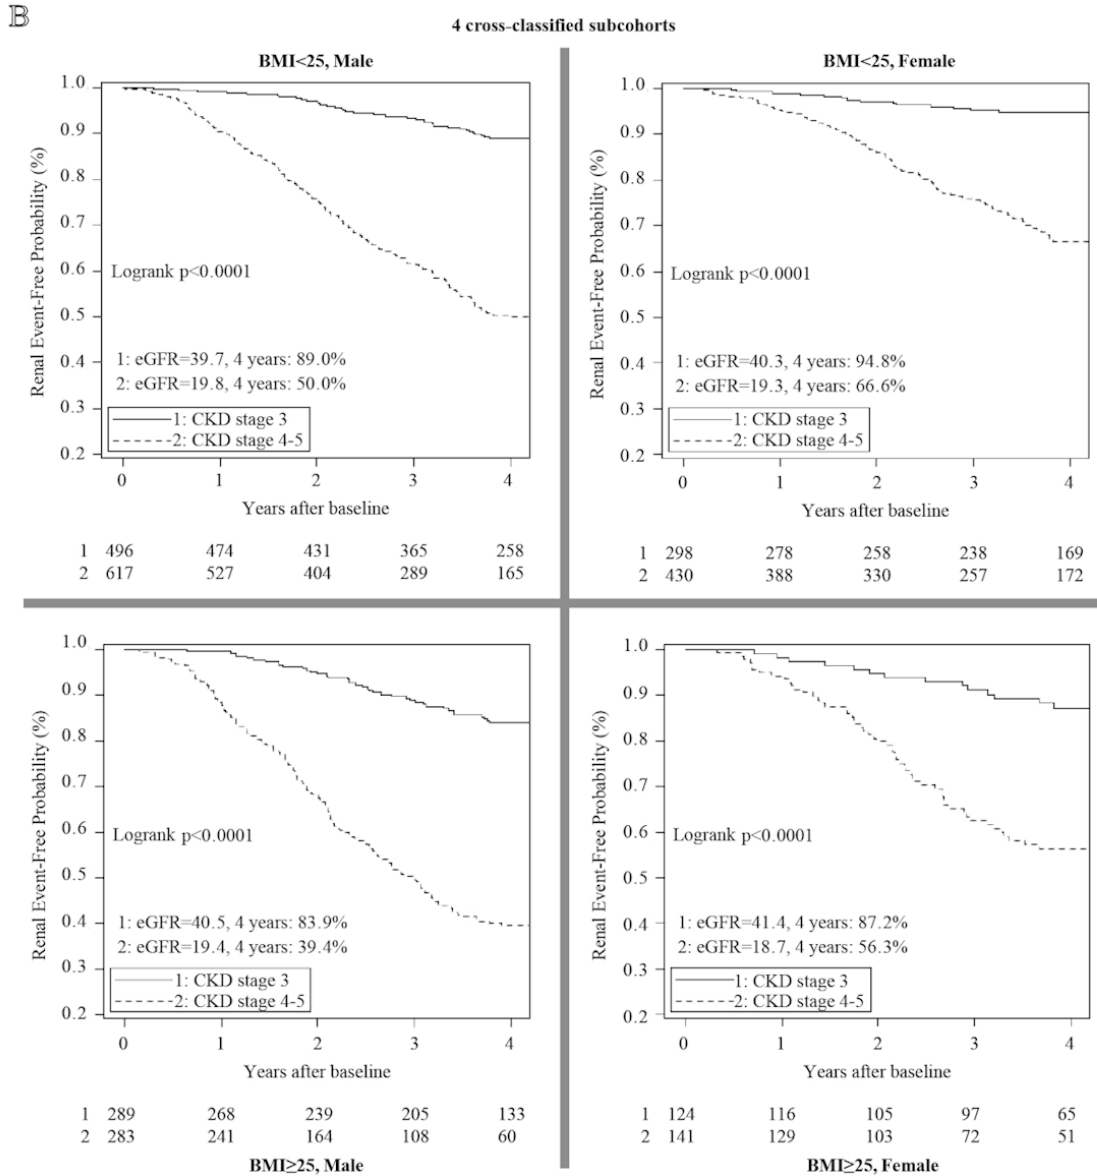

**Appendix Fig. 3C-2: Kaplan–Meier survival curves for renal prognosis stratified by CKD stage in BMI-based four cross-classified subcohorts**  
 BMI = body mass index. eGFR = estimated glomerular filtration rate. CKD = chronic kidney disease. DM = diabetes mellitus.

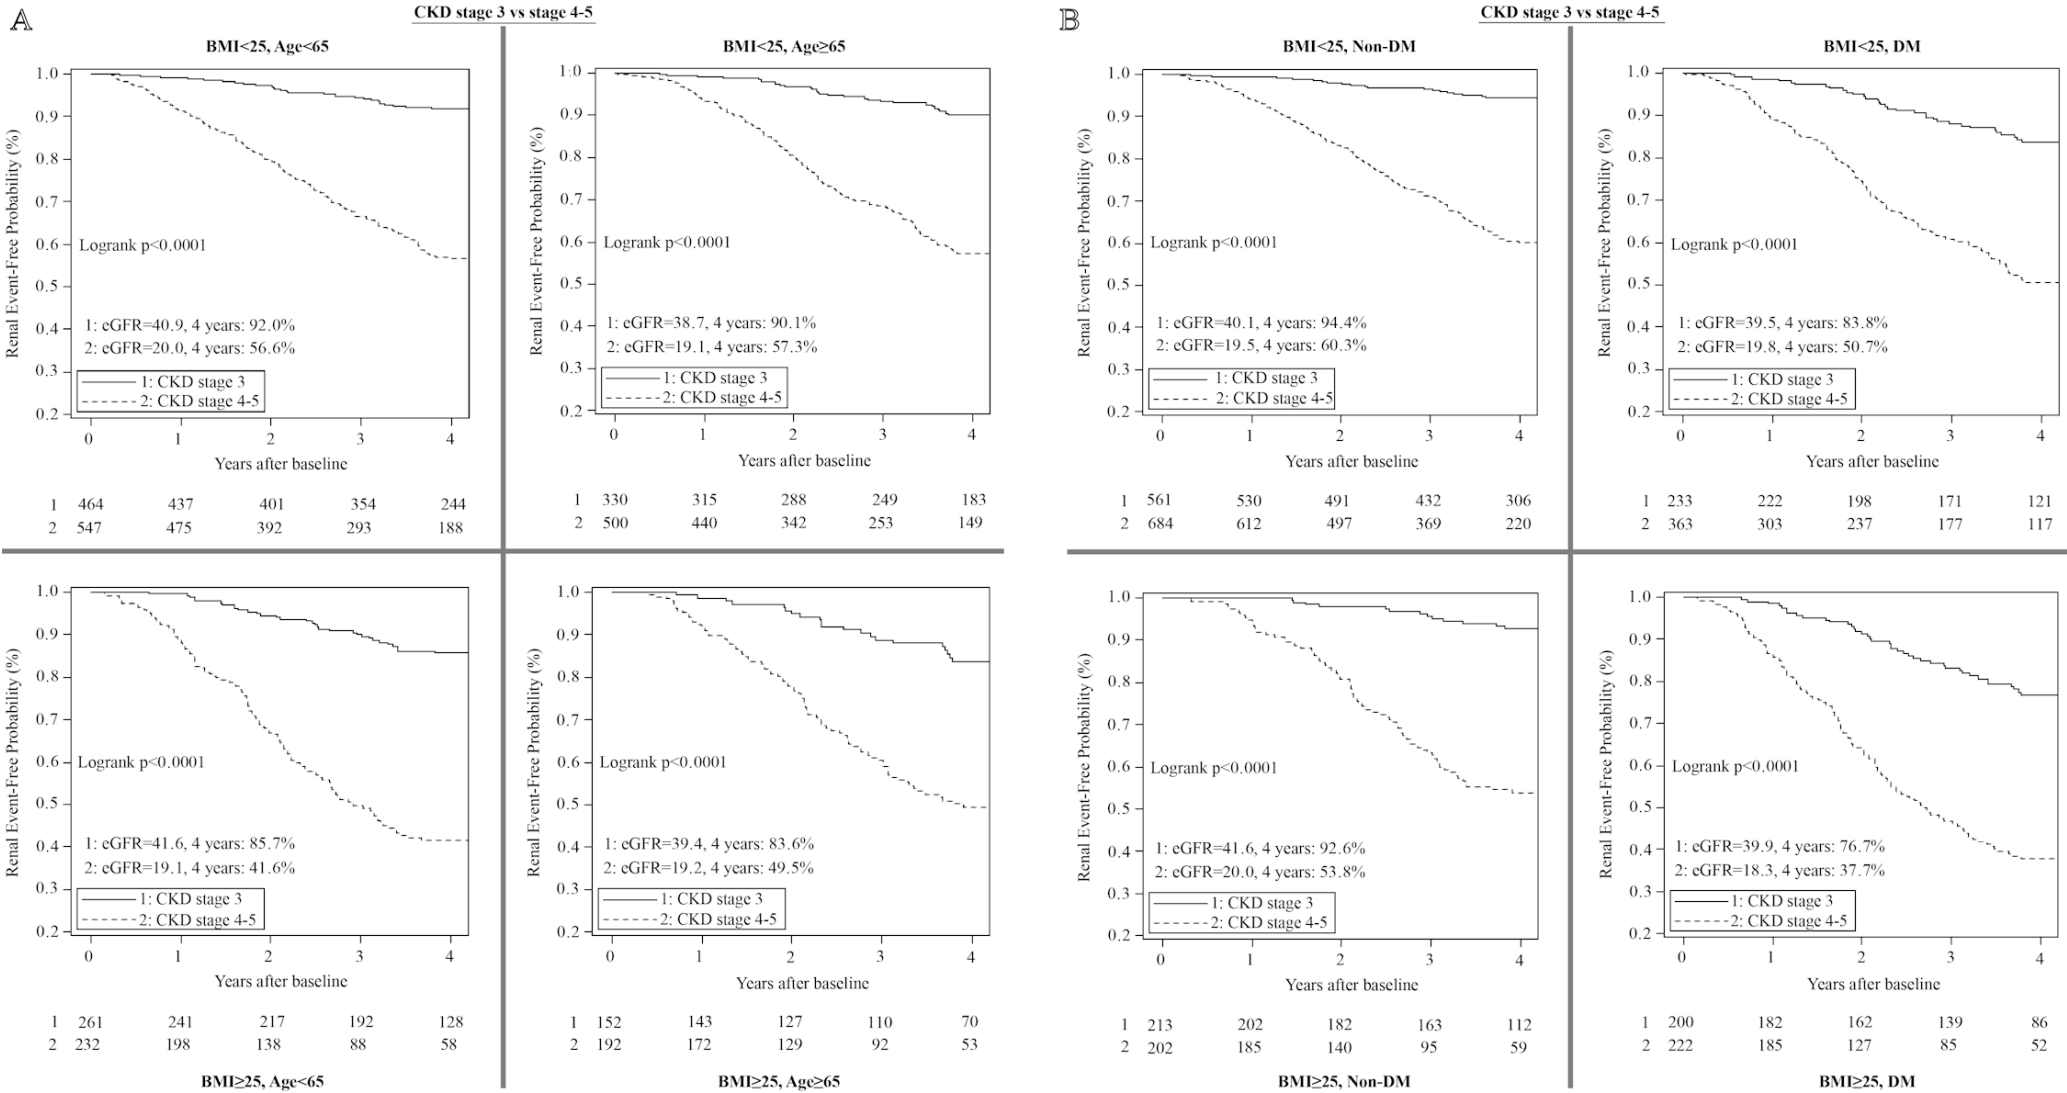

**Appendix Fig. 3D: Kaplan–Meier survival curves for renal prognosis stratified by DM in BMI-based four cross-classified subcohorts**

BMI = body mass index. eGFR = estimated glomerular filtration rate. CKD = chronic kidney disease. DM = diabetes mellitus.

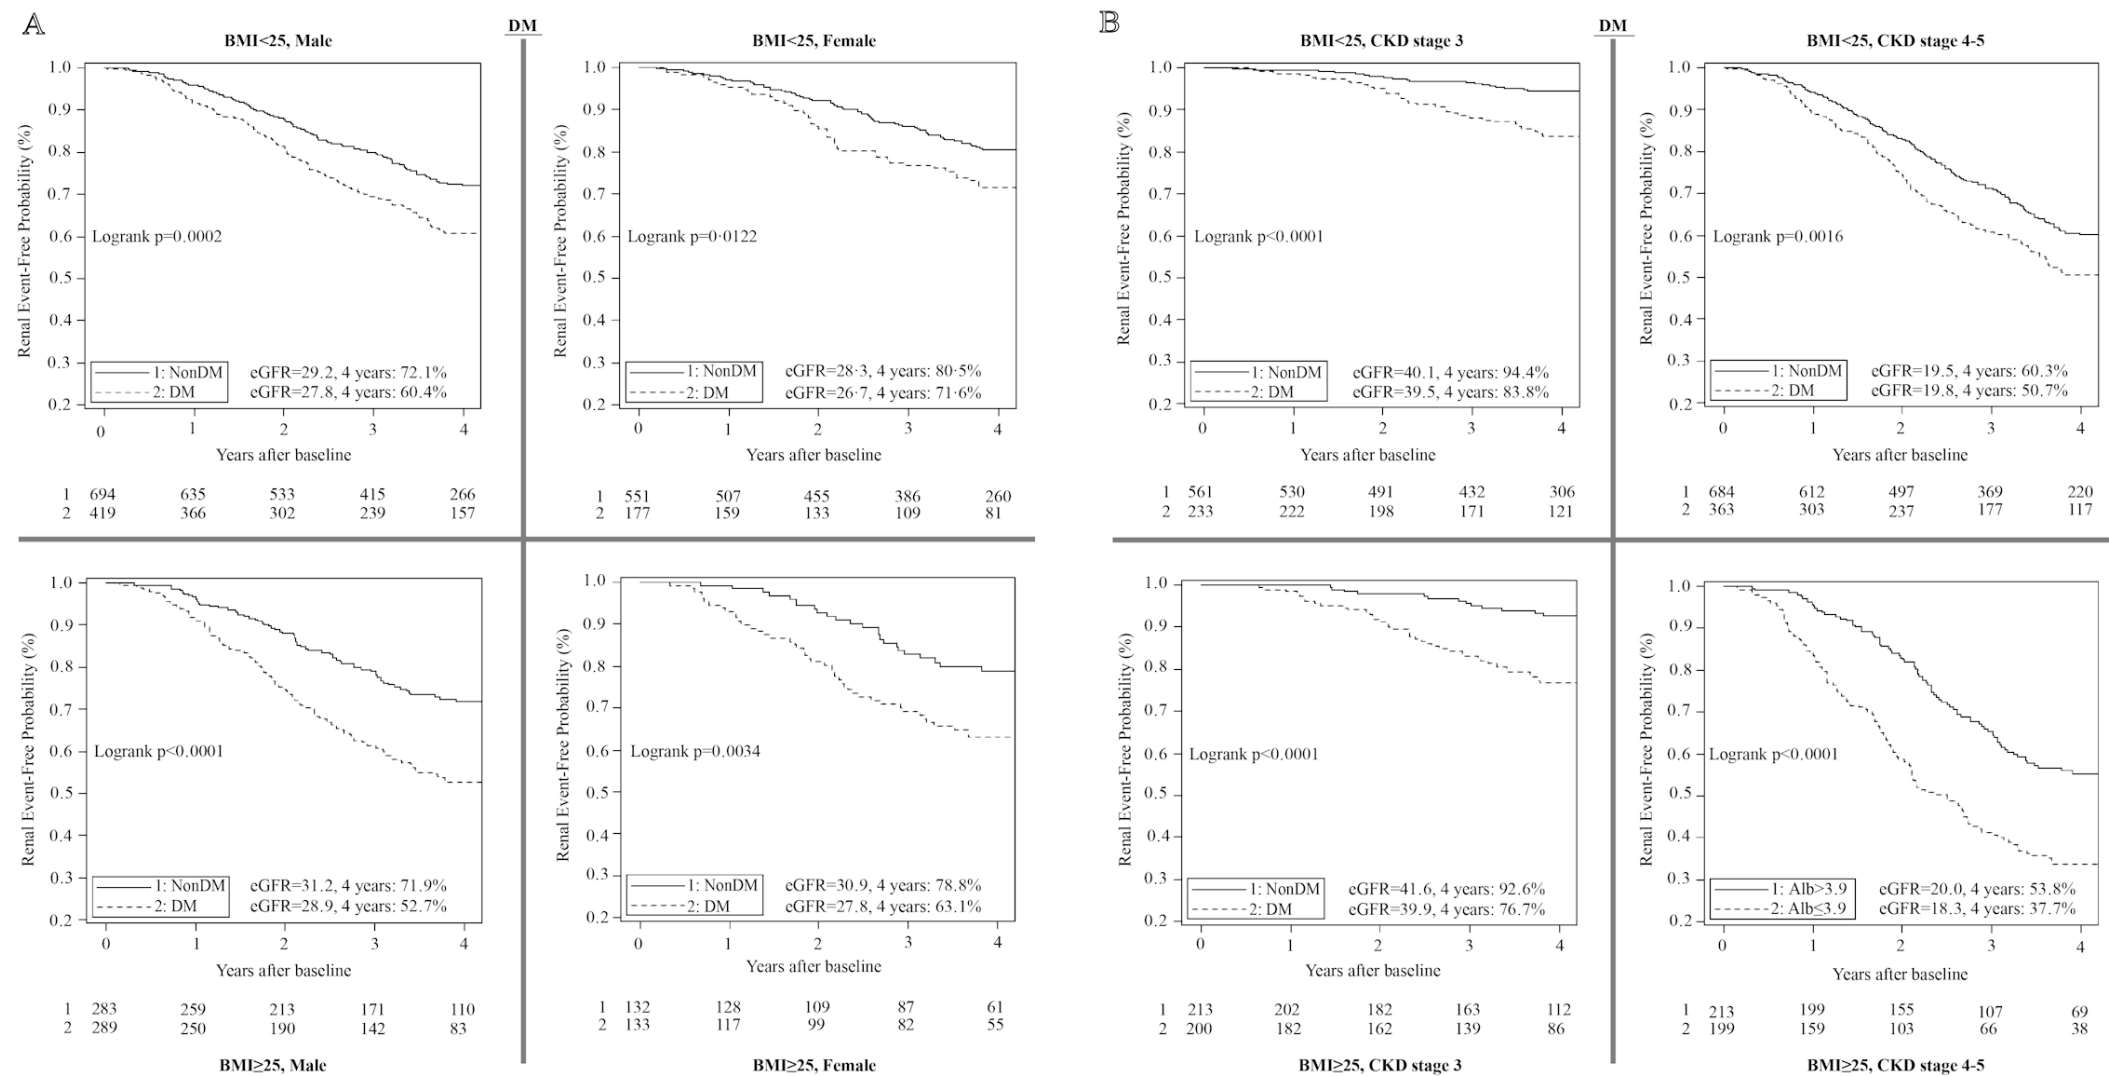

**Appendix Fig. 4: Diagnostic odds ratios of CKD stage 4–5 according to subcohort**

A summary of [Appendix Table 5](#) is depicted. Diagnostic odds ratios (DORs) of CKD stage 4–5 for a decline in estimated glomerular filtration rate by  $\geq 50\%$  from baseline or end-stage renal disease during the follow-up examination period are shown according to subcohort. BMI = body mass index; CKD = chronic kidney disease; DM = diabetes mellitus

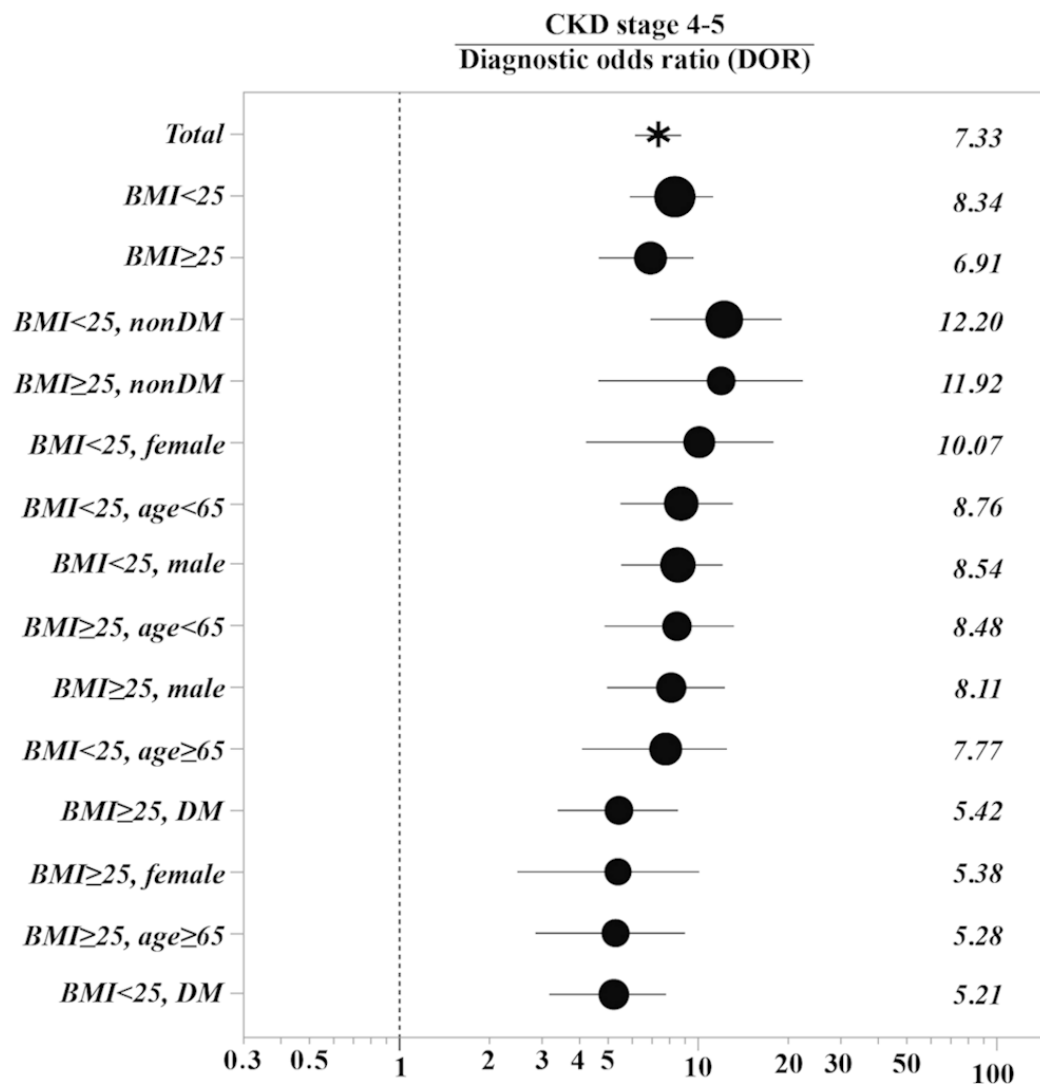

**Appendix Fig. 5: Relationship between the estimated 24-hour urinary potassium excretion (e24hUK) with baseline variables.**

The analyses in relation to age were stratified by sex. BMI = body mass index. UACR = urine albumin-to-creatinine ratio. eGFR = estimated glomerular filtration rate. Serum K = serum potassium. SBP = systolic blood pressure.

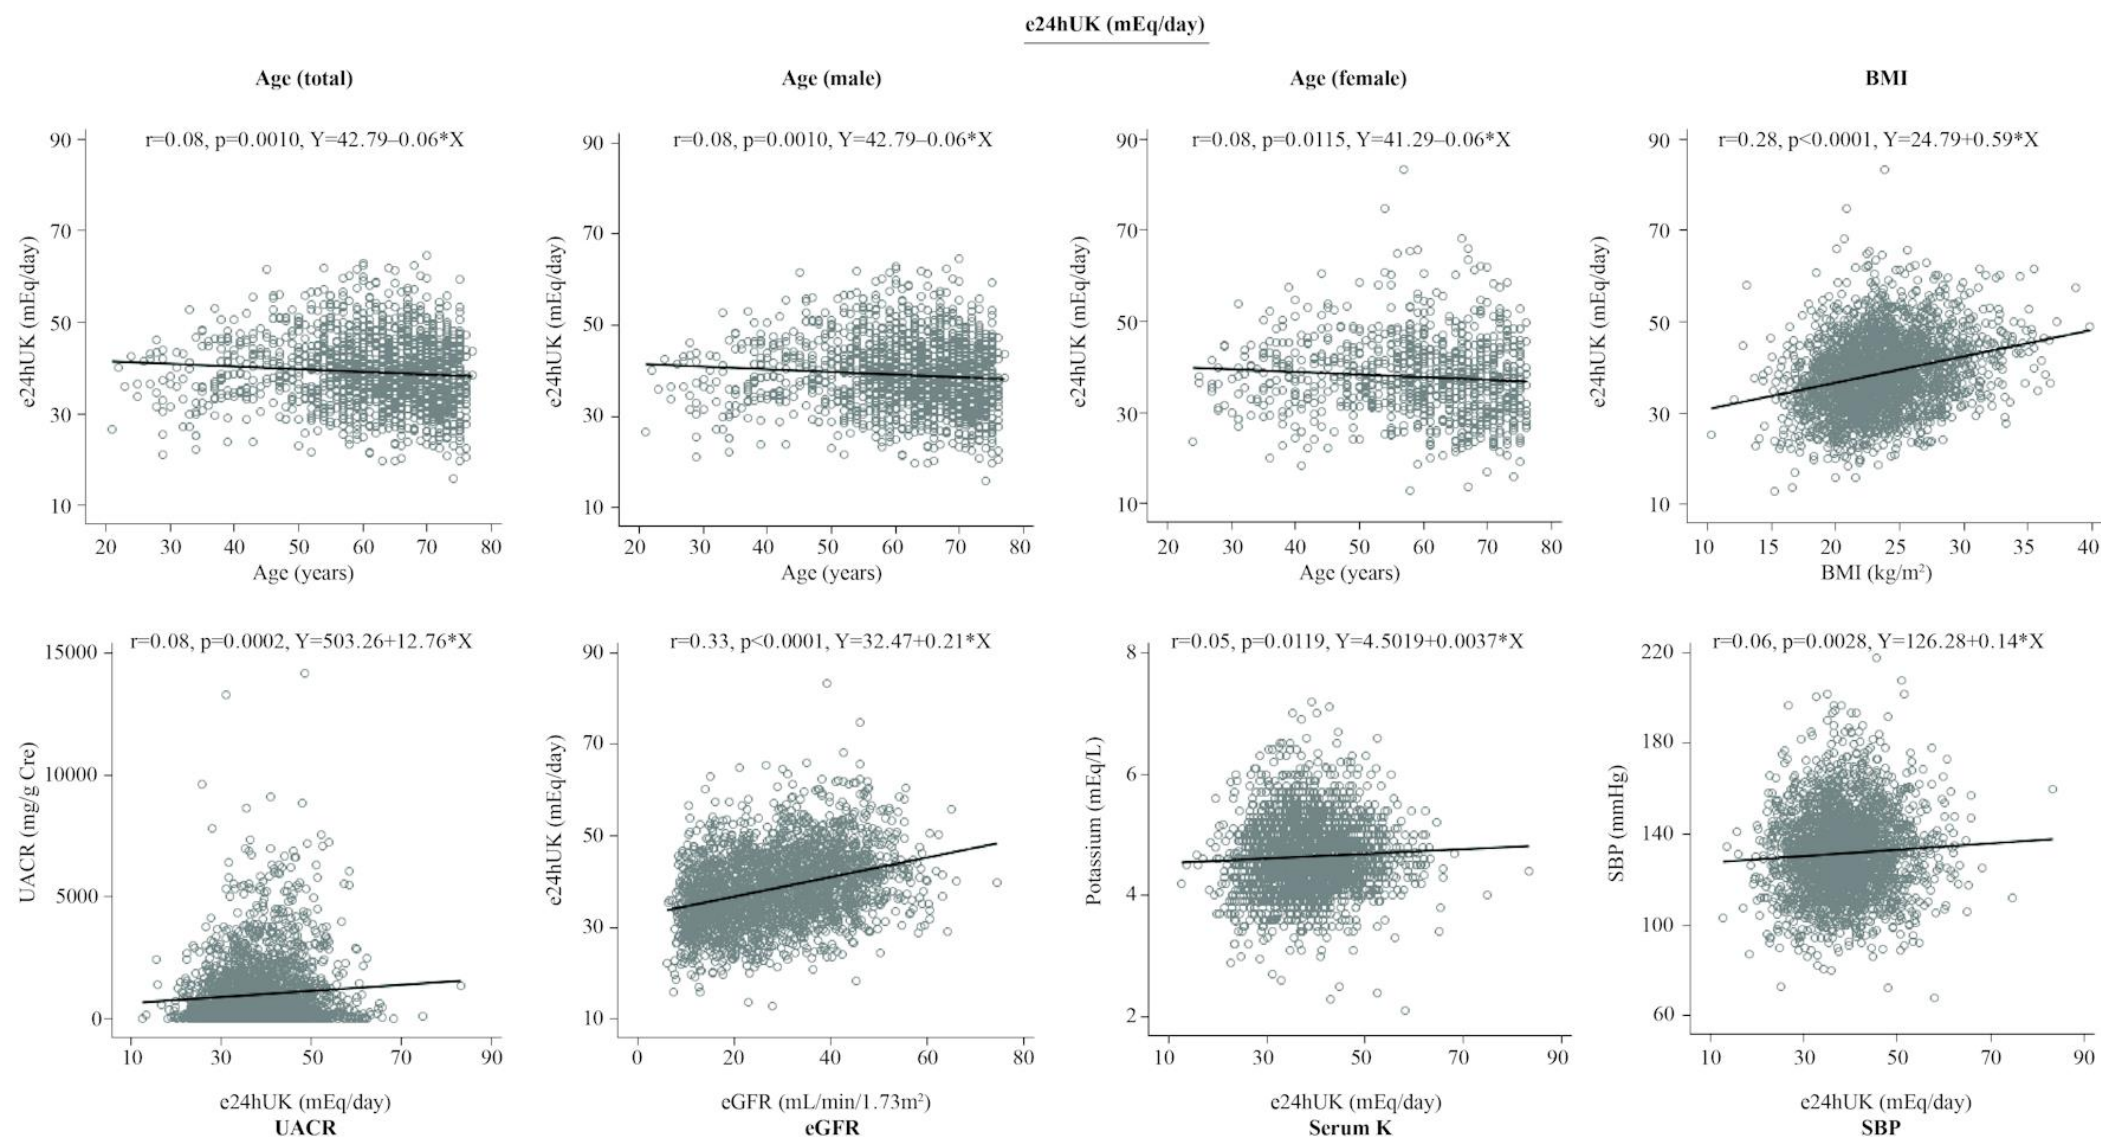



**Appendix Fig. 6B: ROC analyses to identify the optimal cut-off values in the total cohort for predicting renal outcome (Lower side), and Kaplan–Meier survival curves stratified by the cut-off value in the total cohort (Upper side)**

Cut-off values in the total cohort for predicting an eGFR decline by  $\geq 50\%$  from baseline or ESRD that requires renal replacement therapy during the follow-up examination period were examined by ROC analyses. Area under the ROC curves (AUCs) are described in the bottom of the figures respectively. Kaplan–Meier survival curves were stratified by the cut-off value in the total cohort for identified prognostic factors in multivariate Cox analyses in the total cohort. eGFR = estimated glomerular filtration rate. iPTH = intact parathyroid hormone. PP $\times$ HR = pulse pressure  $\times$  heart rate product.

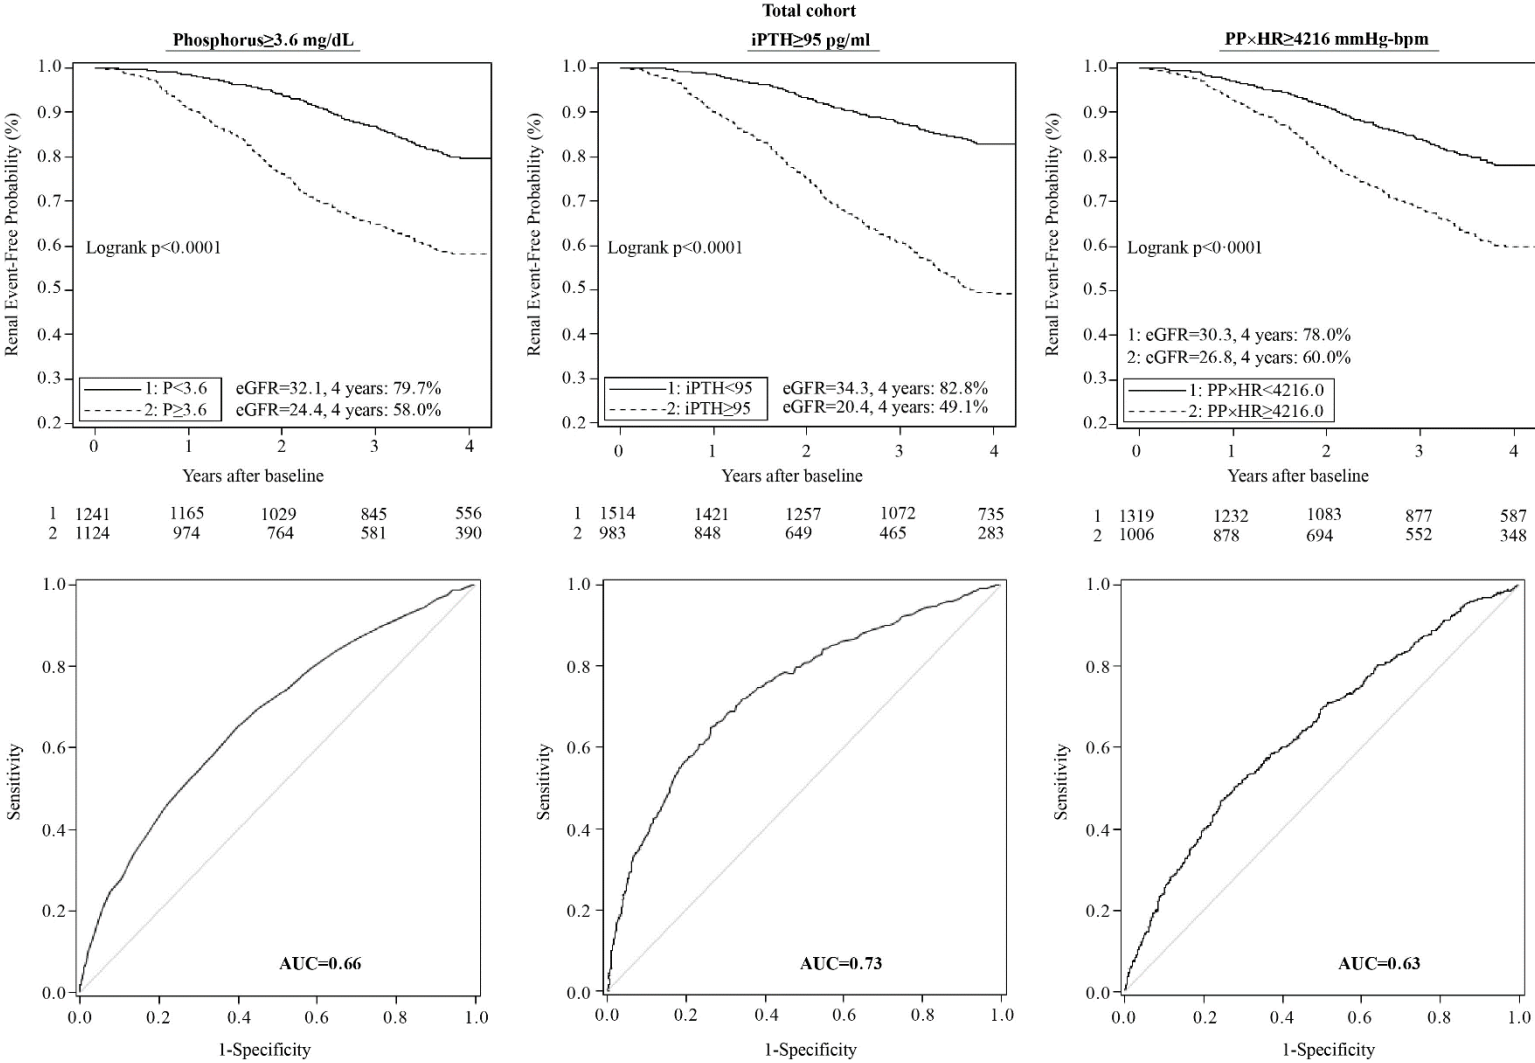



**Appendix Fig. 7A: Kaplan–Meier survival curves for renal prognosis stratified by the cut-off values of renal prognostic factors in the total cohort, in BMI-based two stratified subcohorts**  
**(Upper side: BMI < 25 kg/m<sup>2</sup>, Lower side: BMI ≥ 25 kg/m<sup>2</sup>)**

BMI = body mass index. eGFR = estimated glomerular filtration rate. UACR = urine albumin-to-creatinine ratio. e24hUK = estimated 24-hour urinary potassium excretion.

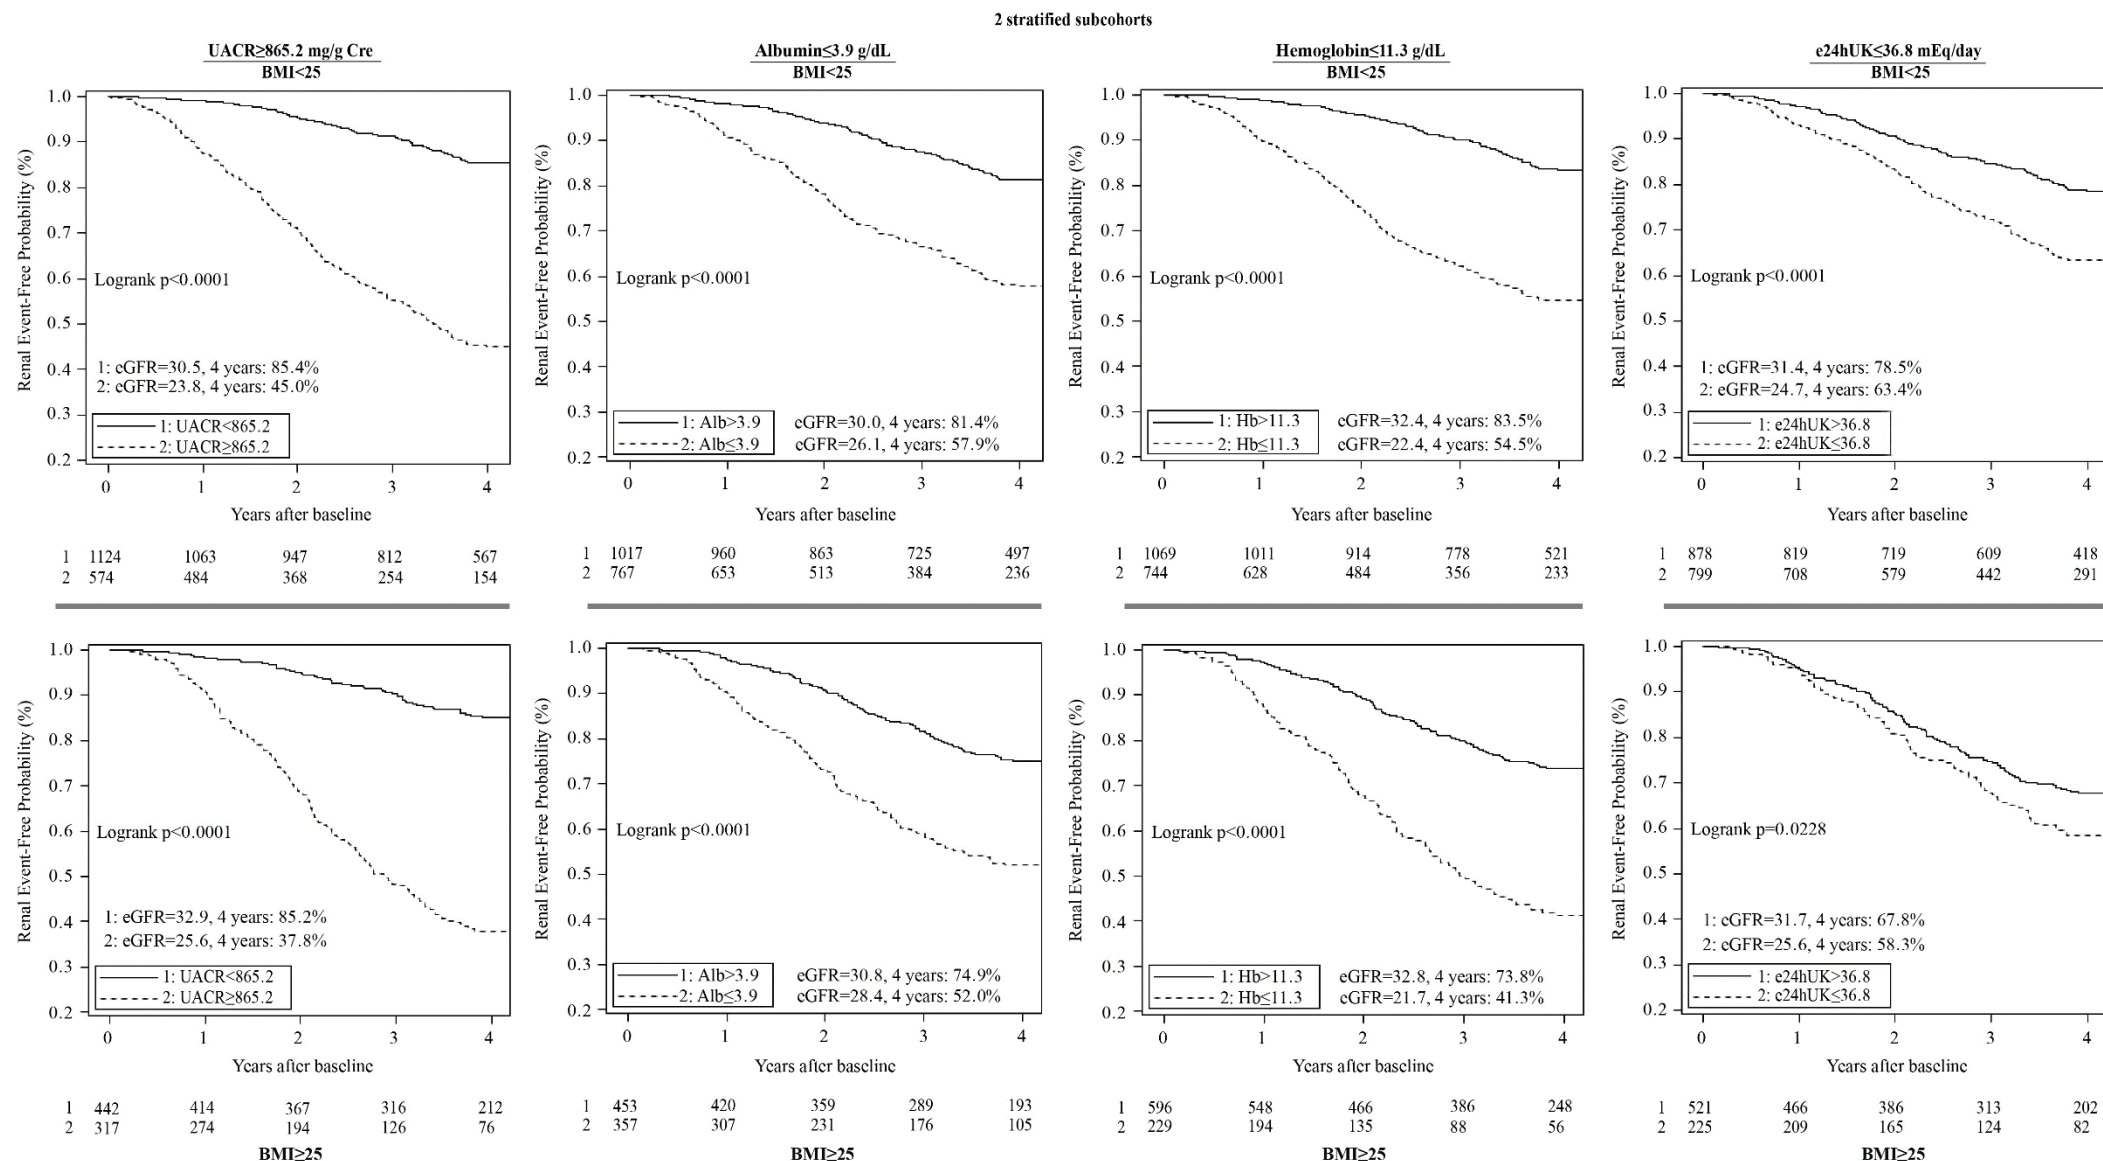

**Appendix Fig. 7B: Kaplan–Meier survival curves for renal prognosis stratified by the cut-off values of renal prognostic factors in the total cohort, in BMI-based two stratified subcohorts**  
**(Upper side: BMI < 25 kg/m<sup>2</sup>, Lower side: BMI ≥ 25 kg/m<sup>2</sup>)**  
 BMI = body mass index. eGFR = estimated glomerular filtration rate. iPTH = intact parathyroid hormone. PP × HR = pulse pressure × heart rate product.

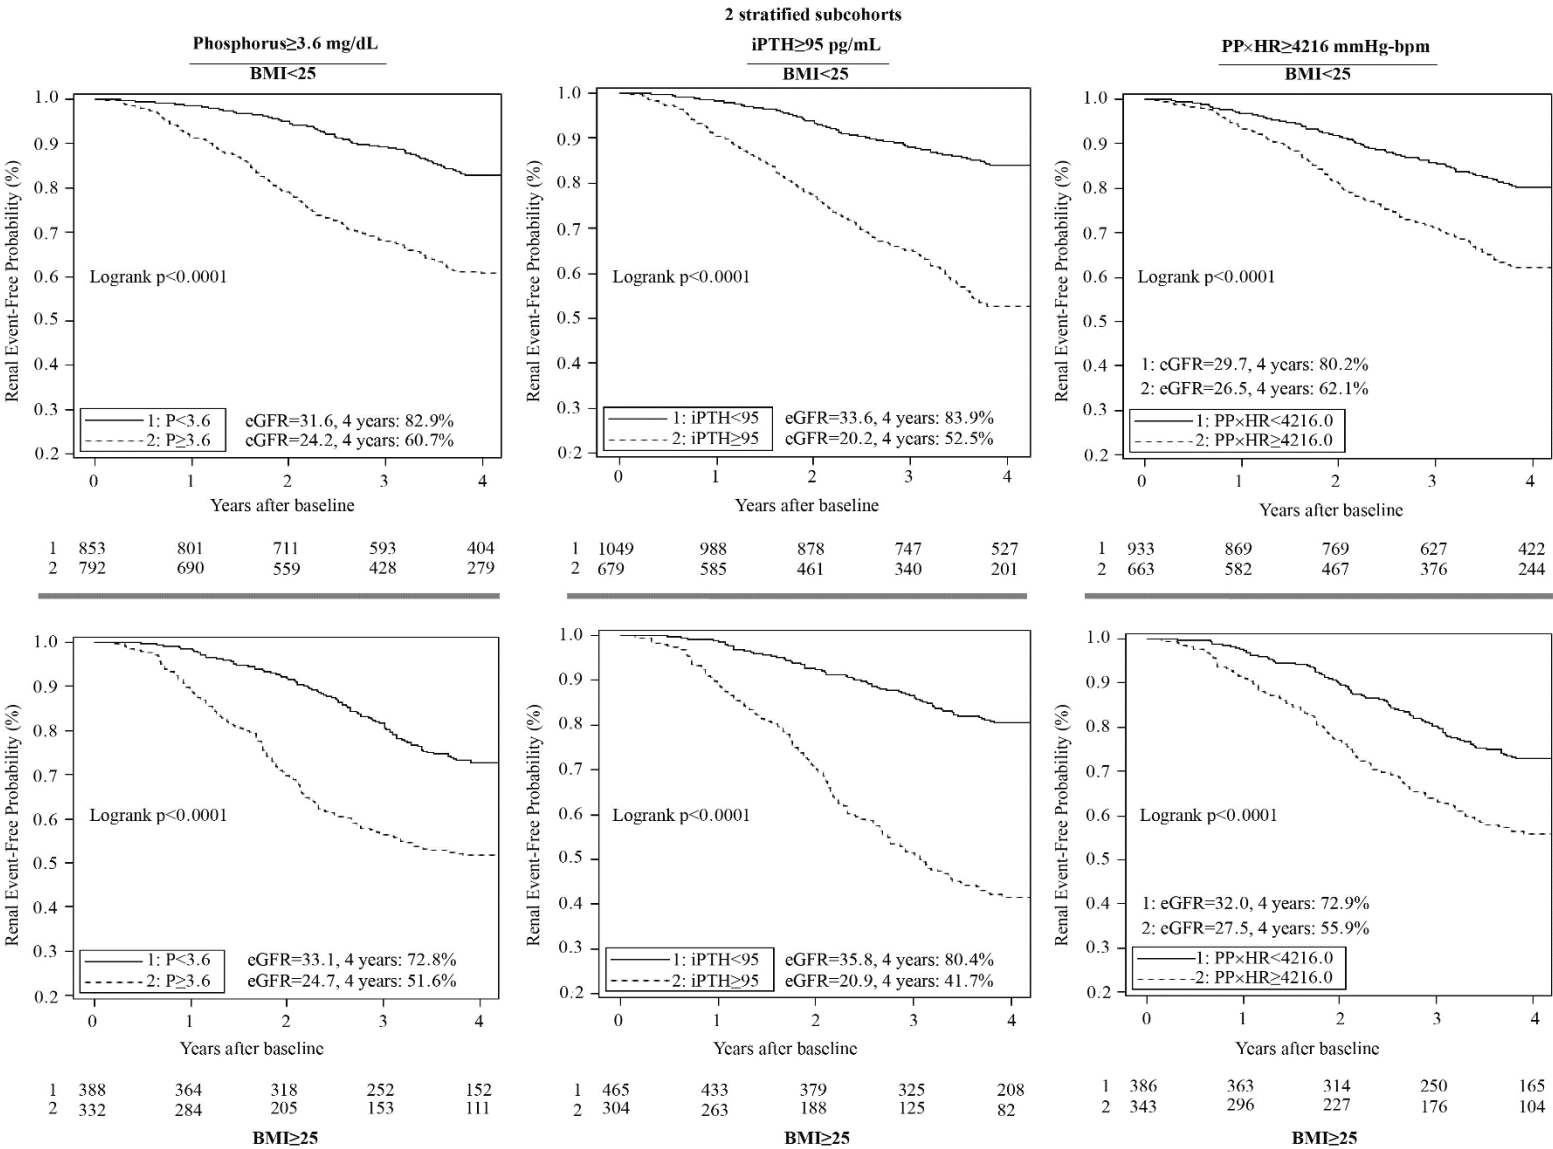

**Appendix Figure 8A: Kaplan–Meier survival curves stratified by the PP × HR cut-off value**

Kaplan–Meier survival curves for renal prognosis stratified by the PP × HR cut-off value (determined using the total cohort) are shown for the total cohort (A) and four BMI-based cross-classified subcohorts (B). PP × HR = pulse pressure × heart rate product; BMI = body mass index; eGFR = baseline estimated glomerular filtration rate (ml/min/1.73 m<sup>2</sup>); 4 years = 4-year survival rate; CKD = chronic kidney disease

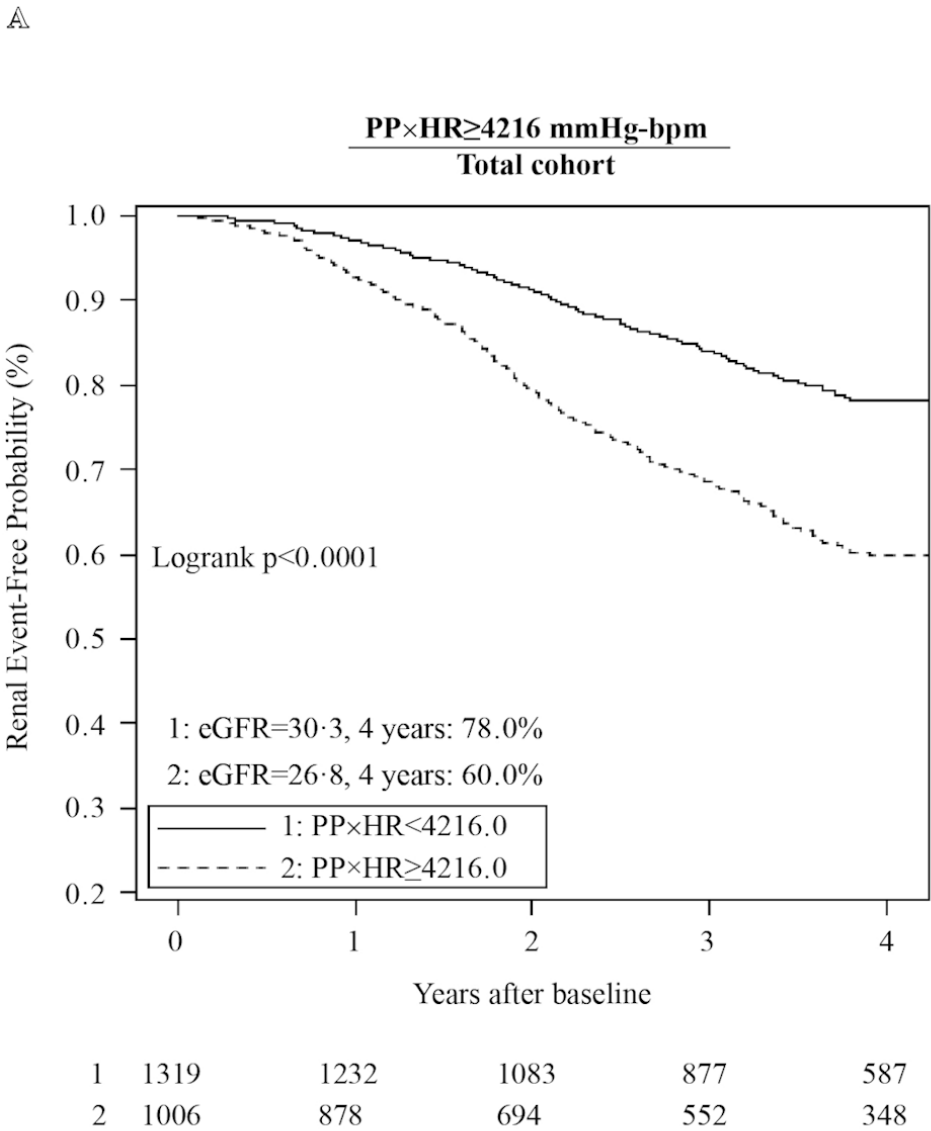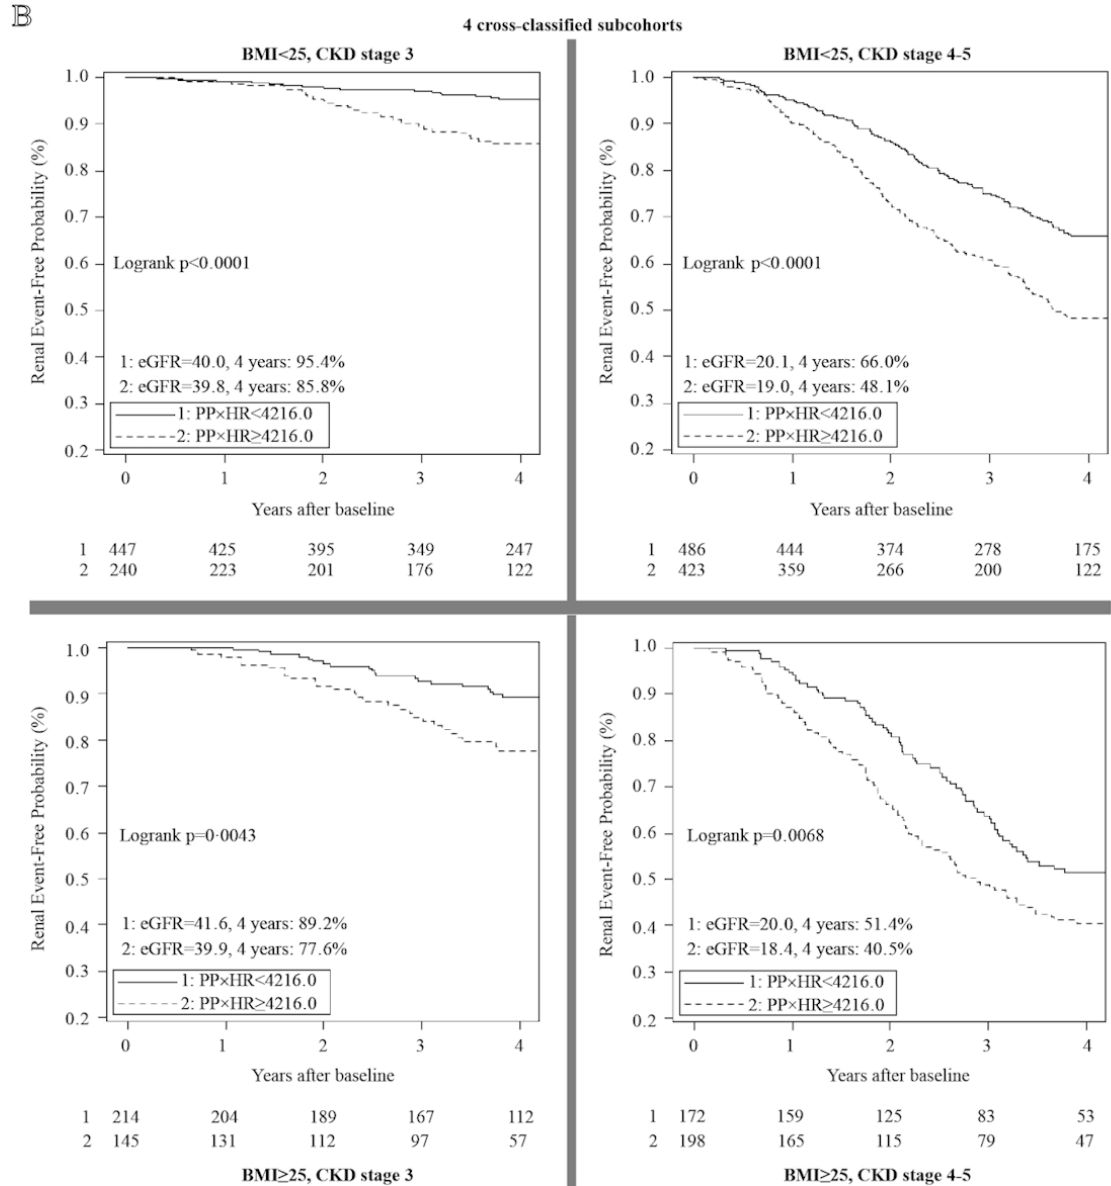

**Appendix Figure 8B: Kaplan–Meier survival curves stratified by the e24hUK cut-off value**

Kaplan–Meier survival curves for renal prognosis stratified by the e24hUK cut-off value (determined using the total cohort) are shown for the total cohort (A) and four BMI-based cross-classified subcohorts (B). e24hUK = estimated 24-hour urinary potassium excretion; BMI = body mass index; eGFR = baseline estimated glomerular filtration rate (ml/min/1.73 m<sup>2</sup>); 4 years = 4-year survival rate; CKD = chronic kidney disease

A

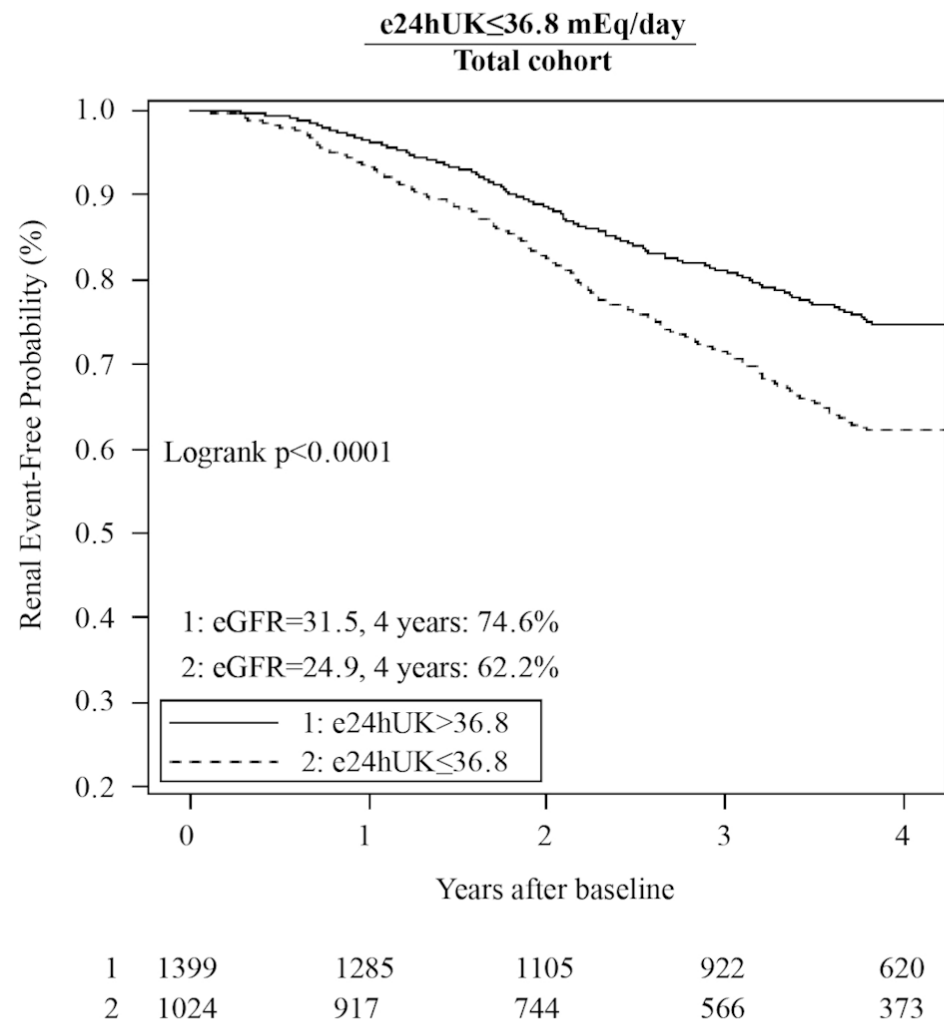

B

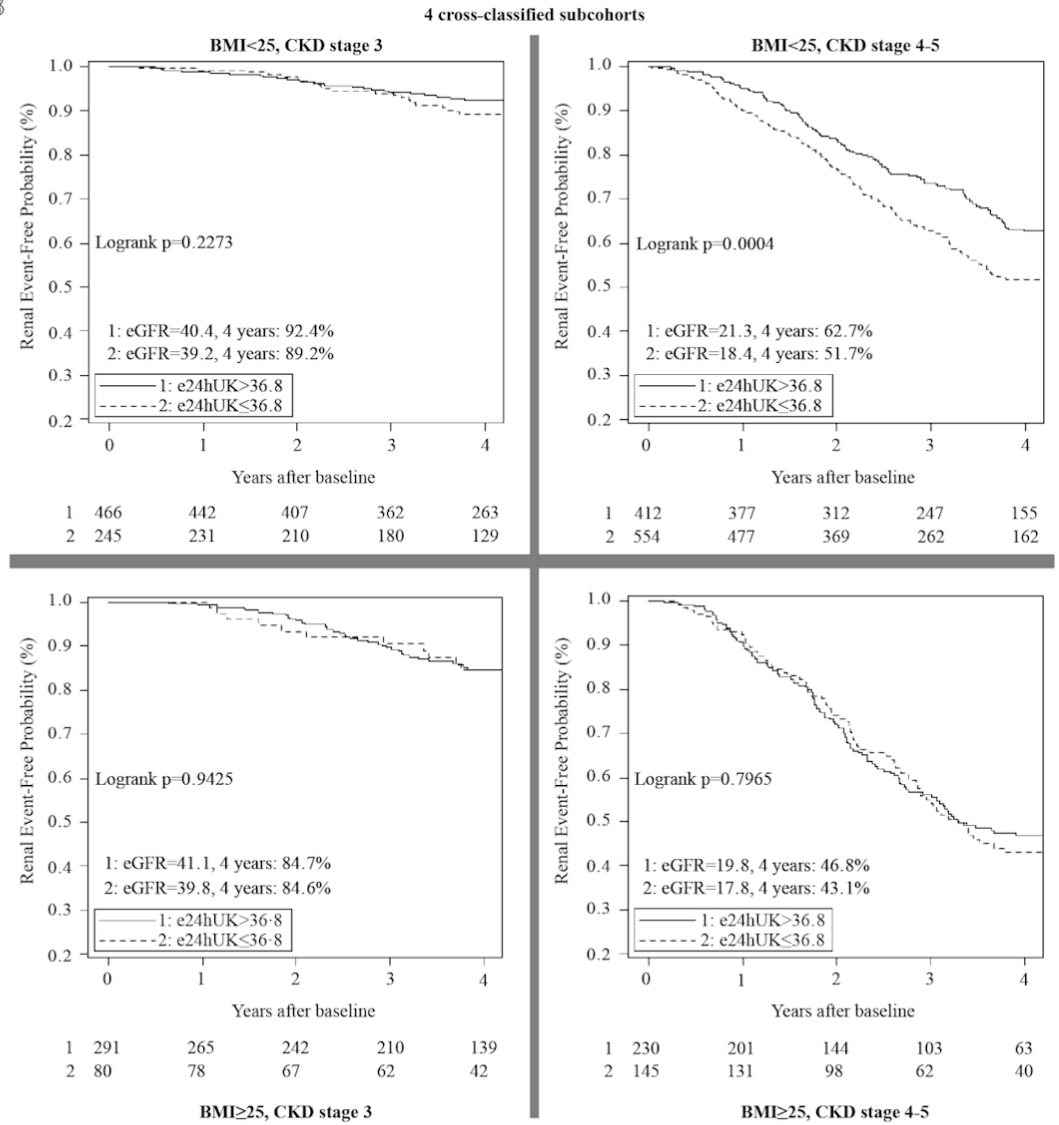

**Appendix Fig. 8C: Kaplan–Meier survival curves stratified by the serum albumin cut-off value**

Kaplan–Meier survival curves for renal prognosis stratified by the serum albumin cut-off value (determined using the total cohort) are shown for the total cohort (Left side) and four BMI-based cross-classified subcohorts (Right side). BMI = body mass index; eGFR = baseline estimated glomerular filtration rate (ml/min/1.73 m<sup>2</sup>); 4 years = 4-year survival rate; DM = diabetes mellitus

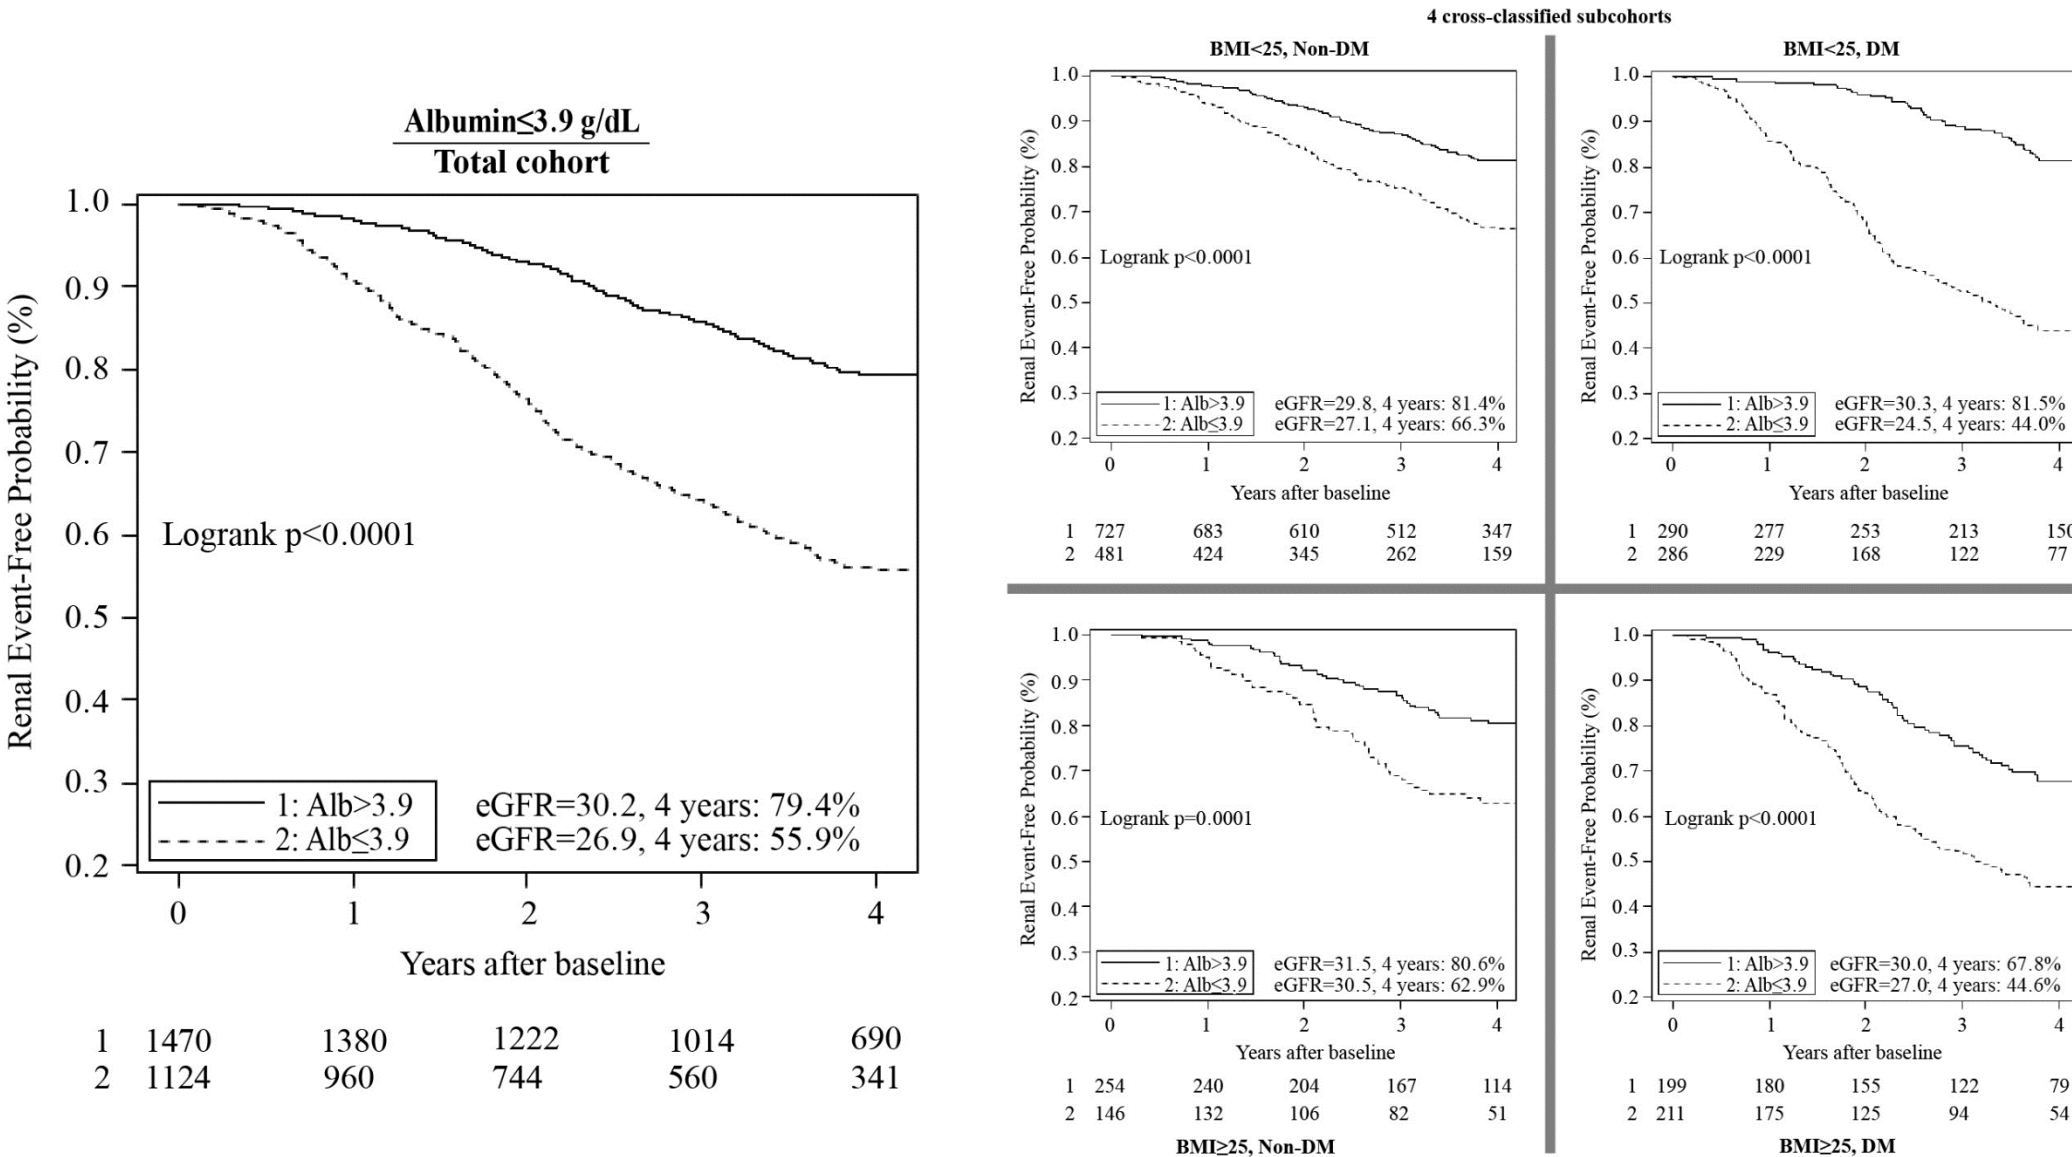

**Appendix Fig. 8D: Kaplan–Meier survival curves stratified by the hemoglobin cut-off value**

Kaplan–Meier survival curves for renal prognosis stratified by the hemoglobin cut-off value (determined using the total cohort) are shown for the total cohort (Left side) and four BMI-based cross-classified subcohorts (Right side). BMI = body mass index; eGFR = baseline estimated glomerular filtration rate (ml/min/1.73 m<sup>2</sup>); 4 years = 4-year survival rate

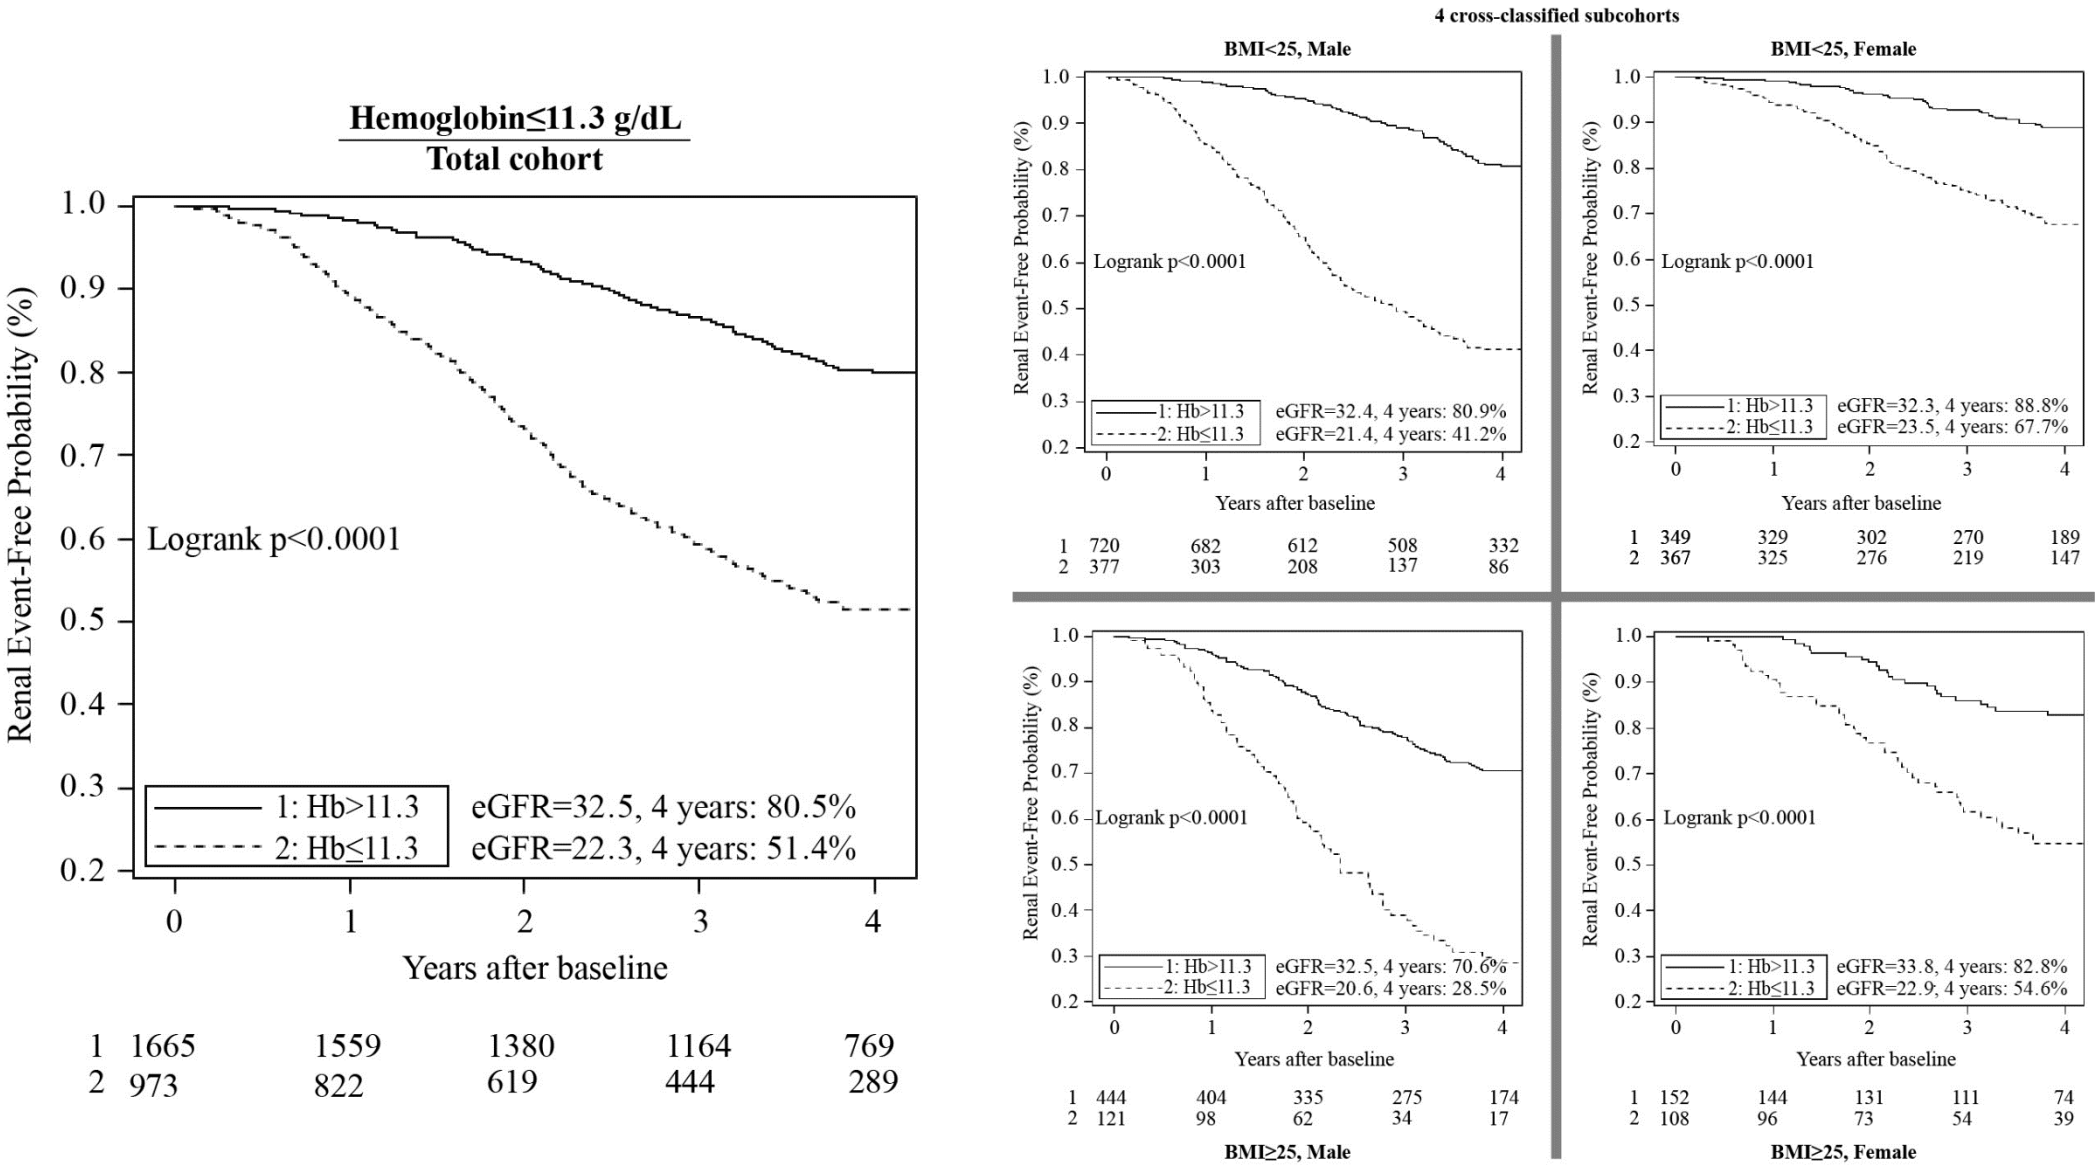

**Appendix Fig. 8E: Kaplan–Meier survival curves stratified by the serum phosphorous cut-off value**

Kaplan–Meier survival curves for renal prognosis stratified by the serum phosphorous cut-off value (determined using the total cohort) are shown for the total cohort (Left side) and four BMI-based cross-classified subcohorts (Right side). BMI = body mass index; eGFR = baseline estimated glomerular filtration rate (ml/min/1.73 m<sup>2</sup>); 4 years = 4-year survival rate

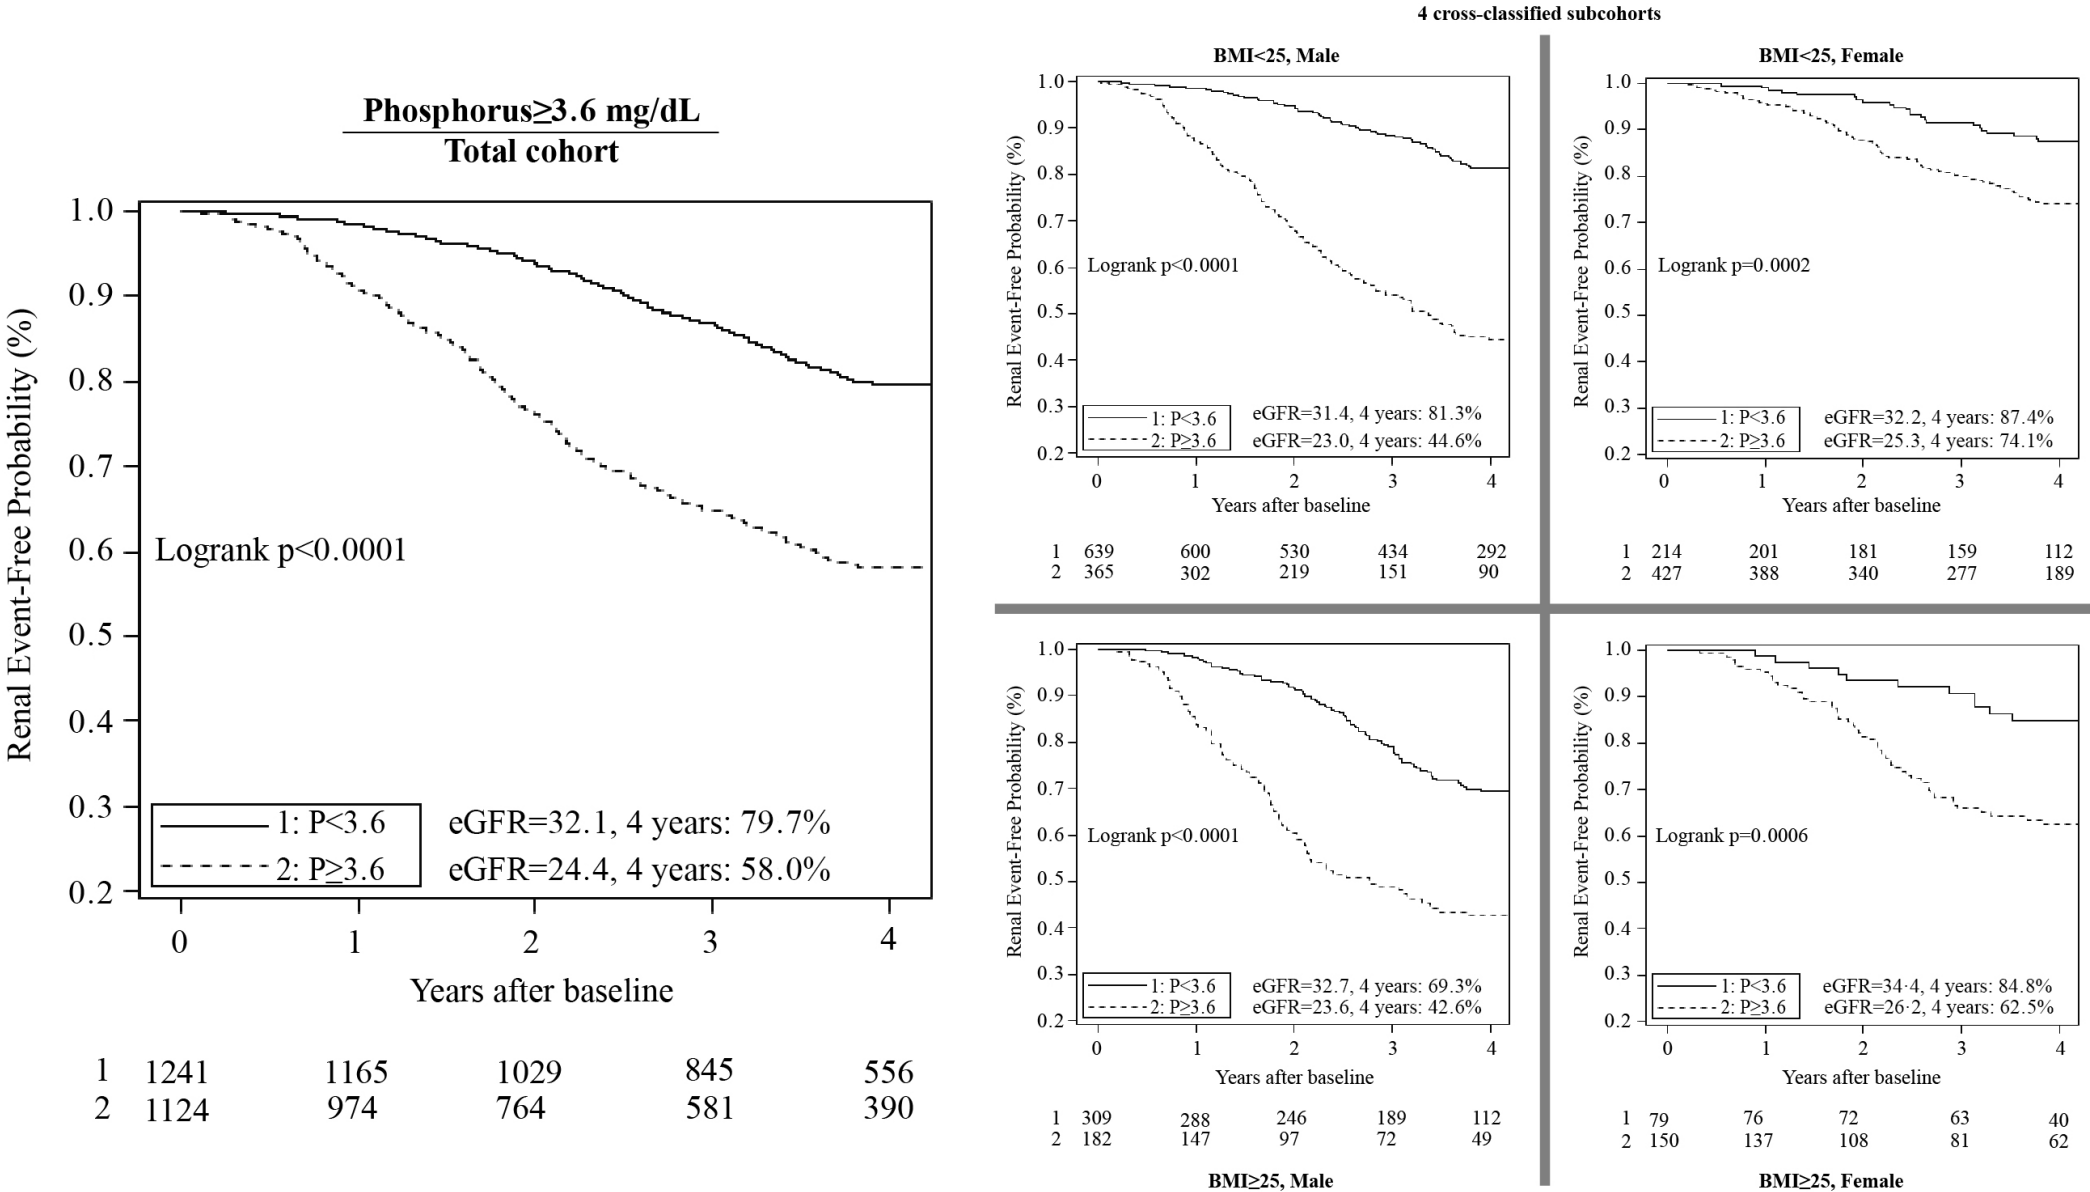

**Appendix Fig. 8F: Kaplan–Meier survival curves stratified by the iPTH cut-off value**

Kaplan–Meier survival curves for renal prognosis stratified by the iPTH cut-off value (determined using the total cohort) are shown for the total cohort (Left side) and four BMI-based four cross-classified subcohorts (Right side). BMI = body mass index; eGFR = baseline estimated glomerular filtration rate (ml/min/1.73 m<sup>2</sup>); 4 years = 4-year survival rate

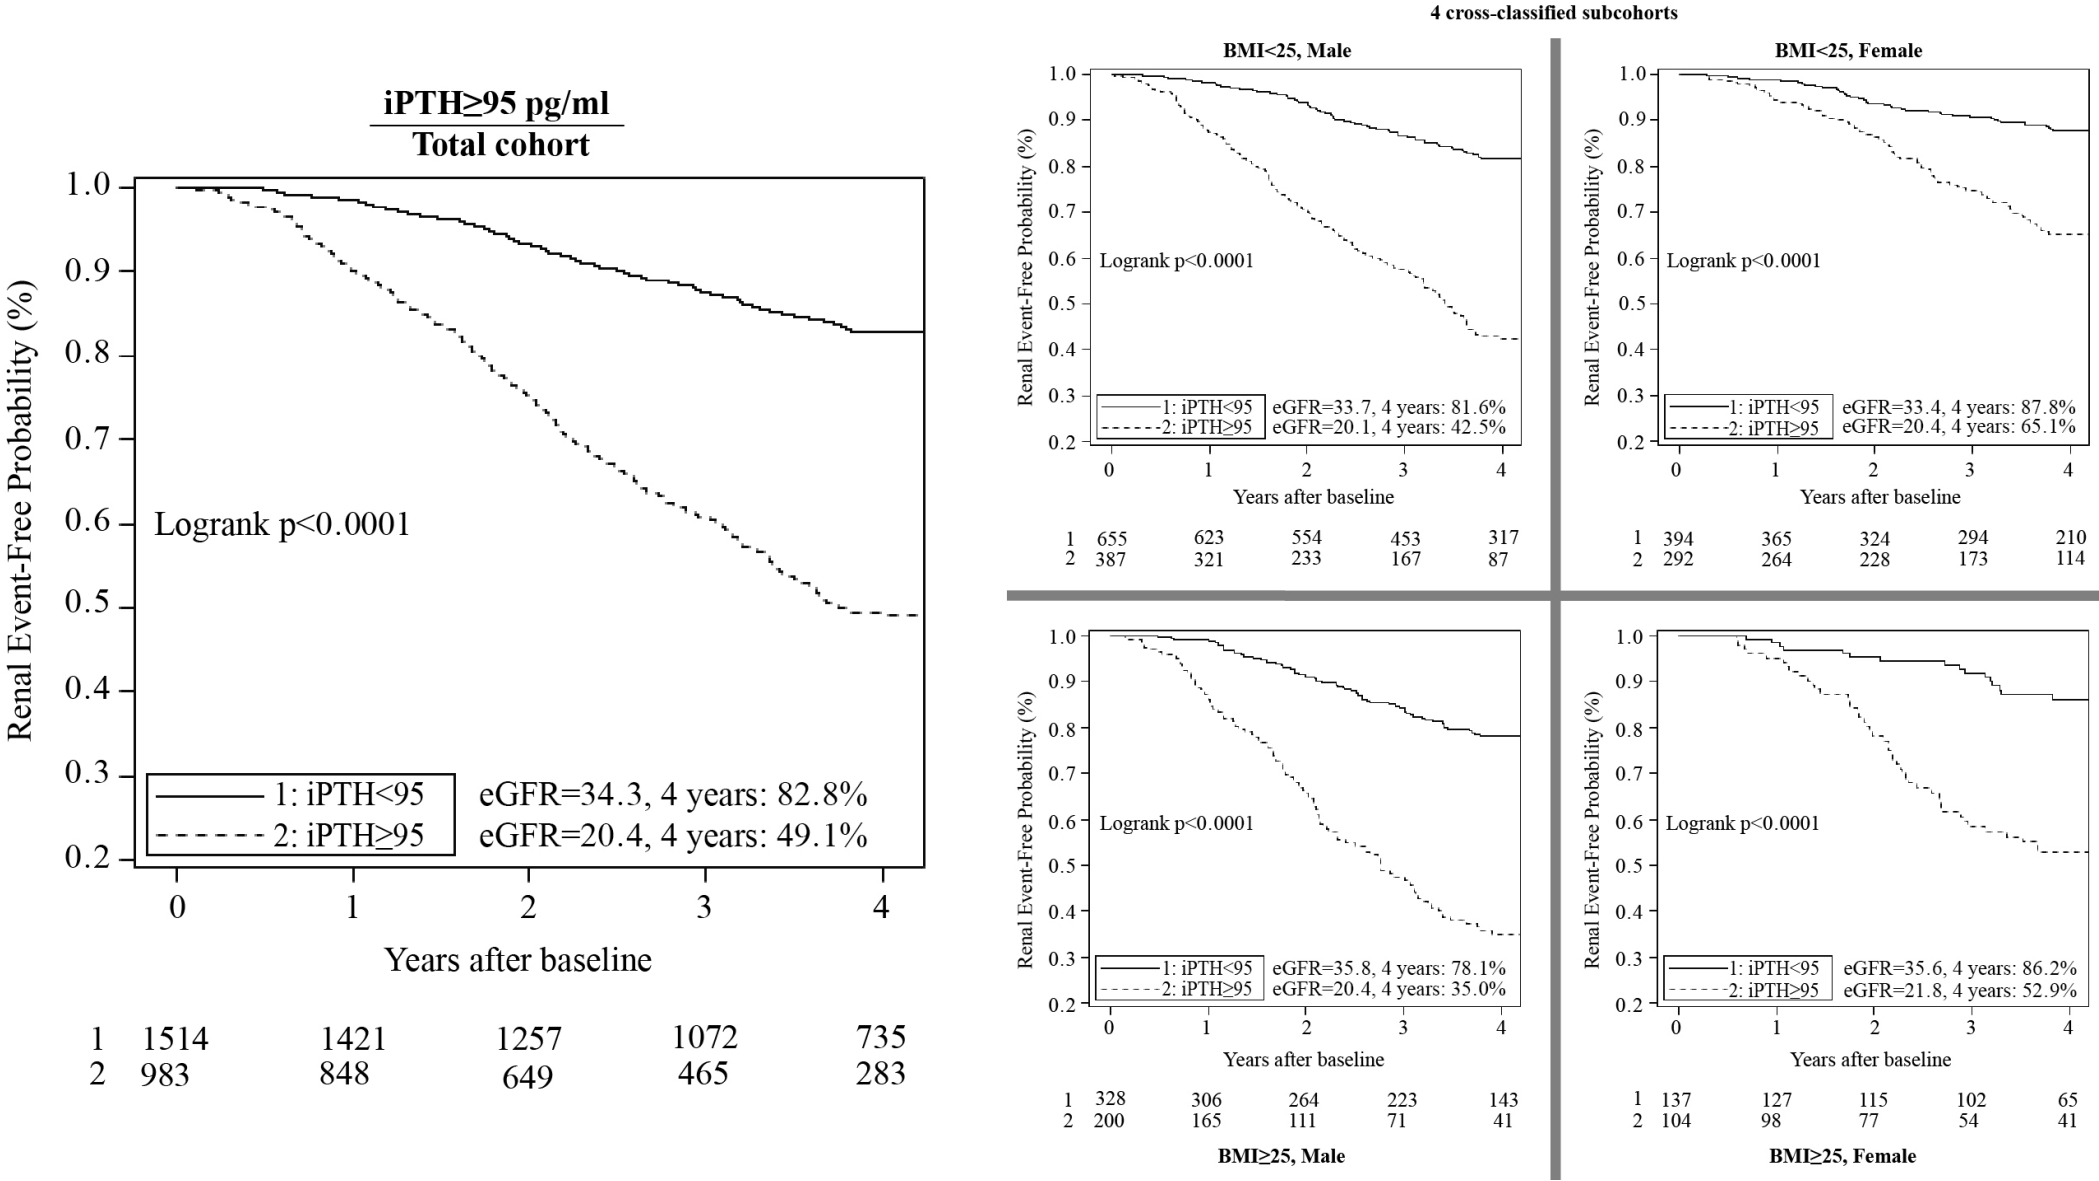



**Appendix Fig. 8G: Kaplan–Meier survival curves stratified by the UACR cut-off value**  
 Kaplan–Meier survival curves for renal prognosis stratified by the UACR cut-off value (determined using the total cohort) for the total cohort (Left side) and four BMI-based four cross-classified subcohorts (Right side). BMI = body mass index; eGFR = baseline estimated glomerular filtration rate (ml/min/1.73 m<sup>2</sup>); 4 years = 4-year survival rate

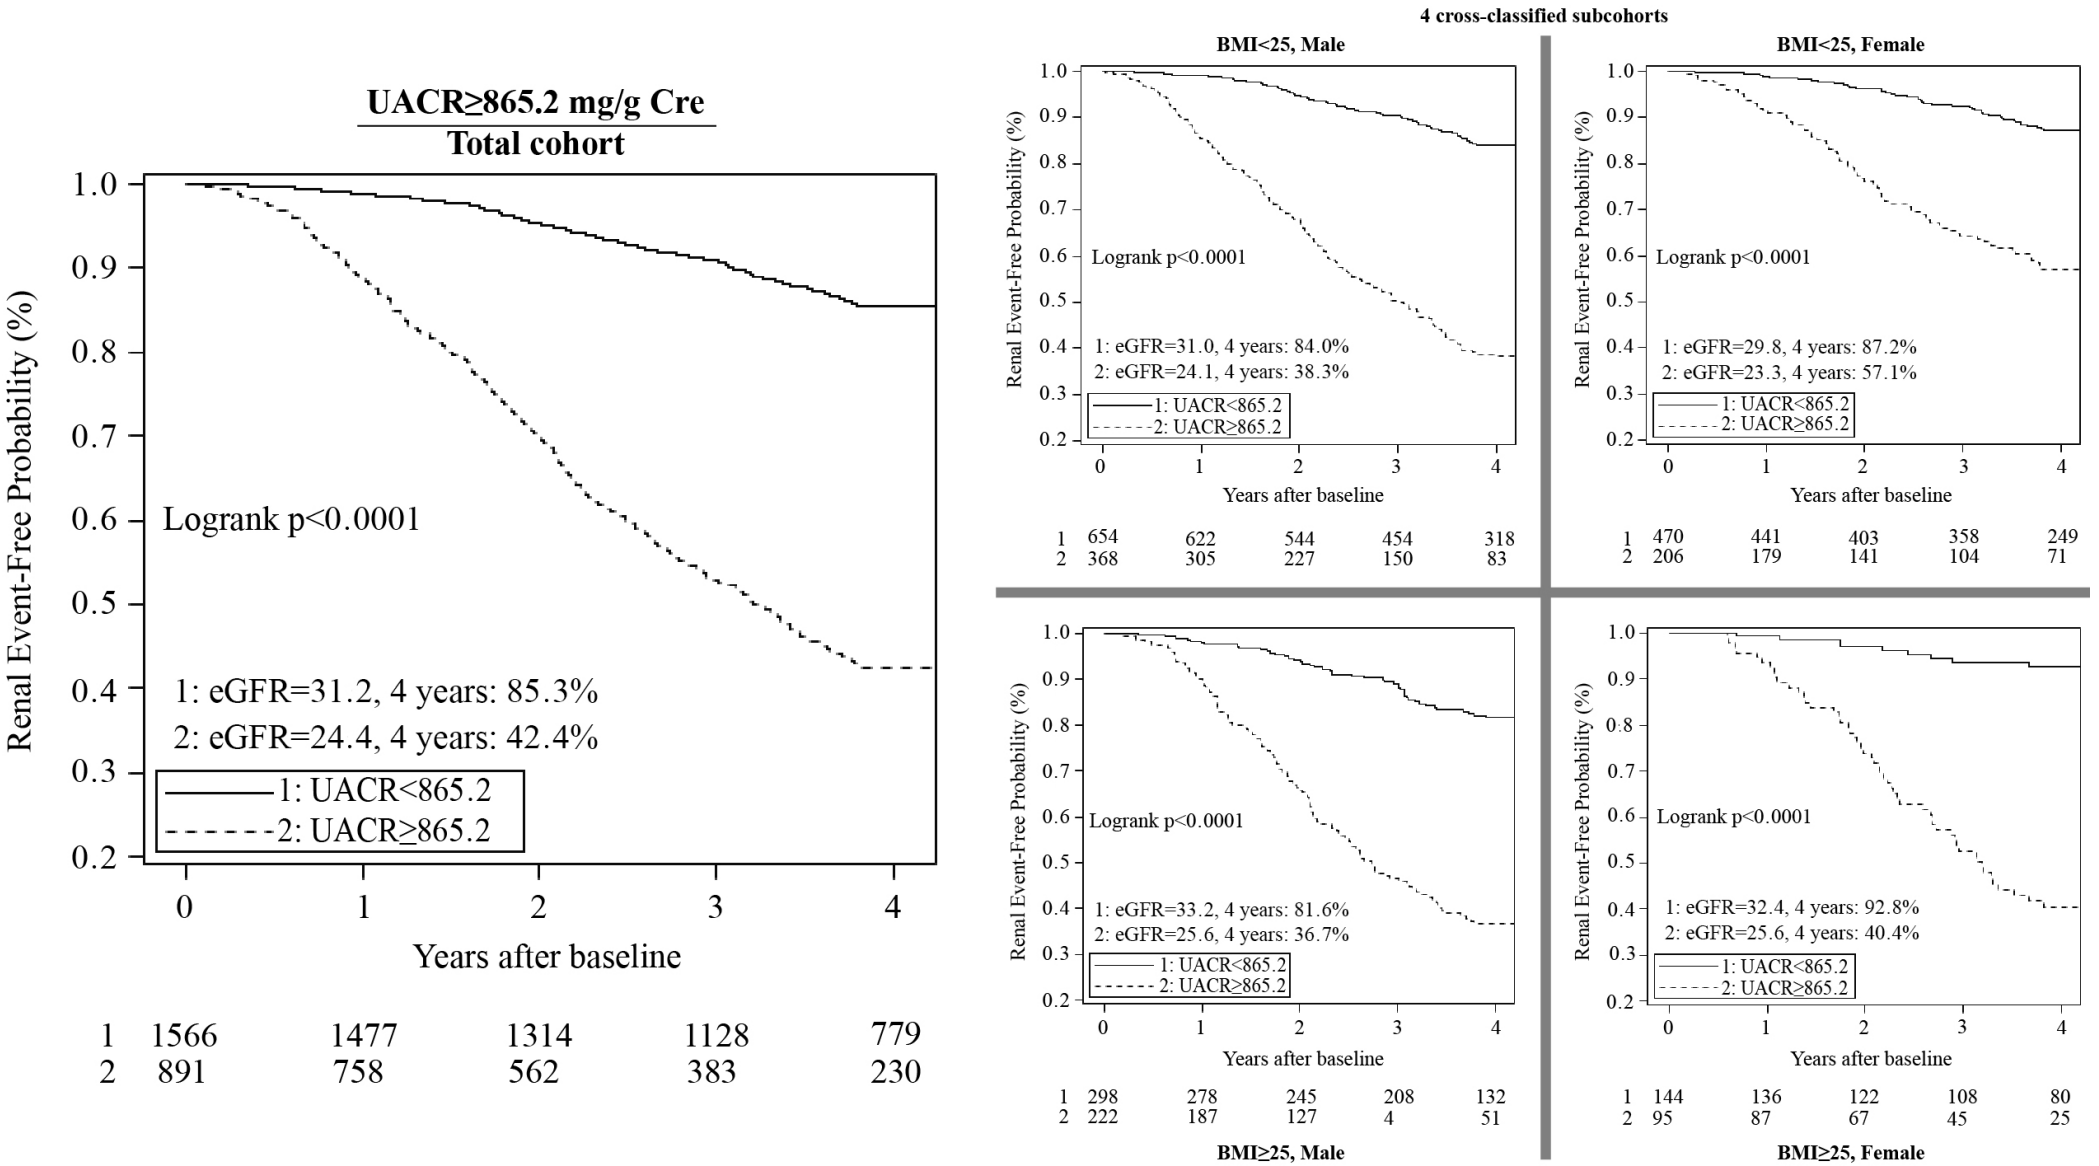

# Appendix Fig. 8H: Kaplan–Meier survival curves stratified by the PP × HR cut-off value

Kaplan–Meier survival curves for renal prognosis stratified by the PP × HR cut-off value (determined using the total cohort) are shown for four BMI-based cross-classified subcohorts. PP × HR = pulse pressure × heart rate product; BMI = body mass index; eGFR = baseline estimated glomerular filtration rate (ml/min/1.73 m<sup>2</sup>); 4 years = 4-year survival rate

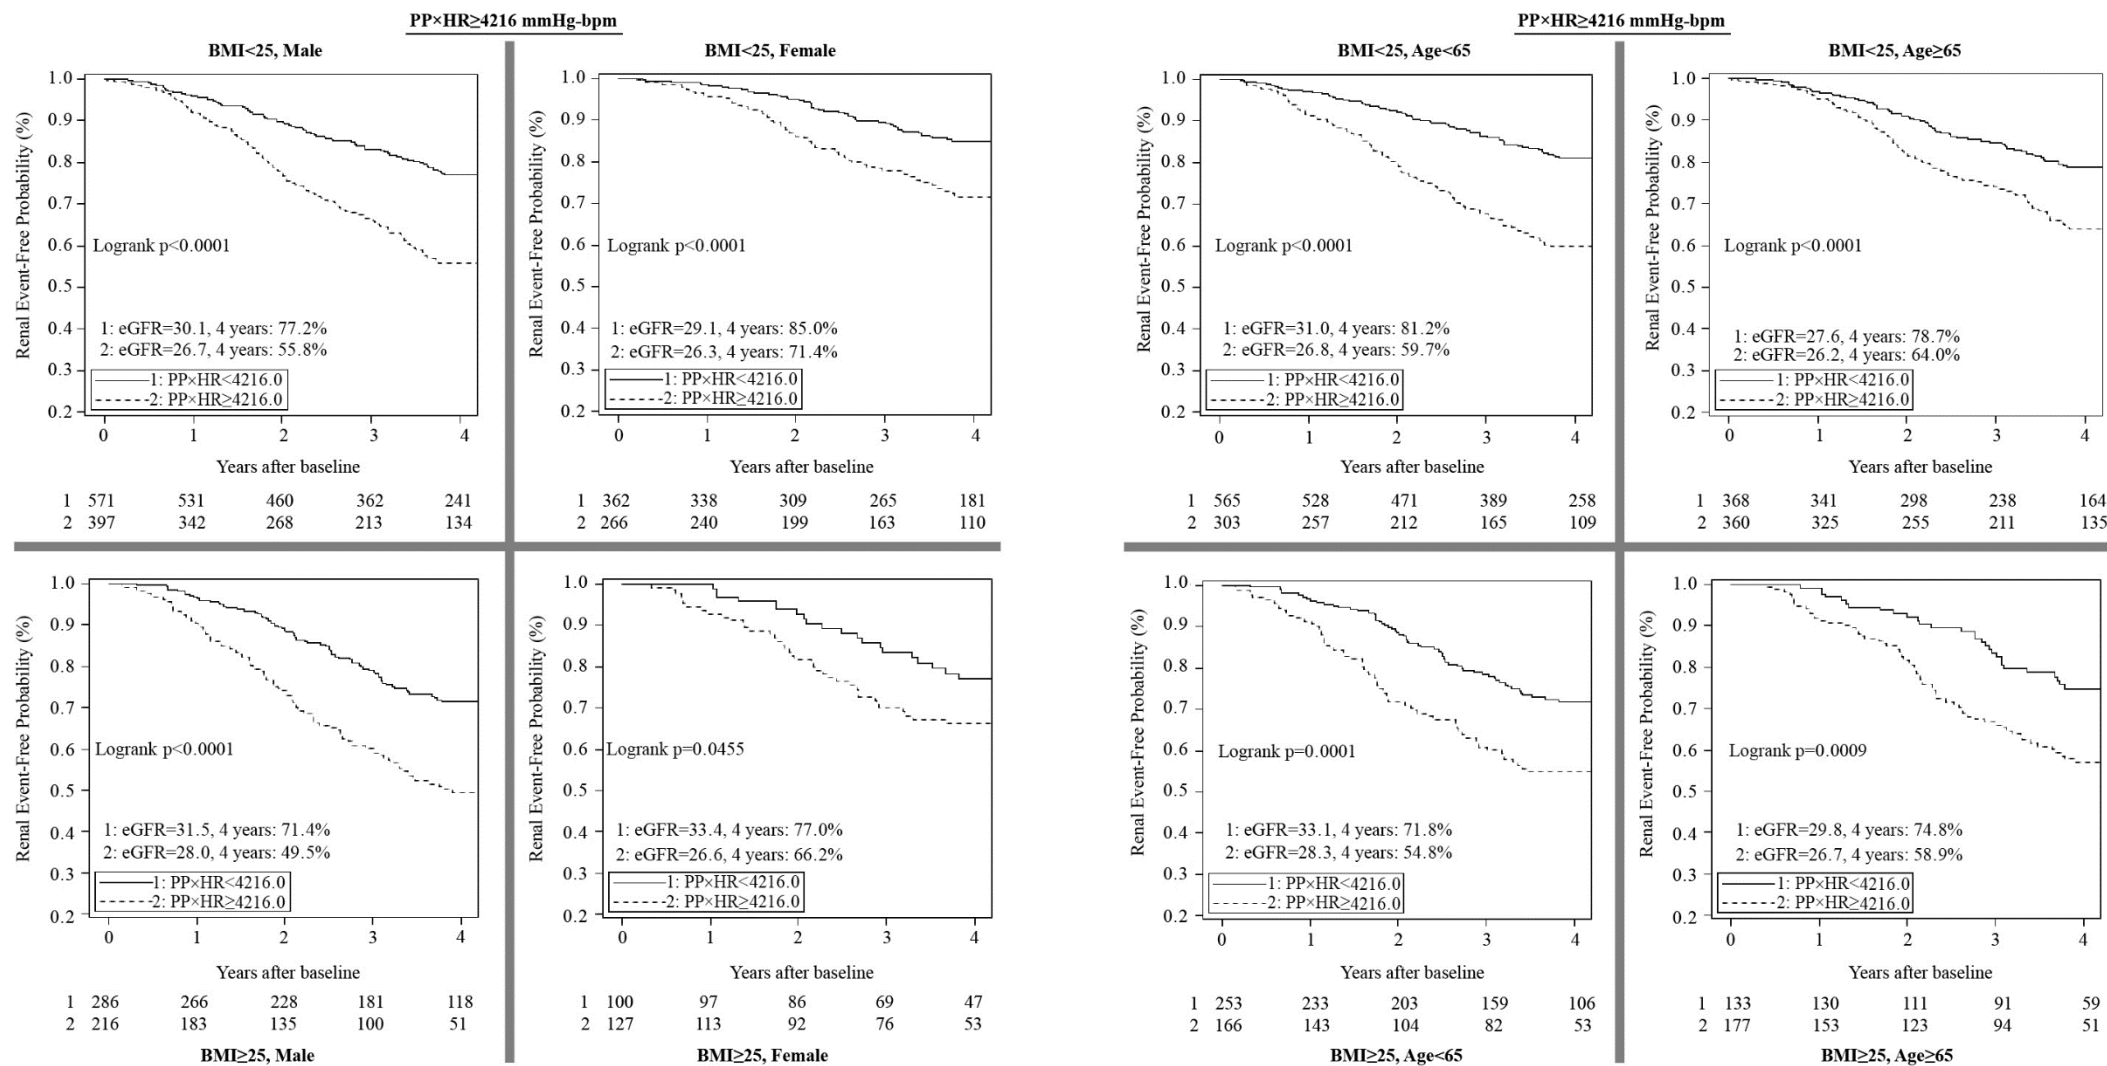

**Appendix Fig. 8I: Kaplan–Meier survival curves stratified by the PP × HR cut-off value (Left side) and the e24hUK cut-off value (Right side)**

Kaplan–Meier survival curves for renal prognosis stratified by the PP × HR cut-off value (determined using the total cohort) and e24hUK cut-off value (determined using the total cohort) are shown for four BMI-based cross-classified subcohorts. PP × HR = pulse pressure × heart rate product; e24hUK = estimated 24-hour urinary potassium excretion; BMI = body mass index; eGFR = baseline estimated glomerular filtration rate (ml/min/1.73 m<sup>2</sup>); DM = diabetes mellitus; 4 years = 4-year survival rate

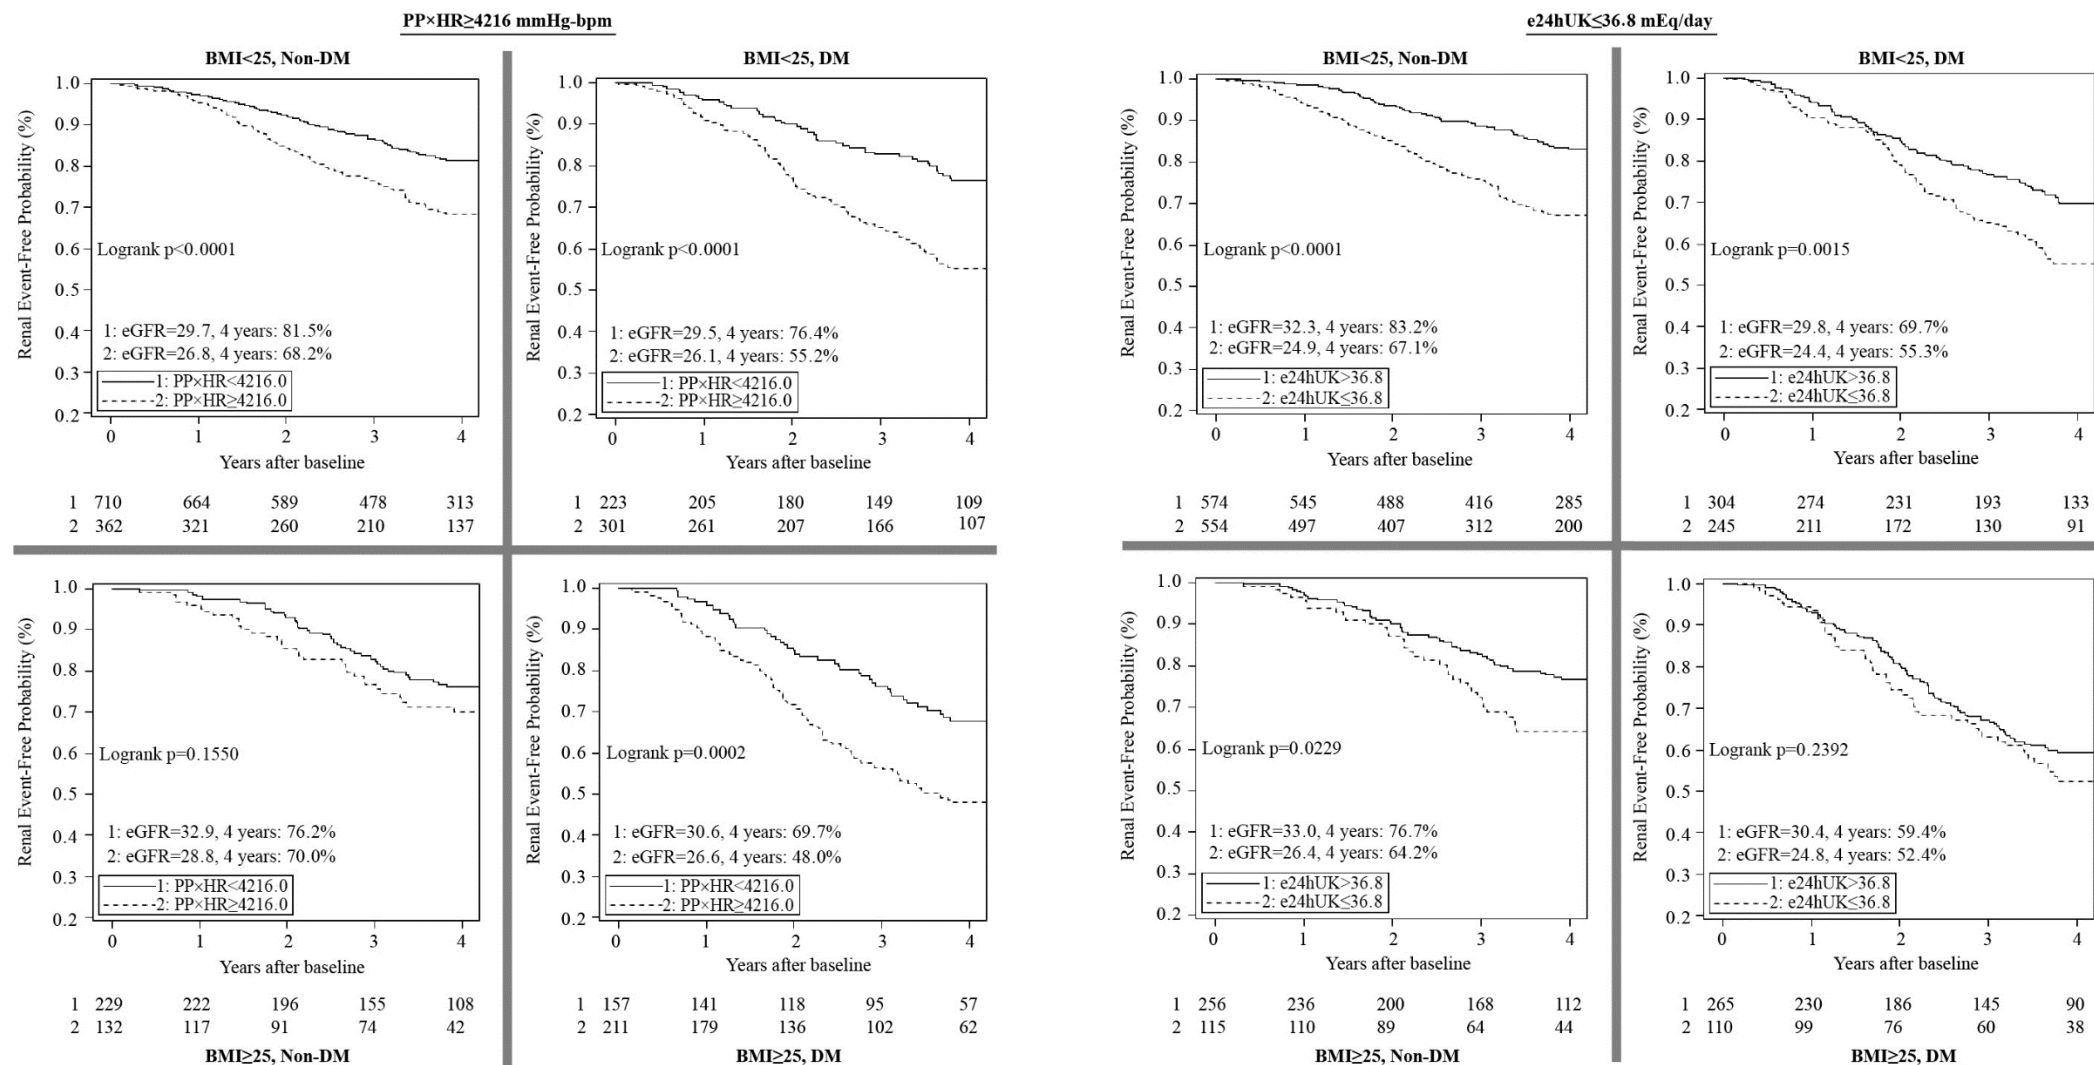

# Appendix Fig. 8J: Kaplan–Meier survival curves stratified by the e24hUK cut-off value

Kaplan–Meier survival curves for renal prognosis stratified by the e24hUK cut-off value (determined using the total cohort) are shown for four BMI-based cross-classified subcohorts. e24hUK = estimated 24-hour urinary potassium excretion; BMI = body mass index; eGFR = baseline estimated glomerular filtration rate (ml/min/1.73 m<sup>2</sup>); 4 years = 4-year survival rate

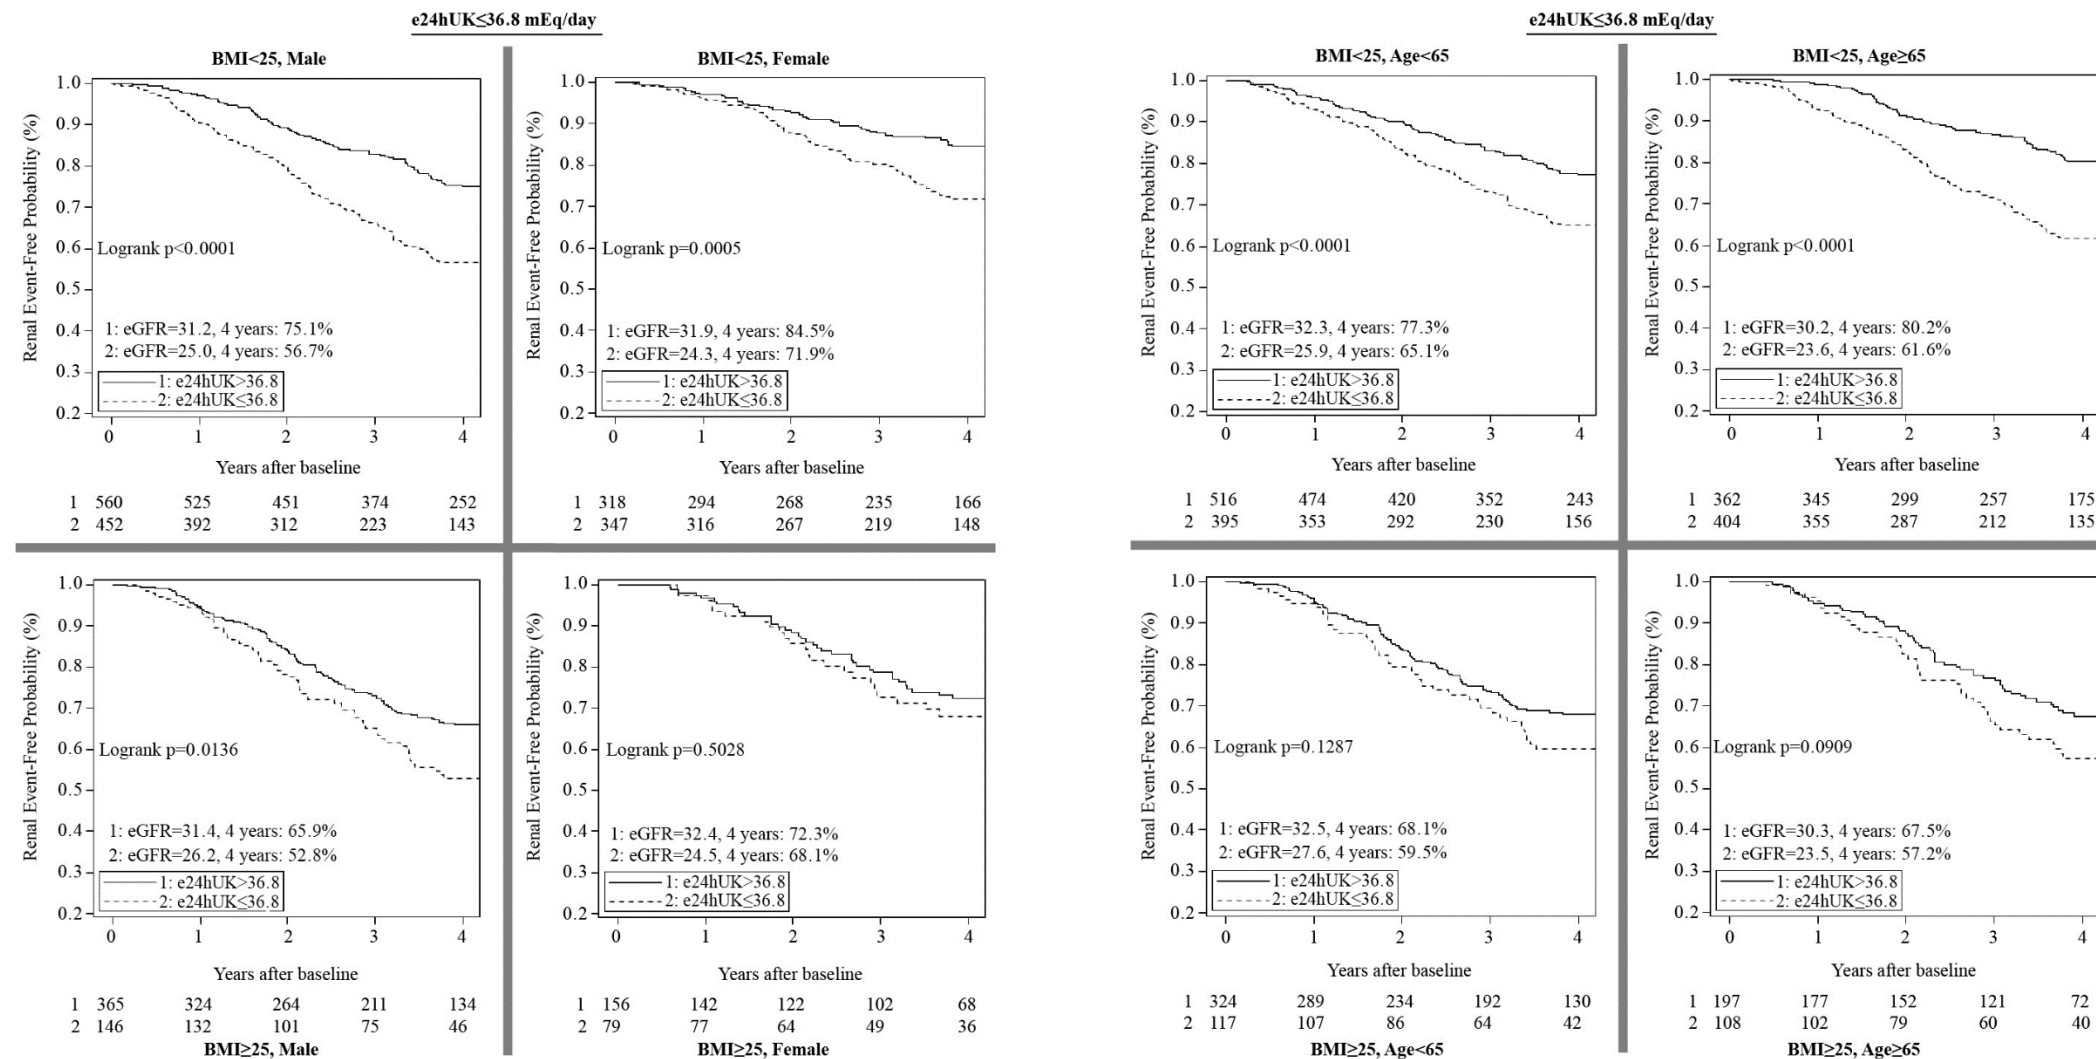

**Appendix Fig. 8K: Kaplan–Meier survival curves stratified by the serum albumin cut-off value**  
 Kaplan–Meier survival curves for renal prognosis stratified by the serum albumin cut-off value (determined using the total cohort) are shown for four BMI-based cross-classified subcohorts. BMI = body mass index; eGFR = baseline estimated glomerular filtration rate (ml/min/1.73 m<sup>2</sup>); 4 years = 4-year survival rate

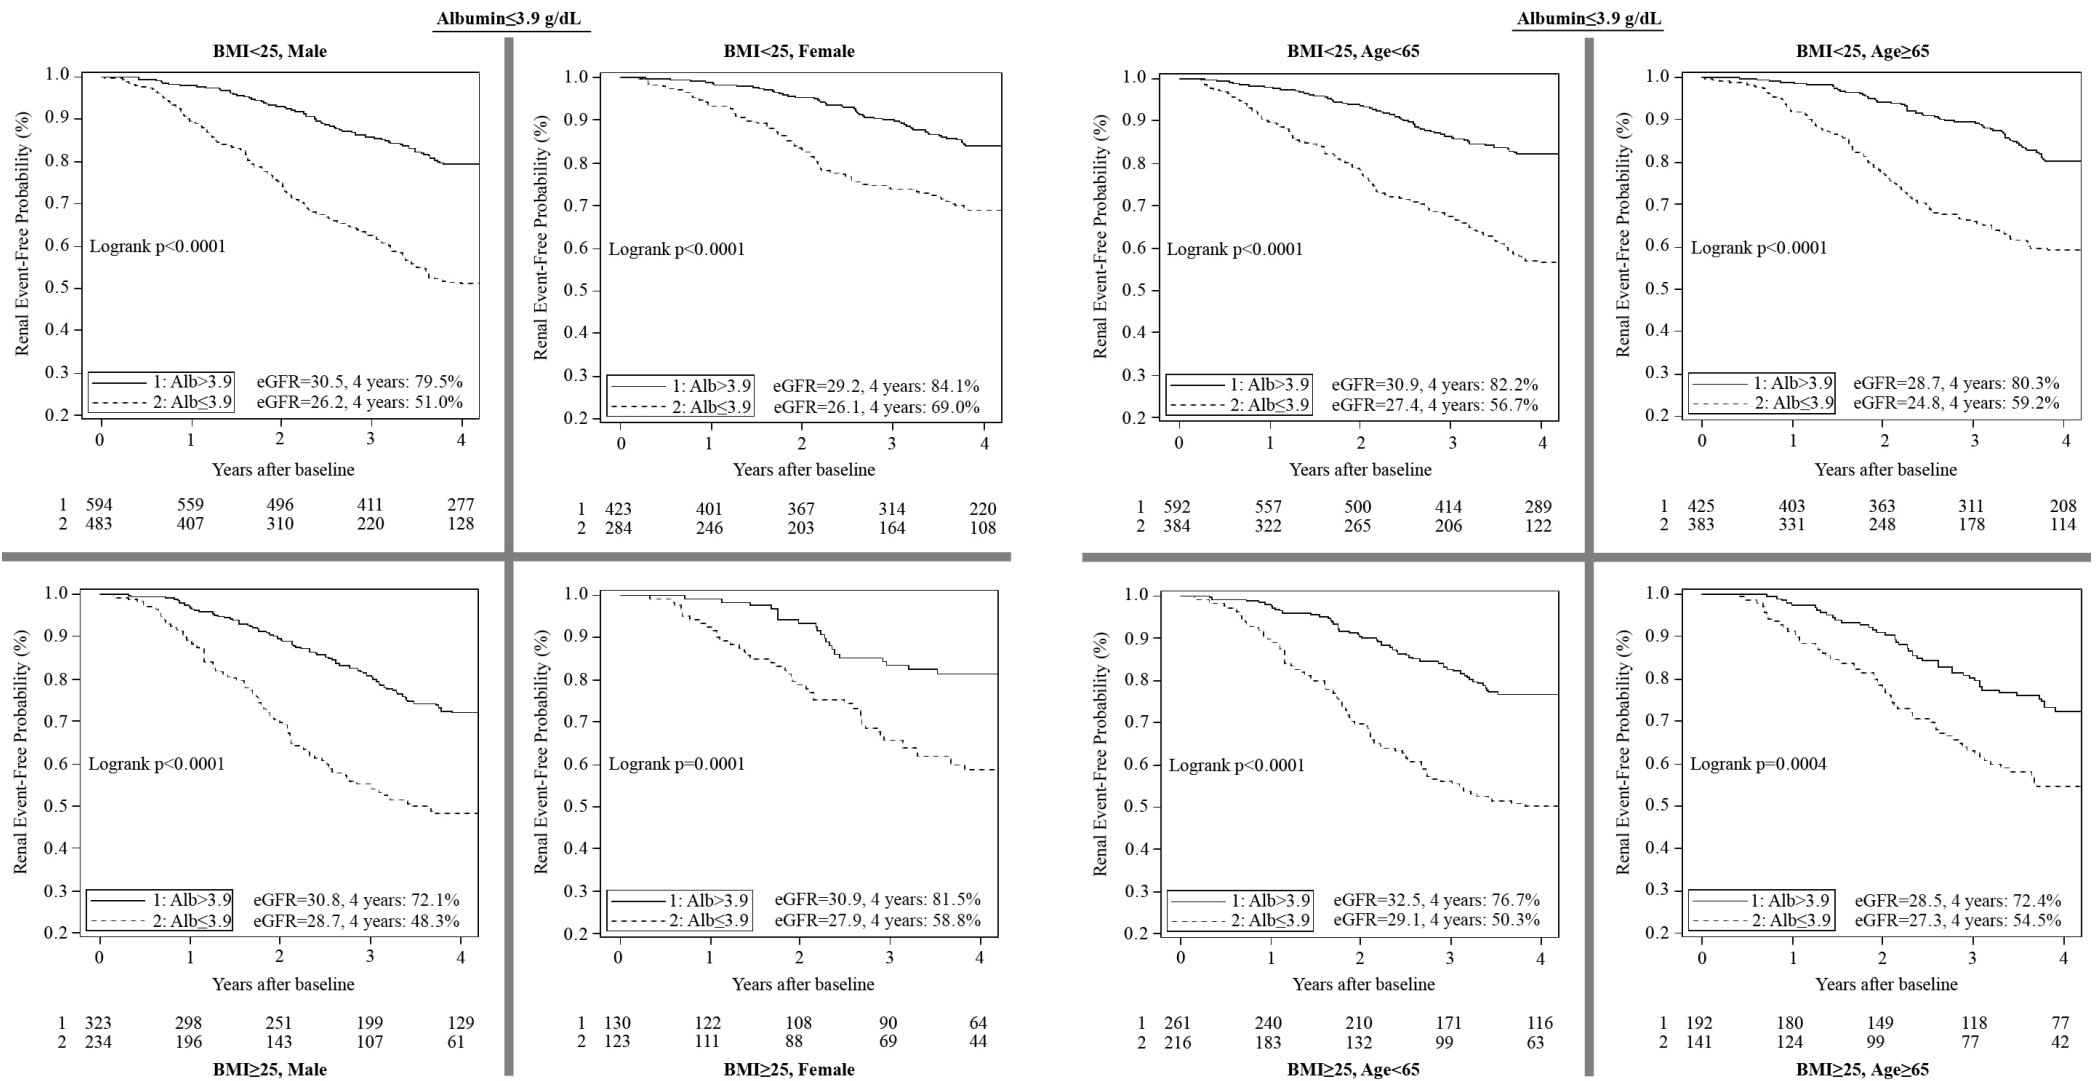

**Appendix Fig. 8L: Kaplan–Meier survival curves stratified by the serum albumin cut-off value (Left side) and the hemoglobin cut-off value (Right side)**

Kaplan–Meier survival curves for renal prognosis stratified by the serum albumin cut-off value (determined using the total cohort) and the hemoglobin cut-off value (determined using the total cohort) are shown for four BMI-based cross-classified subcohorts.

BMI = body mass index; eGFR = baseline estimated glomerular filtration rate (ml/min/1.73 m<sup>2</sup>); CKD = chronic kidney disease; 4 years = 4-year survival rate

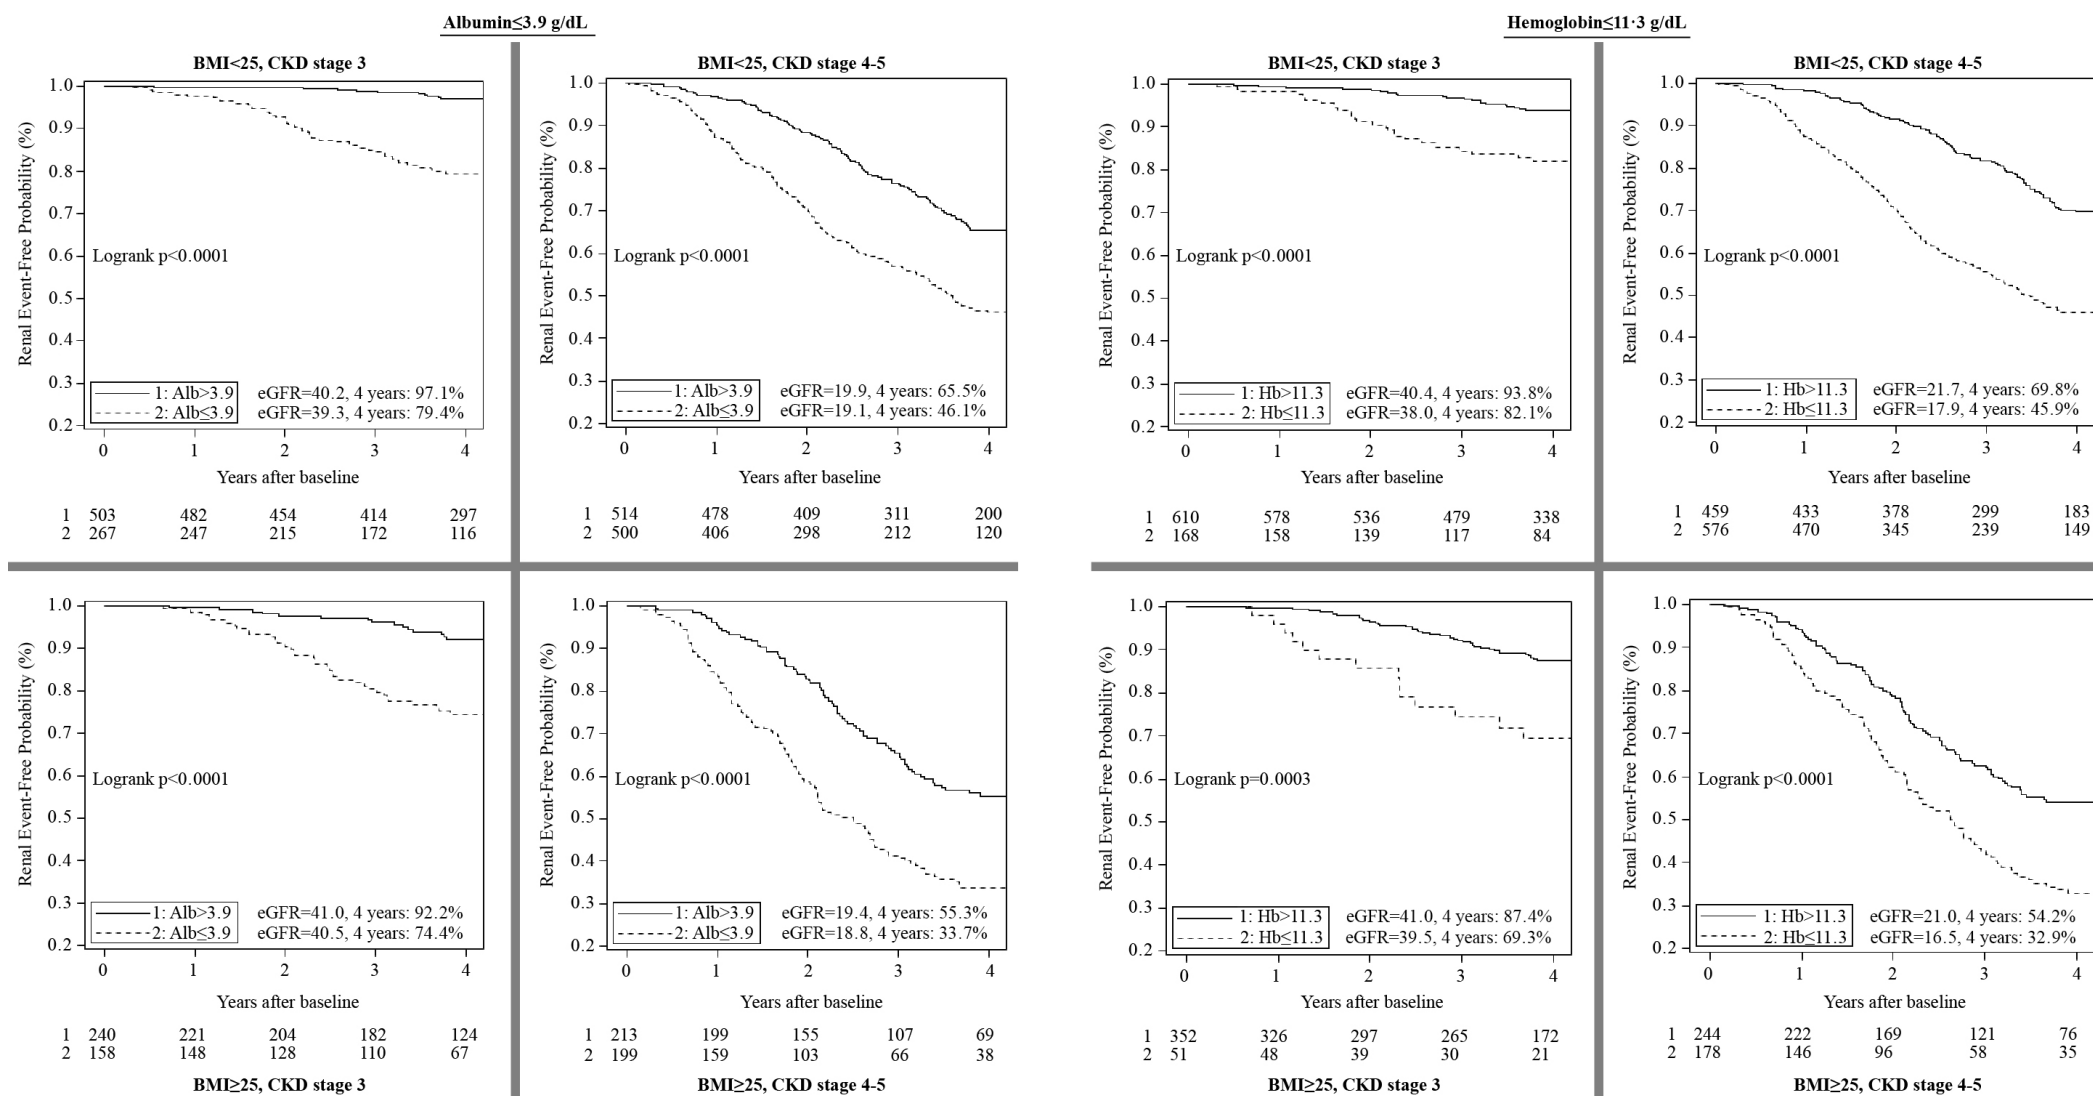

# Appendix Fig. 8M: Kaplan–Meier survival curves stratified by the hemoglobin cut-off value

Kaplan–Meier survival curves for renal prognosis stratified by the hemoglobin cut-off value (determined using the total cohort) are shown four BMI-based cross-classified subcohorts.

BMI = body mass index; eGFR = baseline estimated glomerular filtration rate (ml/min/1.73 m<sup>2</sup>); DM = diabetes mellitus; 4 years = 4-year survival rate

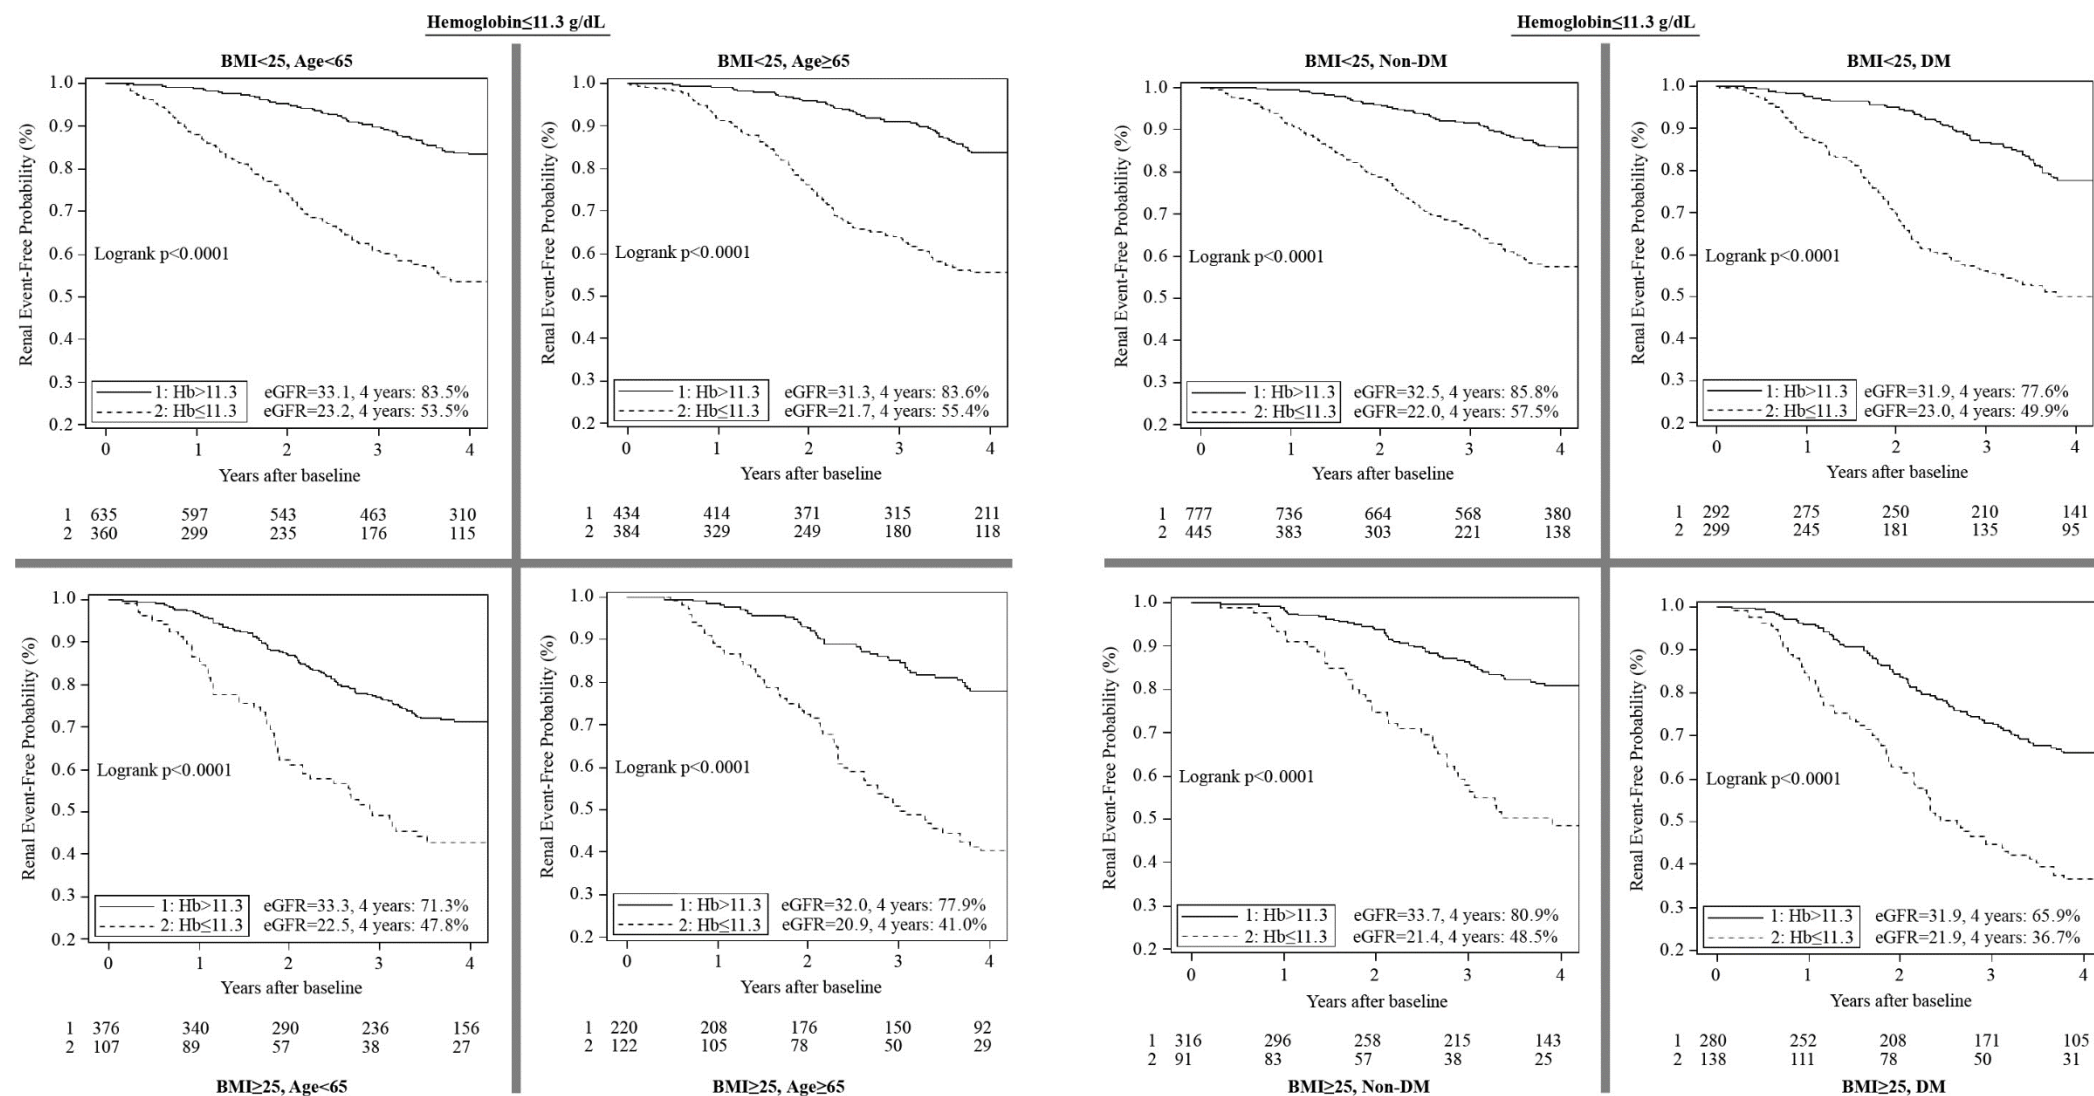

# Appendix Fig. 8N: Kaplan–Meier survival curves stratified by the serum phosphorous cut-off value

Kaplan–Meier survival curves for renal prognosis stratified by the serum phosphorous cut-off value (determined using the total cohort) are shown for four BMI-based cross-classified subcohorts. BMI = body mass index; eGFR = baseline estimated glomerular filtration rate (ml/min/1.73 m<sup>2</sup>); CKD = chronic kidney disease; DM = diabetes mellitus; 4 years = 4-year survival rate

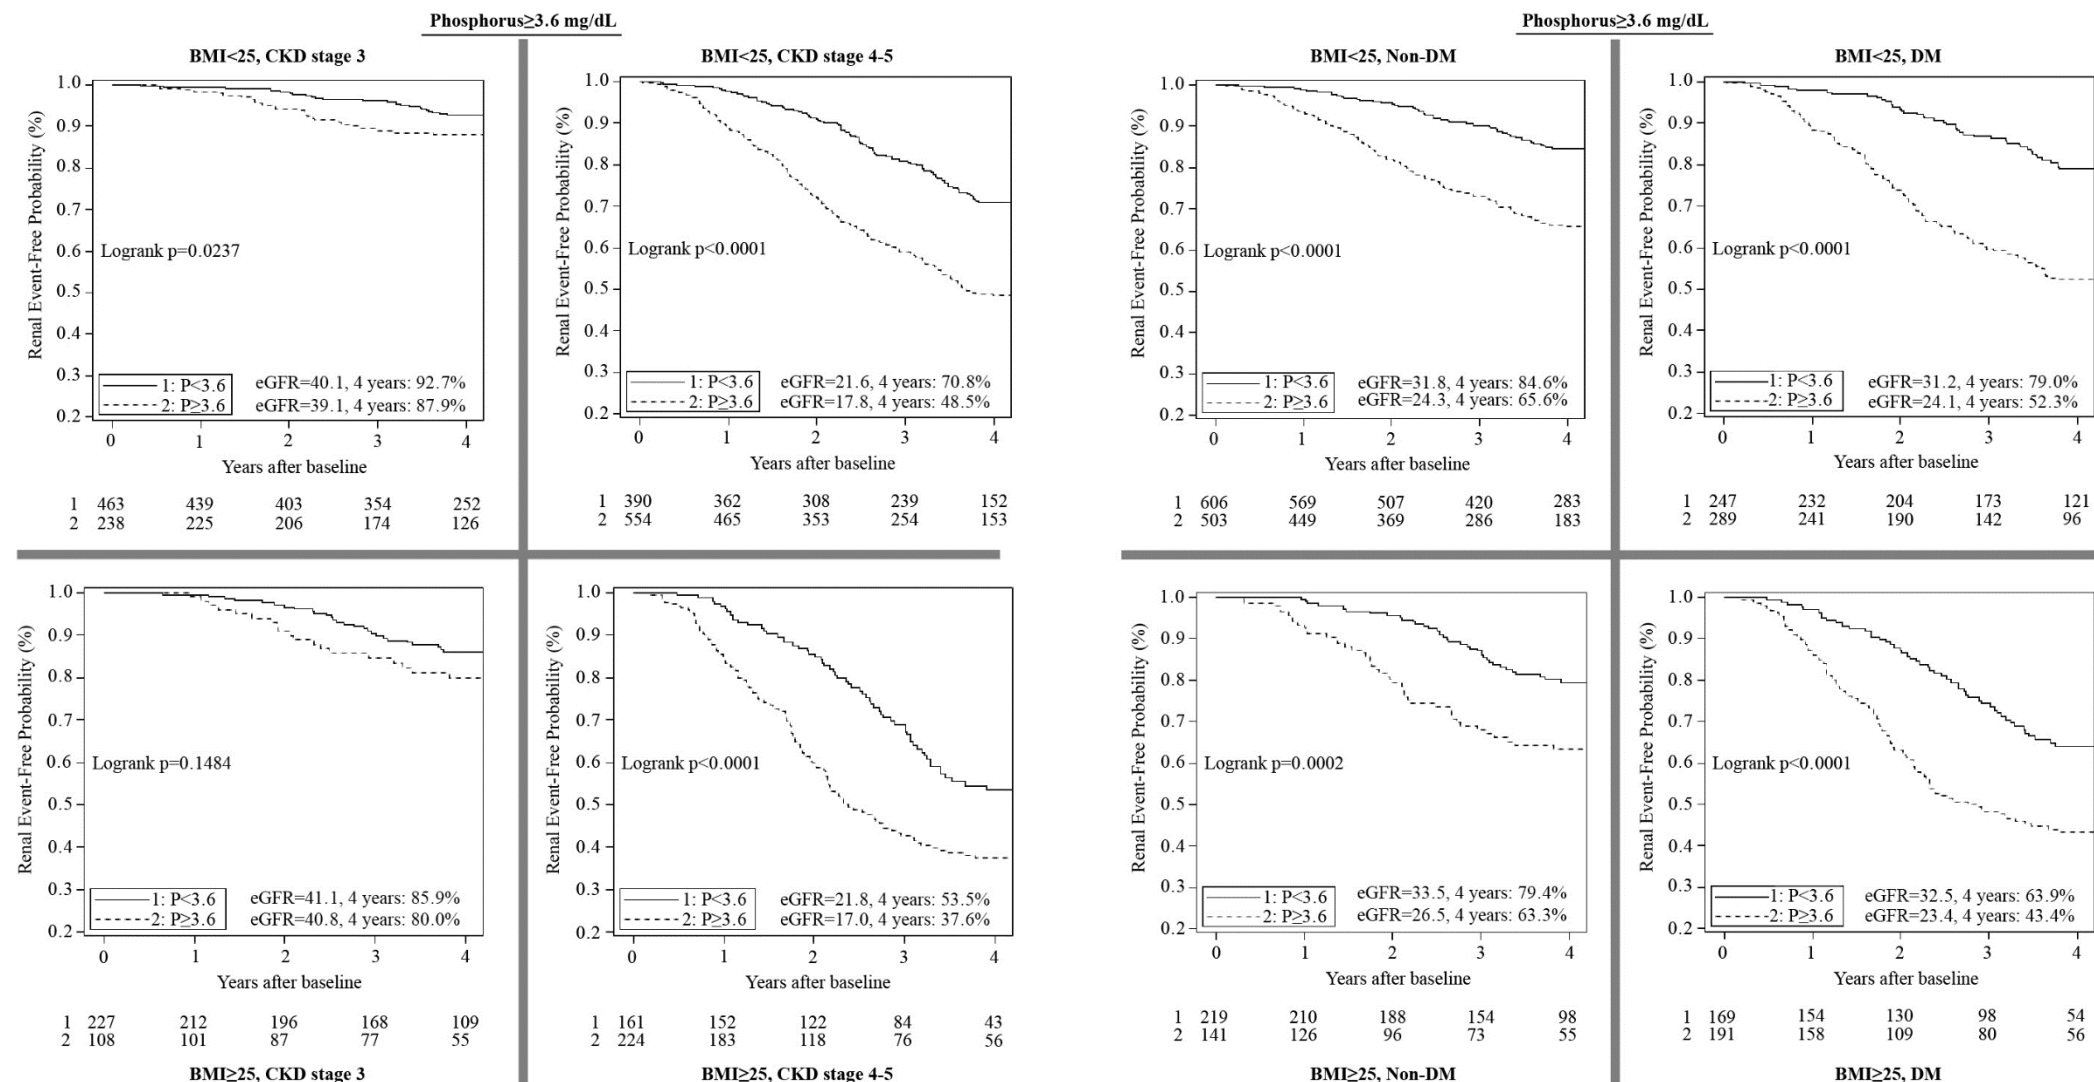



**Appendix Fig. 8O: Kaplan–Meier survival curves stratified by the serum phosphorous cut-off value (Left side) and the iPTH cut-off value (Right side)**

Kaplan–Meier survival curves for renal prognosis stratified by the serum albumin cut-off value (determined using the total cohort) and iPTH cut-off value (determined using the total cohort) are shown for four BMI-based cross-classified subcohorts.

BMI = body mass index; eGFR = baseline estimated glomerular filtration rate (ml/min/1.73 m<sup>2</sup>); iPTH = intact parathyroid hormone; 4 years = 4-year survival rate

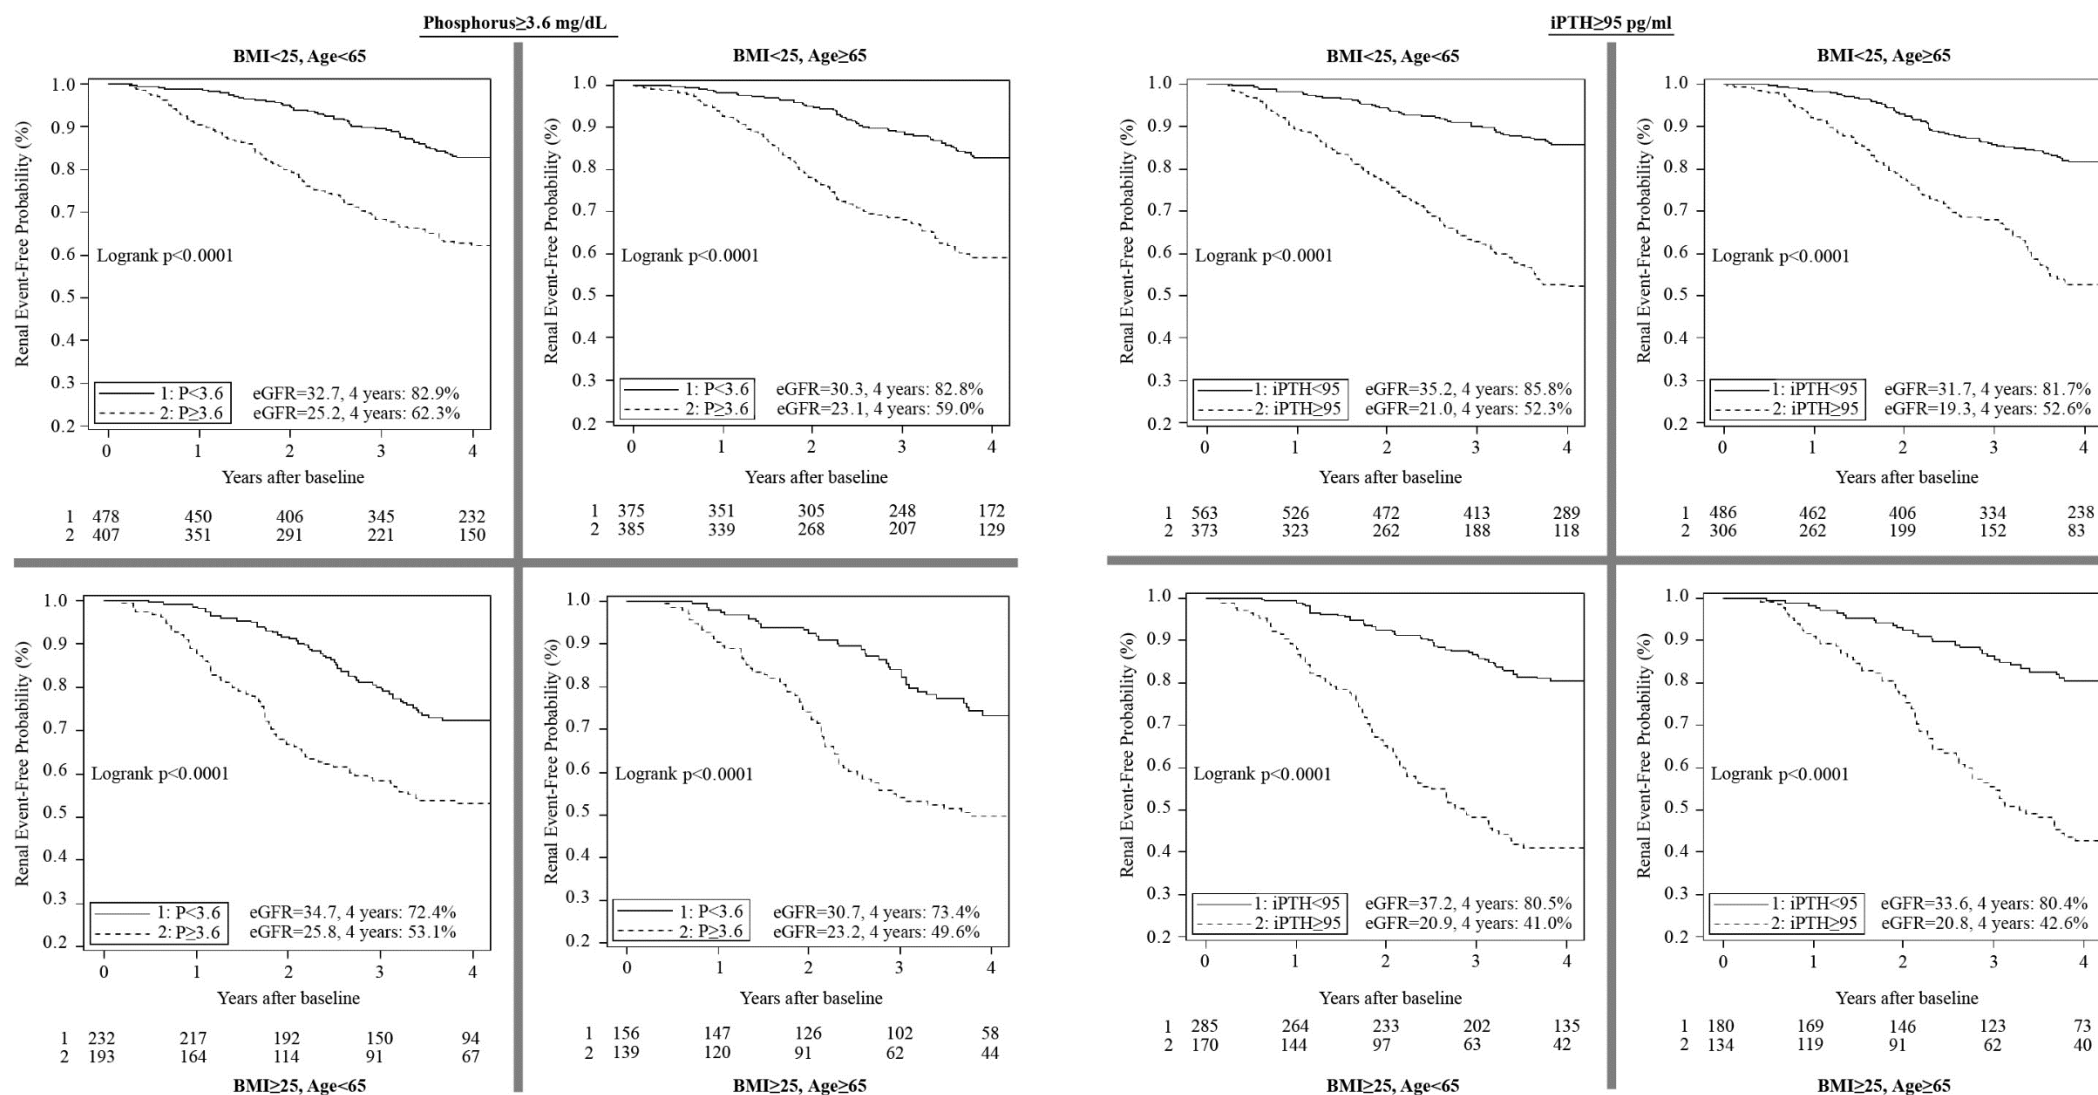

# Appendix Fig. 8P: Kaplan–Meier survival curves stratified by the iPTH cut-off value

Kaplan–Meier survival curves for renal prognosis stratified by the iPTH cut-off value (determined using the total cohort) are shown for four BMI-based cross-classified subcohorts. BMI = body mass index; eGFR = baseline estimated glomerular filtration rate (ml/min/1.73 m<sup>2</sup>); iPTH = intact parathyroid hormone; CKD = chronic kidney disease; 4 years = 4-year survival rate

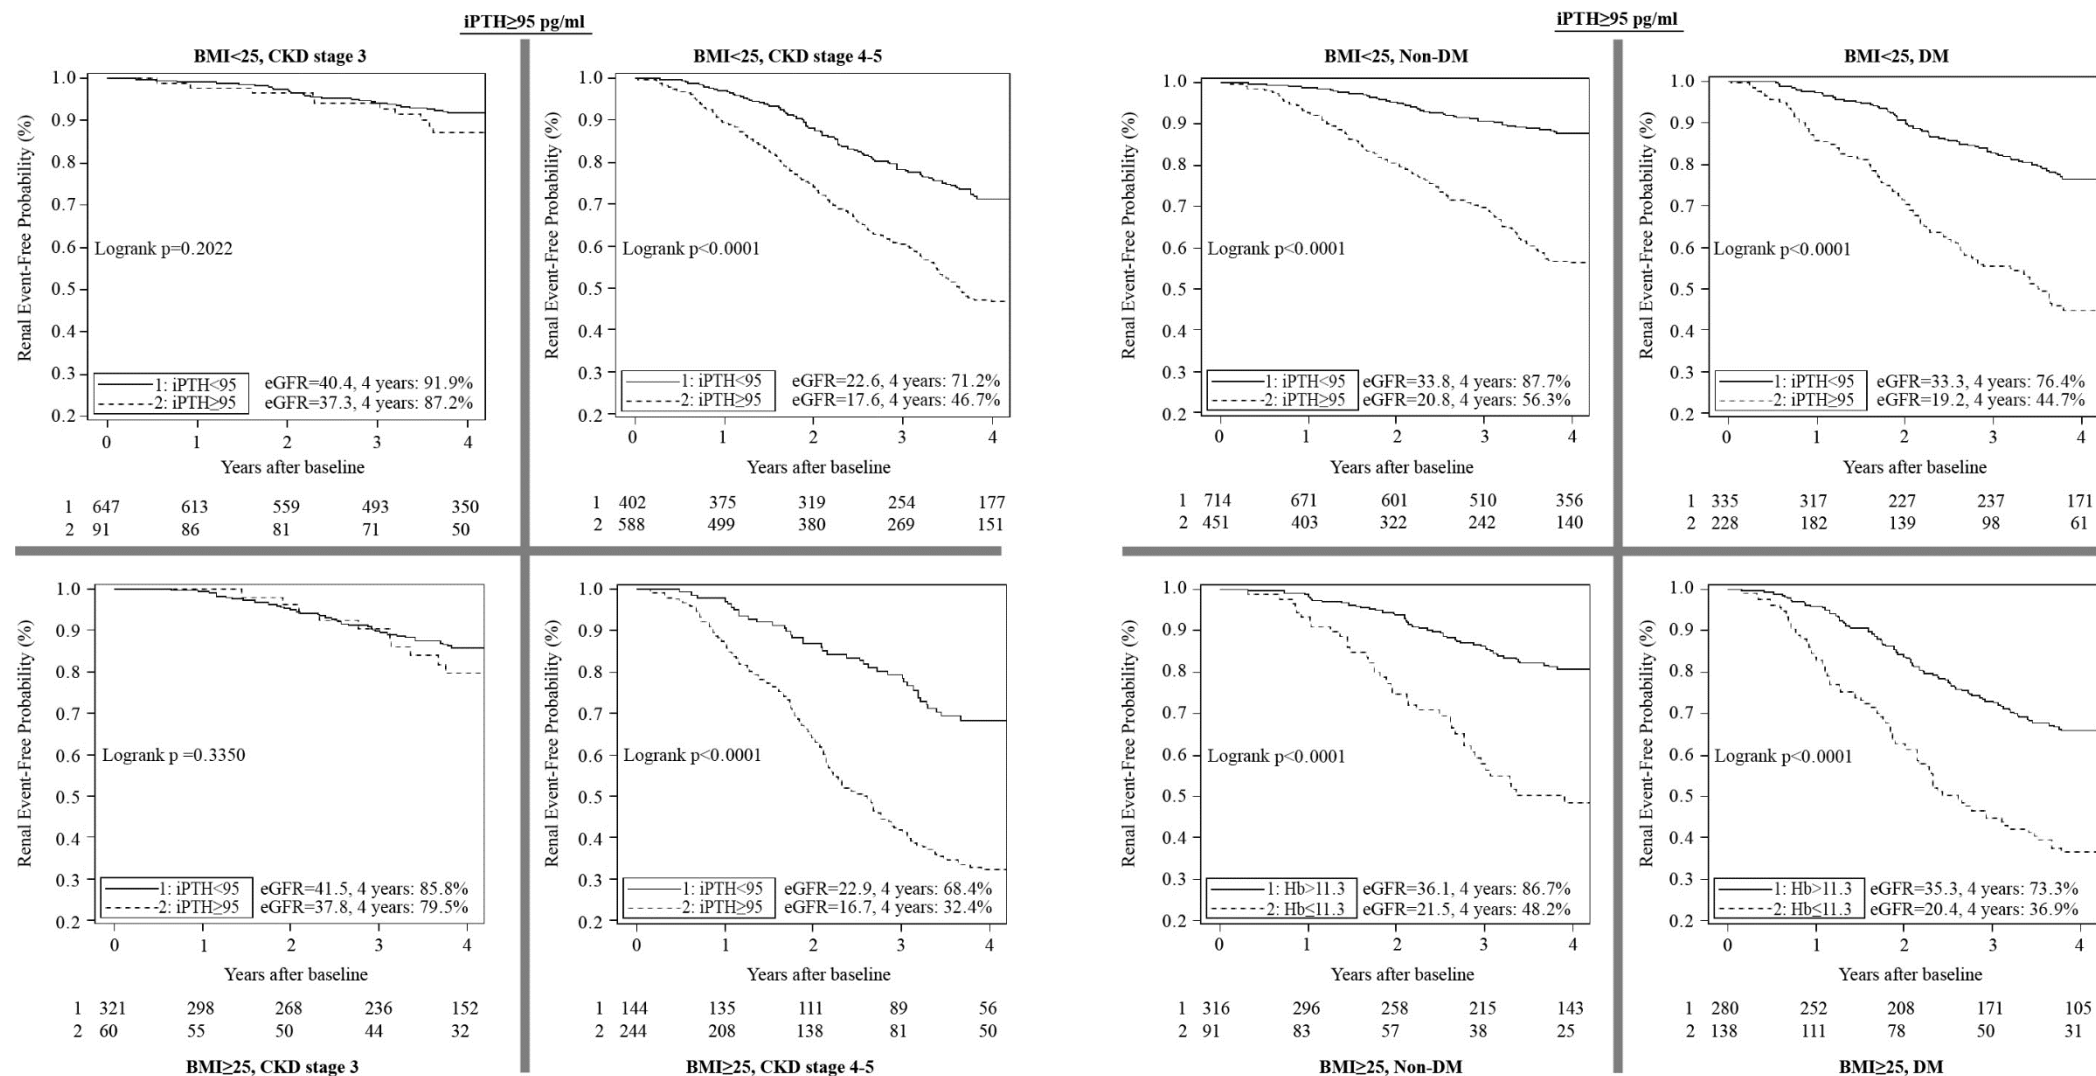

**Appendix Fig. 8Q: Kaplan–Meier survival curves stratified by the UACR cut-off value**

Kaplan–Meier survival curves for renal prognosis stratified by the UACR cut-off value (determined using the total cohort) for four BMI-based four cross-classified subcohorts. UACR = urine albumin-to-creatinine ratio; BMI = body mass index; eGFR = baseline estimated glomerular filtration rate (ml/min/1.73 m<sup>2</sup>); CKD = chronic kidney disease; 4 years = 4-year survival rate

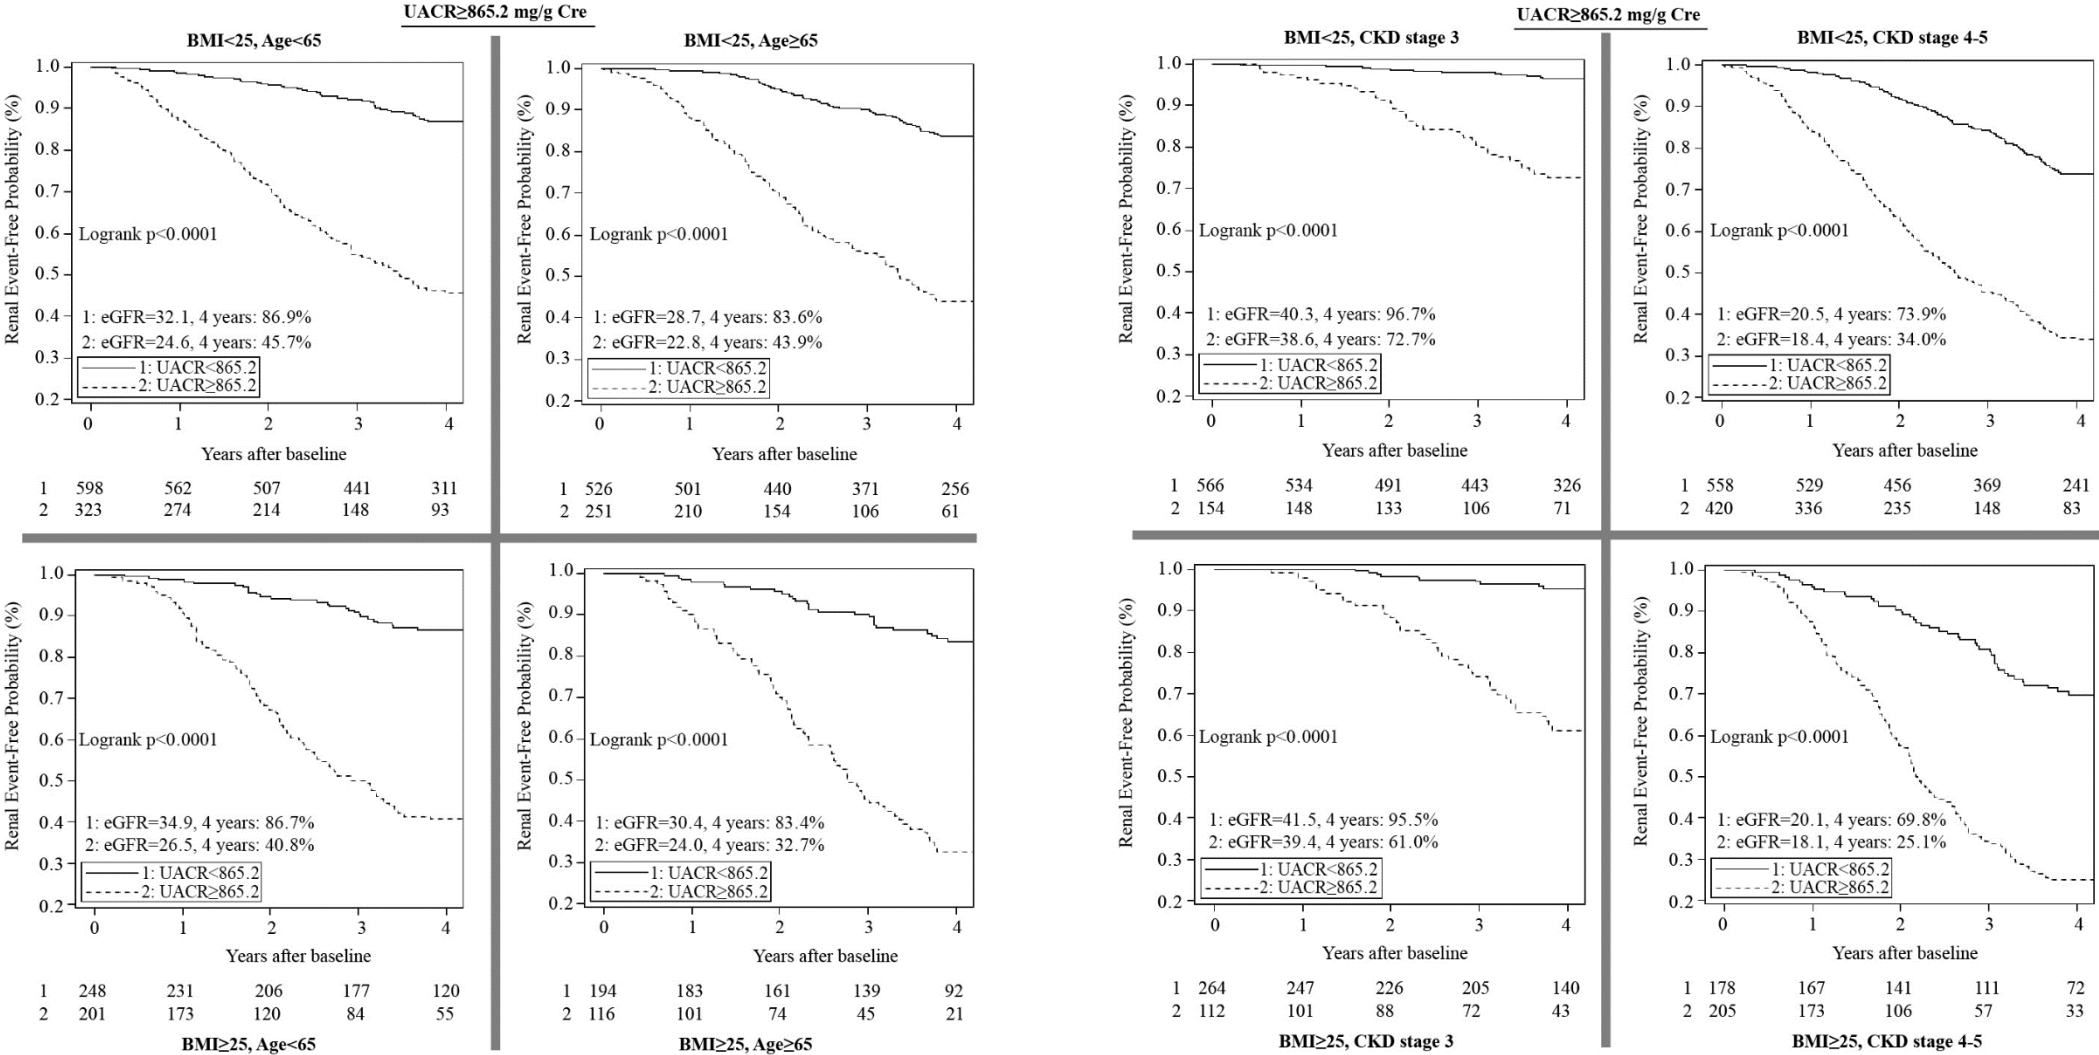

**Appendix Fig. 8R: Kaplan–Meier survival curves stratified by the UACR cut-off value**

Kaplan–Meier survival curves for renal prognosis stratified by the UACR cut-off value (determined using the total cohort) for four BMI-based four cross-classified subcohorts. UACR = urine albumin-to-creatinine ratio; BMI = body mass index; eGFR = baseline estimated glomerular filtration rate (ml/min/1.73 m<sup>2</sup>); DM = diabetes mellitus; 4 years = 4-year survival rate

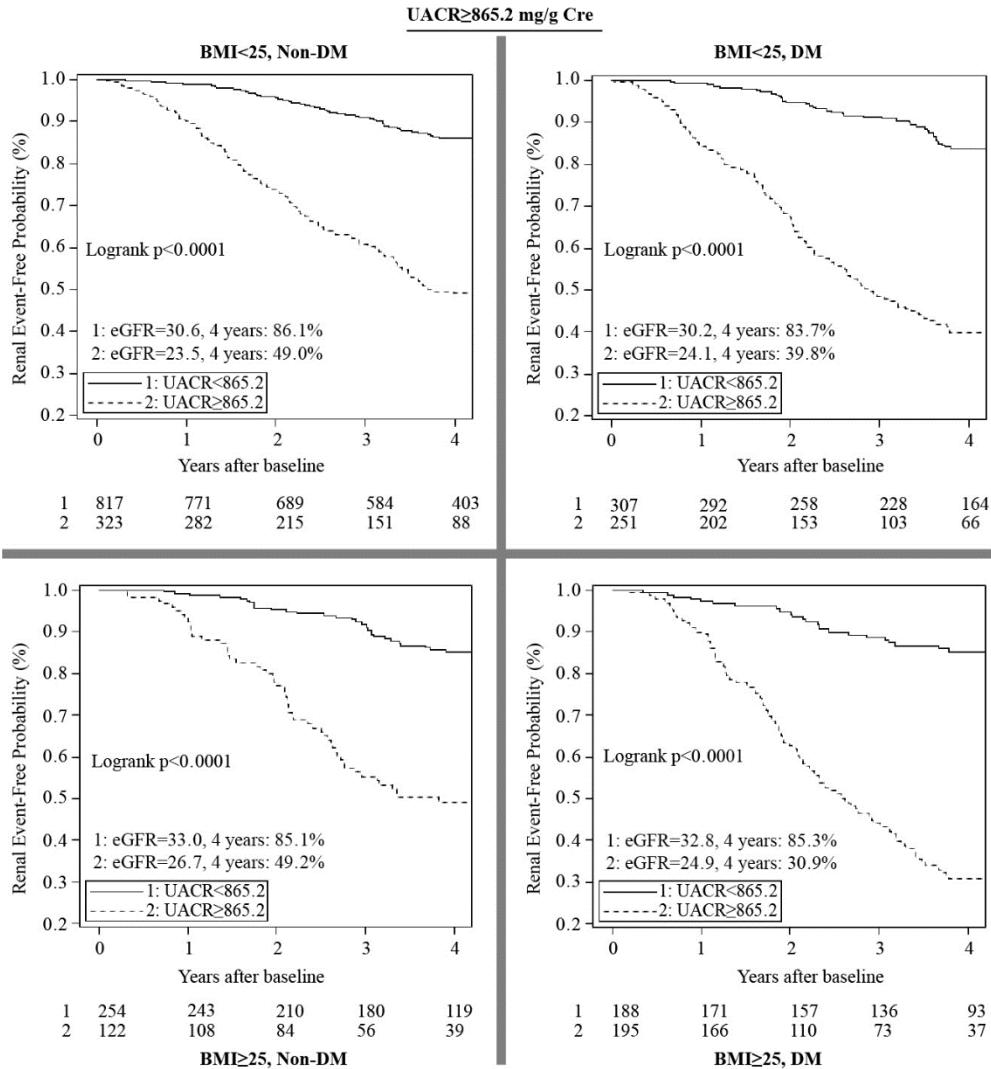

# Appendix Fig. 9A: Diagnostic odds ratios and PP × HR and e24hUK cut-off values according to subcohort

A summary of [Appendix Table 8](#) is depicted. Diagnostic odds ratios (DORs) and cut-off values for a decline in eGFR by  $\geq 50\%$  from baseline or end-stage renal disease during the follow-up examination period are shown according to subcohort for PP × HR (A) and e24hUK (B). In all cohorts, cut-off values were determined by ROC analyses. The asterisk reflects the DOR for the total cohort. For each subcohort, the DOR is represented by a circle, and the horizontal line crossing the circle represents the 95% confidence interval. Circle size is proportional to the number in each subcohort. BMI = body mass index; CKD = chronic kidney disease; DM = diabetes mellitus; PP × HR = pulse pressure × heart rate product; e24hUK = estimated 24-hour urinary potassium excretion; ROC = receiver operating characteristics

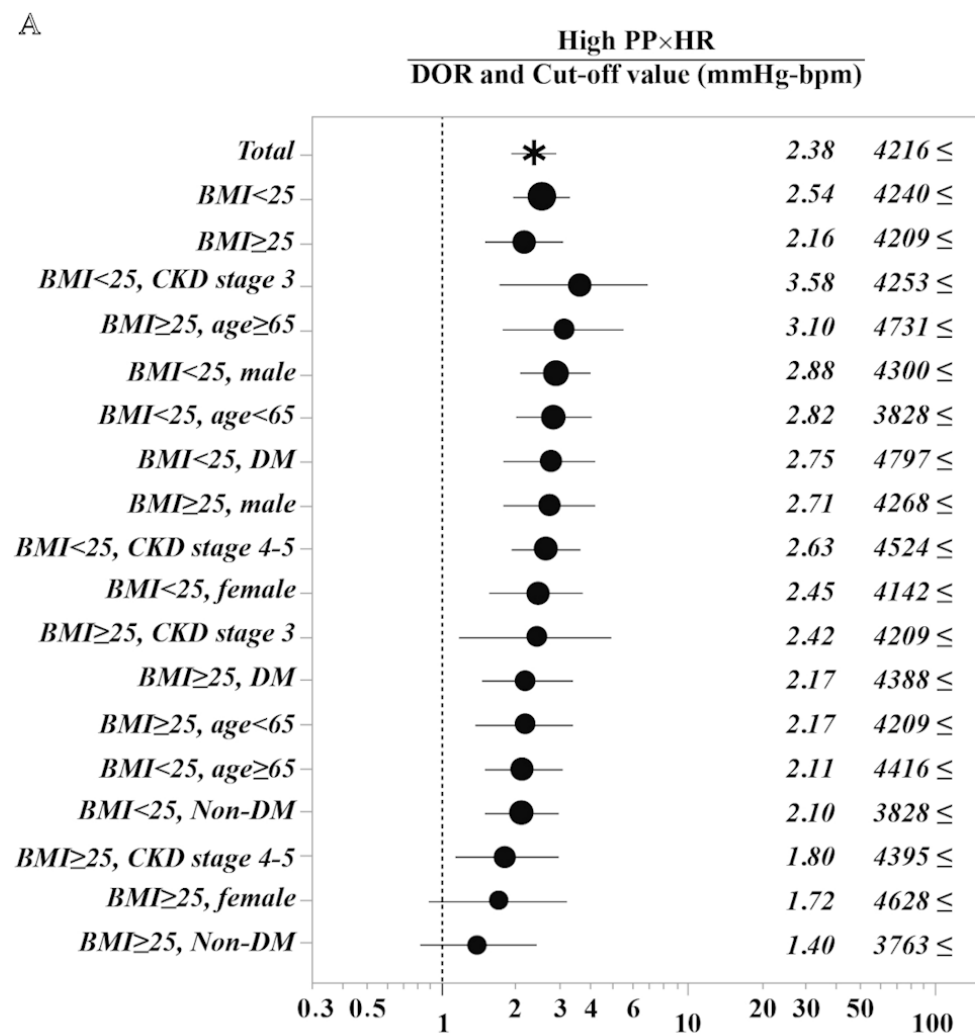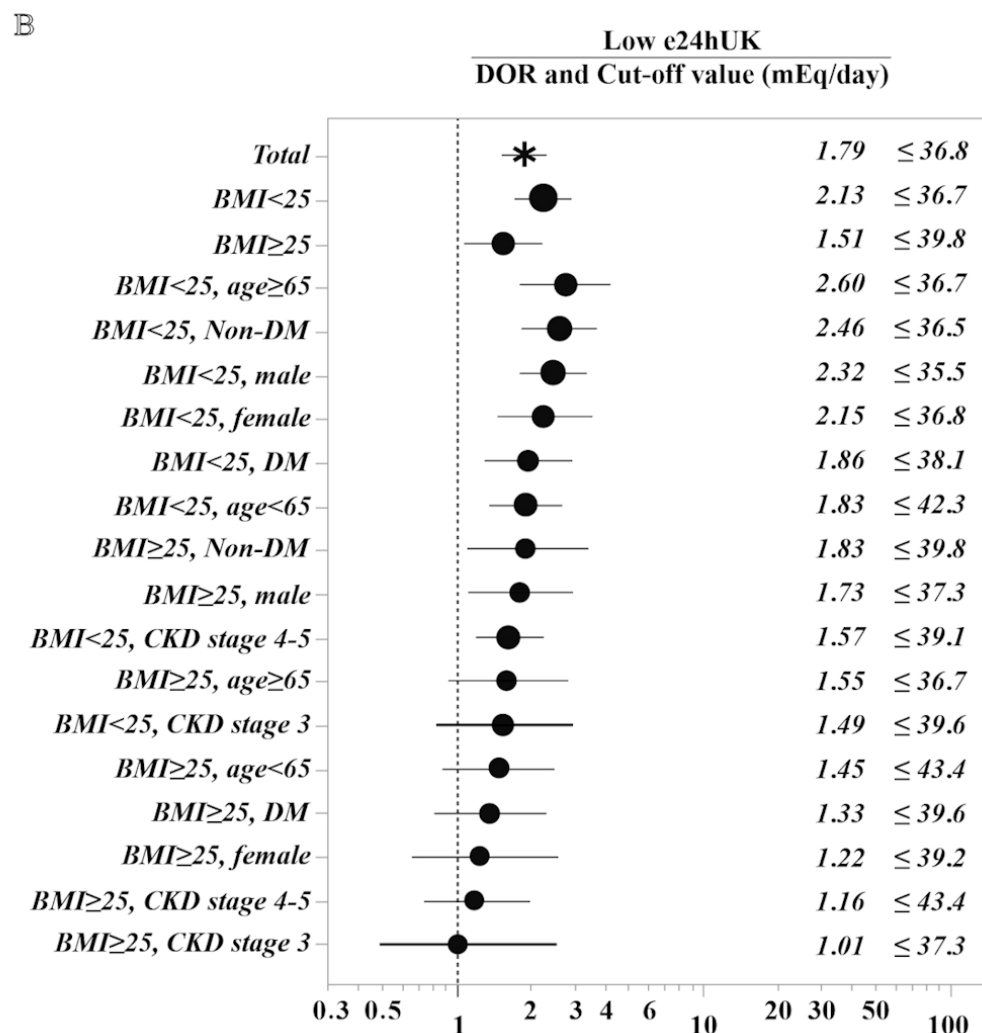

# Appendix Fig. 9B: Diagnostic odds ratios and UACR and serum albumin cut-off values according to subcohort

A summary of [Appendix Table 8](#) is depicted. Diagnostic odds ratios (DORs) and cut-off values according to subcohort for a decline in eGFR by  $\geq 50\%$  from baseline or end-stage renal disease during the follow-up examination period are shown for UACR (A) and serum albumin (B). For all cohorts, cut-off values were determined by ROC analyses. The asterisk reflects the DOR for the total cohort. For each subcohort, the DOR is represented by a circle, and the horizontal line crossing the circle represents the 95% confidence interval. Circle size is proportional to the number in each subcohort. BMI = body mass index; CKD = chronic kidney disease; DM = diabetes mellitus; UACR = urine albumin-to-creatinine ratio; ROC = receiver operating characteristics

A

## High UACR DOR and Cut-off value (mg/g Cre)

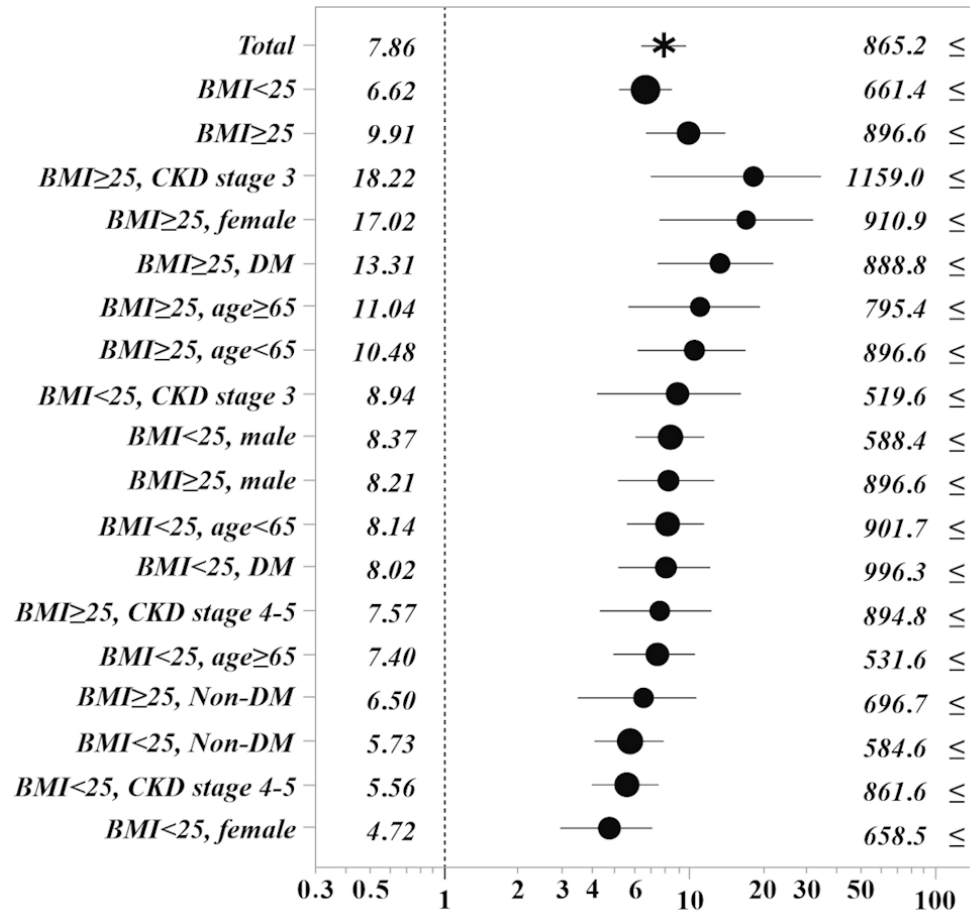

B

## Low Albumin DOR and Cut-off value (g/dL)

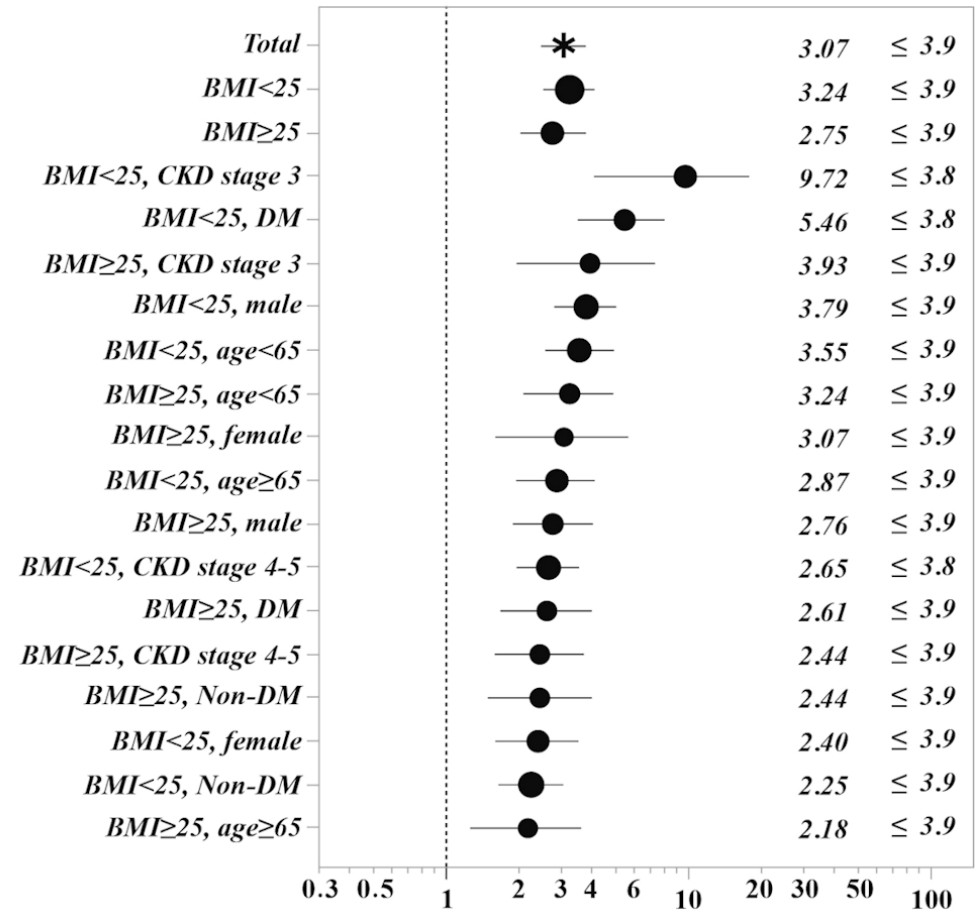

# Appendix Fig. 9C: Diagnostic odds ratios and hemoglobin and serum phosphorous cut-off values according to subcohort

A summary of [Appendix Table 8](#) is depicted. Diagnostic odds ratios (DORs) and cut-off values according to subcohort for a decline in eGFR by  $\geq 50\%$  from baseline or end-stage renal disease during the follow-up examination period are shown for hemoglobin (A) and serum phosphorous (B). For all cohorts, cut-off values were determined by ROC analyses. The asterisk reflects the DOR for the total cohort. For each subcohort, the DOR is represented by a circle, and the horizontal line crossing the circle represents the 95% confidence interval. Circle size is proportional to the number in each subcohort. BMI = body mass index; CKD = chronic kidney disease; DM = diabetes mellitus; ROC = receiver operating characteristics

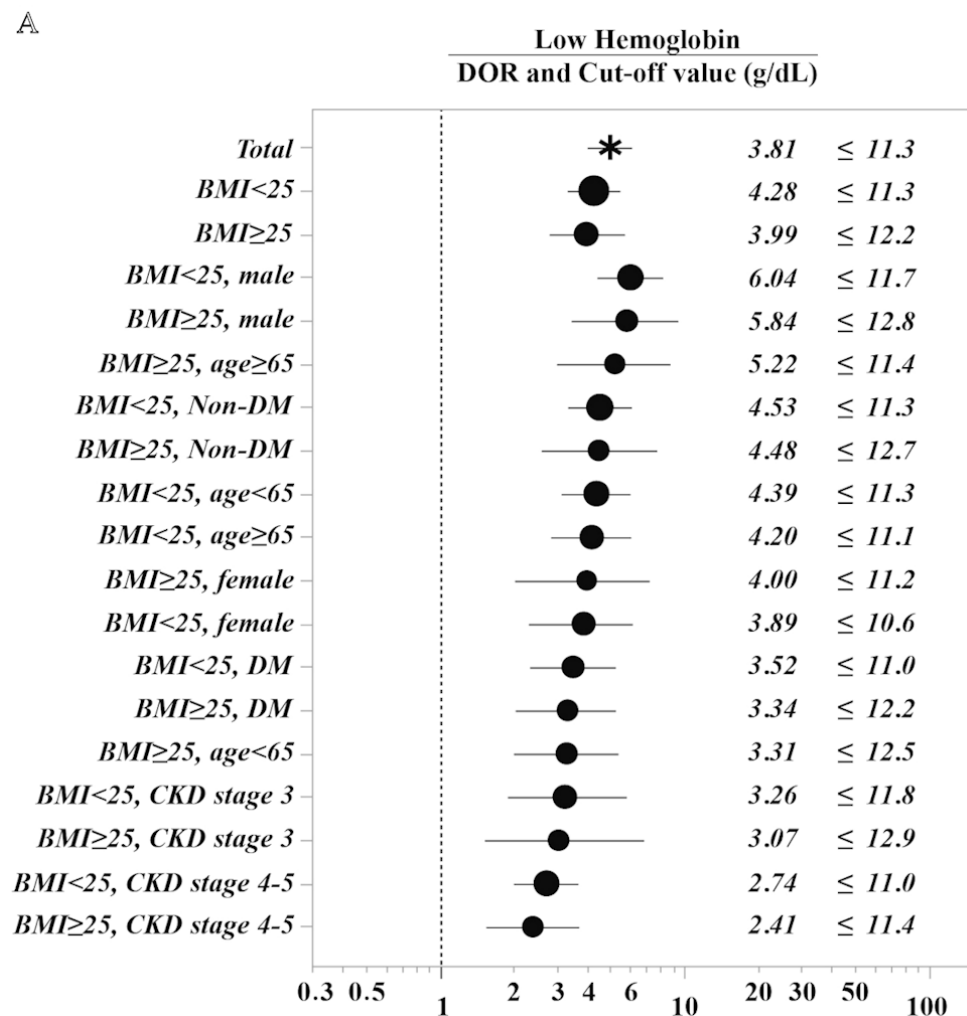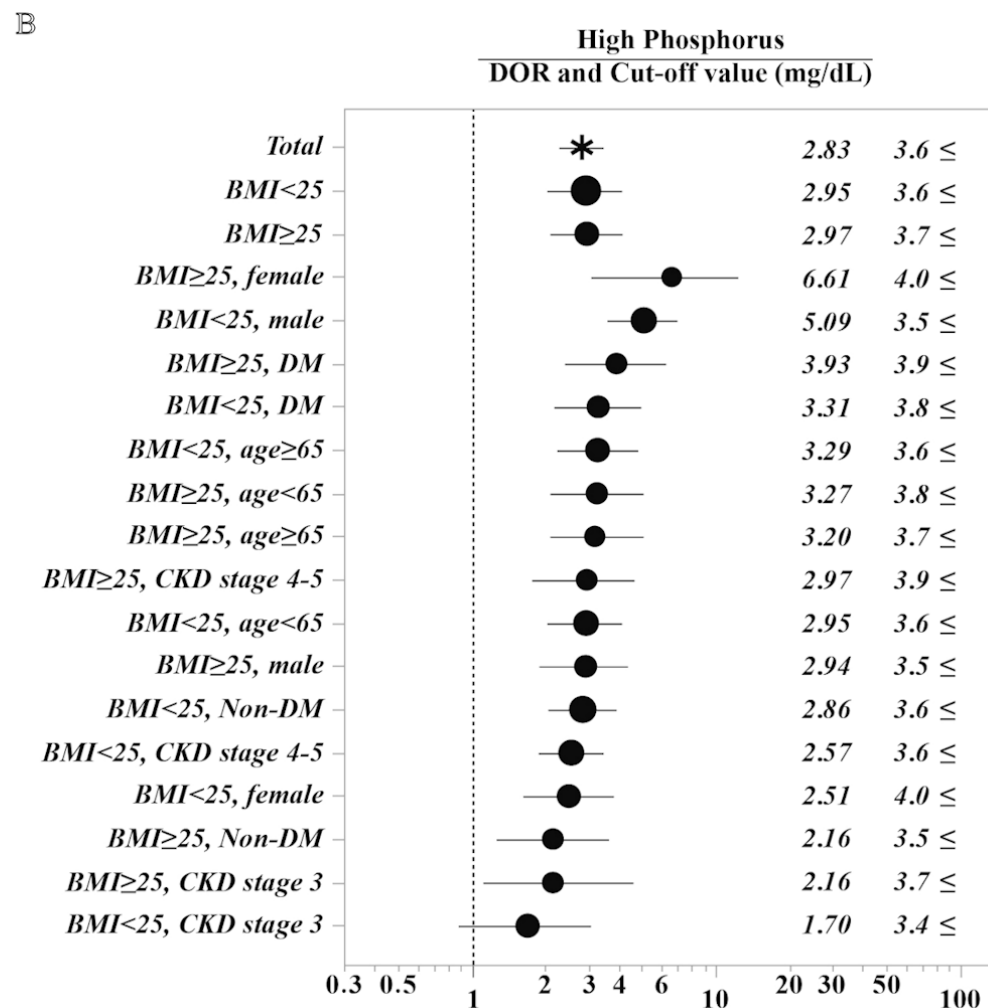

# Appendix Fig. 9D: Diagnostic odds ratios and the iPTH cut-off value according to subcohort

A summary of [Appendix Table 8](#) is depicted. Diagnostic odds ratios (DORs) and cut-off values according to subcohort for a decline in eGFR by  $\geq 50\%$  from baseline or end-stage renal disease during the follow-up examination period are shown for iPTH. For all cohorts, the cut-off value was determined by ROC analyses. The asterisk reflects the DOR for the total cohort. For each subcohort, the DOR is represented by a circle, and the horizontal line crossing the circle represents the 95% confidence interval. Circle size is proportional to the number in each subcohort. iPTH = intact parathyroid hormone; BMI = body mass index; CKD = chronic kidney disease; DM = diabetes mellitus; ROC = receiver operating characteristics

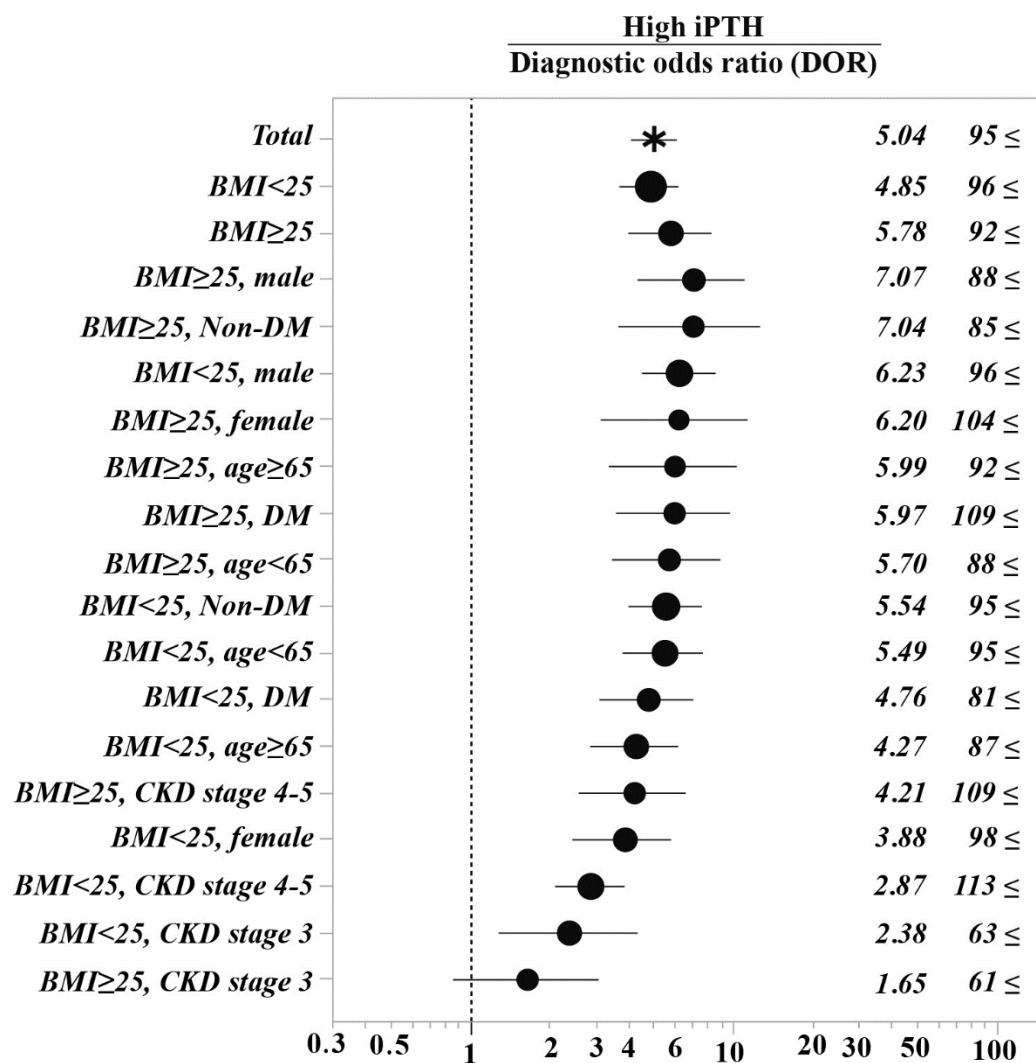



**Appendix Table 1. Baseline patient characteristics of subcohorts stratified by BMI**

| Variable                                                      | BMI < 18.5<br>(N = 197) | 18.5 ≤ BMI < 23<br>(N = 1090) | 23 ≤ BMI < 25<br>(N = 554) | BMI ≥ 25 < 27.5<br>(N = 446) | 27.5 ≤ BMI < 30<br>(N = 241) | 30 ≤ BMI<br>(N = 150) | p value |
|---------------------------------------------------------------|-------------------------|-------------------------------|----------------------------|------------------------------|------------------------------|-----------------------|---------|
| <b><u>Demographic and Clinical Characteristics</u></b>        |                         |                               |                            |                              |                              |                       |         |
| Age* (y)                                                      | 57.8 ± 14.1             | 60.7 ± 11.6                   | 61.6 ± 10.4                | 61.7 ± 10.1                  | 59.0 ± 11.9                  | 55.9 ± 12.7           | <0.0001 |
| Sex* Male                                                     | 70 (35.5)               | 659 (60.5)                    | 384 (69.3)                 | 321 (72.0)                   | 155 (64.3)                   | 96 (64.0)             | <0.0001 |
| BMI (kg/m <sup>2</sup> )                                      | 17.02 ± 1.43            | 21.08 ± 1.25                  | 23.95 ± 0.56               | 26.11 ± 0.70                 | 28.53 ± 0.72                 | 32.36 ± 1.97          | <0.0001 |
| SBP (mmHg)                                                    | 124.9 ± 20.8            | 129.7 ± 17.7                  | 132.9 ± 18.1               | 135.1 ± 19.0                 | 136.6 ± 18.4                 | 135.3 ± 18.8          | <0.0001 |
| DBP (mmHg)                                                    | 72.3 ± 11.8             | 74.9 ± 11.5                   | 77.1 ± 11.7                | 77.6 ± 12.4                  | 78.4 ± 10.7                  | 79.3 ± 13.3           | <0.0001 |
| MBP* (mmHg)                                                   | 89.8 ± 13.5             | 93.2 ± 12.3                   | 95.7 ± 12.5                | 96.8 ± 13.1                  | 97.8 ± 12.0                  | 98.0 ± 14.0           | <0.0001 |
| Pp (mmHg)                                                     | 52.7 ± 15.7             | 54.8 ± 13.7                   | 55.8 ± 14.0                | 57.5 ± 15.1                  | 58.2 ± 14.3                  | 56.0 ± 13.3           | <0.0001 |
| HR (beats/min)                                                | 78.7 ± 14.0             | 74.9 ± 12.6                   | 76.2 ± 12.6                | 76.0 ± 12.8                  | 75.8 ± 13.1                  | 76.7 ± 12.6           | 0.0175  |
| PP × HR* (mmHg-beats/min)                                     | 4164.4 ± 1503.2         | 4093.2 ± 1231.7               | 4232.9 ± 1256.8            | 4353.9 ± 1358.9              | 4447.6 ± 1320.9              | 4337.3 ± 1148.8       | 0.0007  |
| Pulse wave velocity (cm/s)                                    | 1655.3 ± 405.8          | 1675.0 ± 579.0                | 1688.7 ± 355.5             | 1718.1 ± 435.5               | 1673.8 ± 385.3               | 1458.0 ± 287.3        | 0.2681  |
| Ankle brachial index                                          | 1.103 ± 0.141           | 1.100 ± 0.143                 | 1.120 ± 0.115              | 1.131 ± 0.124                | 1.115 ± 0.131                | 1.096 ± 0.106         | 0.5142  |
| Primary cause of CKD                                          |                         |                               |                            |                              |                              |                       |         |
| Diabetic nephropathy                                          | 23 (11.7)               | 168 (15.4)                    | 117 (21.1)                 | 120 (26.9)                   | 86 (35.7)                    | 46 (30.7)             | <0.0001 |
| Chronic glomerulonephritis                                    | 95 (48.2)               | 523 (48.0)                    | 245 (44.2)                 | 168 (37.7)                   | 79 (32.8)                    | 49 (32.7)             |         |
| Nephrosclerosis                                               | 29 (14.7)               | 191 (17.5)                    | 98 (17.7)                  | 101 (22.6)                   | 48 (19.9)                    | 34 (22.7)             |         |
| Others                                                        | 50 (25.4)               | 208 (19.1)                    | 94 (17.0)                  | 57 (12.8)                    | 28 (11.6)                    | 21 (14.0)             |         |
| CKD stage                                                     |                         |                               |                            |                              |                              |                       |         |
| 3A                                                            | 8 (4.1)                 | 97 (8.9)                      | 64 (11.6)                  | 61 (13.7)                    | 34 (14.1)                    | 17 (11.3)             | 0.0018  |
| 3B                                                            | 60 (30.5)               | 384 (35.2)                    | 181 (32.7)                 | 157 (35.2)                   | 82 (34.0)                    | 62 (41.3)             |         |
| 4                                                             | 89 (45.2)               | 433 (39.7)                    | 226 (40.8)                 | 164 (36.8)                   | 79 (32.8)                    | 56 (37.3)             |         |
| 5                                                             | 40 (20.3)               | 176 (16.1)                    | 83 (15.0)                  | 64 (14.3)                    | 46 (19.1)                    | 15 (10.0)             |         |
| <b><u>Laboratory Findings (Whole blood, Serum, Urine)</u></b> |                         |                               |                            |                              |                              |                       |         |
| Hemoglobin* (g/dL)                                            | 11.13 ± 1.64            | 11.77 ± 1.71                  | 12.21 ± 1.82               | 12.43 ± 1.88                 | 12.54 ± 1.95                 | 13.01 ± 2.01          | <0.0001 |
| Albumin* (g/dL)                                               | 3.94 ± 0.44             | 3.95 ± 0.44                   | 4.00 ± 0.42                | 3.96 ± 0.41                  | 3.93 ± 0.42                  | 3.98 ± 0.42           | 0.2450  |

|                                    |     |                         |                         |                        |                         |                         |                         |                      |
|------------------------------------|-----|-------------------------|-------------------------|------------------------|-------------------------|-------------------------|-------------------------|----------------------|
| ALT* (IU/L)                        |     | 13.0 (10.0–19.0)        | 14.0 (11.0–20.0)        | 16.0 (11.0–22.0)       | 17.0 (13.0–23.0)        | 17.0 (13.0–23.0)        | 21.0 (14.0–32.0)        | <0.0001 <sup>a</sup> |
| Uric acid* (mg/dL)                 |     | 7.10 ± 1.58             | 7.07 ± 1.55             | 7.28 ± 1.52            | 7.18 ± 1.51             | 7.53 ± 1.64             | 7.69 ± 1.50             | <0.0001              |
| Creatinine (mg/dL)                 |     | 2.20 ± 0.98             | 2.15 ± 1.06             | 2.17 ± 1.07            | 2.13 ± 1.08             | 2.24 ± 1.18             | 2.03 ± 0.90             | 0.5007               |
| eGFR* (ml/min/1.73m <sup>2</sup> ) |     | 25.82 ± 10.88           | 28.55 ± 12.09           | 28.88 ± 12.16          | 29.99 ± 12.86           | 29.02 ± 13.21           | 30.65 ± 12.09           | 0.0013               |
| Potassium* (mEq/L)                 |     | 4.61 ± 0.71             | 4.67 ± 0.57             | 4.63 ± 0.55            | 4.62 ± 0.62             | 4.63 ± 0.56             | 4.57 ± 0.47             | 0.3110               |
| Phosphorus* (mg/dL)                |     | 3.77 ± 0.81             | 3.54 ± 0.66             | 3.47 ± 0.68            | 3.48 ± 0.69             | 3.64 ± 0.84             | 3.44 ± 0.60             | <0.0001              |
| iPTH* (pg/mL)                      |     | 98.5 (59.0–151.0)       | 79.0 (53.0–124.0)       | 76.0 (53.0–124.0)      | 76.0 (52.0–123.0)       | 82.5 (55.0–130.0)       | 78.0 (55.0–113.0)       | 0.0598 <sup>a</sup>  |
| LDL cholesterol* (mg/dL)           |     | 100.8 ± 32.5            | 106.8 ± 33.4            | 111.5 ± 33.4           | 109.1 ± 32.5            | 110.4 ± 33.3            | 108.7 ± 32.5            | 0.0167               |
| HDL cholesterol* (mg/dL)           |     | 68.8 ± 23.4             | 59.2 ± 20.2             | 51.9 ± 15.0            | 47.9 ± 13.5             | 46.9 ± 13.9             | 46.0 ± 13.7             | <0.0001              |
| Triglycerides* (mg/dL)             |     | 122.2 ± 66.4            | 141.4 ± 90.2            | 170.0 ± 100.0          | 192.1 ± 132.3           | 204.3 ± 119.5           | 223.7 ± 150.7           | <0.0001 <sup>a</sup> |
| Glucose* (mg/dL)                   |     | 112.7 ± 46.5            | 115.3 ± 41.1            | 119.9 ± 40.3           | 124.3 ± 48.5            | 128.6 ± 42.9            | 138.6 ± 57.8            | <0.0001              |
| Hemoglobin A1c (NGSP) (%)          |     | 5.59 ± 0.75             | 5.78 ± 0.79             | 5.95 ± 0.92            | 6.10 ± 0.94             | 6.25 ± 1.09             | 6.45 ± 1.21             | <0.0001              |
| UACR* (mg/g Cre)                   |     | 515.80 (149.50–1137.30) | 409.85 (105.70–1218.10) | 529.80 (95.10–1295.90) | 493.40 (113.35–1545.45) | 889.40 (259.90–2132.50) | 596.75 (132.70–1556.50) | <0.0001 <sup>a</sup> |
| e24hUK* (mEq/day)                  |     | 34.35 ± 7.77            | 37.26 ± 7.87            | 39.18 ± 7.98           | 40.36 ± 7.52            | 40.95 ± 7.55            | 43.68 ± 7.23            | <0.0001              |
| e24hUNa* (mEq/day)                 |     | 137.92 ± 42.40          | 144.31 ± 40.04          | 151.17 ± 41.10         | 157.89 ± 45.48          | 164.67 ± 50.35          | 179.68 ± 52.69          | <0.0001              |
| UCACR* (mg/g Cre)                  |     | 45.0 ± 56.6             | 35.9 ± 51.4             | 36.3 ± 55.0            | 33.7 ± 43.5             | 34.1 ± 51.0             | 40.7 ± 55.0             | 0.2013               |
| UPCR* (mg/g Cre)                   |     | 464.5 ± 223.9           | 408.3 ± 179.1           | 421.4 ± 152.4          | 423.2 ± 167.3           | 421.6 ± 157.2           | 455.1 ± 168.6           | 0.0007               |
| <b><u>Medications</u></b>          |     |                         |                         |                        |                         |                         |                         |                      |
| Antihypertensive medicine          | Yes | 145 (73.6)              | 949 (87.1)              | 507 (91.5)             | 417 (93.5)              | 231 (95.9)              | 145 (96.7)              | <0.0001              |
| RASI                               | Yes | 129 (65.5)              | 864 (79.3)              | 469 (84.7)             | 387 (86.8)              | 213 (88.4)              | 141 (94.0)              | <0.0001              |
| Ca blockade                        | Yes | 79 (40.1)               | 537 (49.3)              | 323 (58.3)             | 292 (65.5)              | 171 (71.0)              | 98 (65.3)               | <0.0001              |
| Statin                             | Yes | 48 (24.4)               | 394 (36.1)              | 235 (42.4)             | 211 (47.3)              | 119 (49.4)              | 77 (51.3)               | <0.0001              |
| Allopurinol                        | Yes | 70 (35.5)               | 454 (41.7)              | 277 (50.0)             | 209 (46.9)              | 123 (51.0)              | 84 (56.0)               | <0.0001              |
| Insulin                            | Yes | 17 (8.6)                | 109 (10.0)              | 69 (12.5)              | 66 (14.8)               | 43 (17.8)               | 27 (18.0)               | 0.0006               |
| ESAs                               | Yes | 48 (24.4)               | 165 (15.1)              | 63 (11.4)              | 45 (10.1)               | 24 (10.0)               | 11 (7.3)                | <0.0001              |
| Active vitamin D                   | Yes | 28 (14.2)               | 99 (9.1)                | 41 (7.4)               | 36 (8.1)                | 14 (5.8)                | 7 (4.7)                 | 0.0108               |
| Antiplatelet                       | Yes | 27 (13.7)               | 216 (19.8)              | 125 (22.6)             | 117 (26.2)              | 63 (26.1)               | 30 (20.0)               | 0.0025               |
| Diuretics*                         | Yes | 46 (23.4)               | 269 (24.7)              | 167 (30.1)             | 156 (35.0)              | 116 (48.1)              | 76 (50.7)               | <0.0001              |

### Comorbidities

|                      |     |            |            |            |            |            |            |         |
|----------------------|-----|------------|------------|------------|------------|------------|------------|---------|
| Hypertension*        | Yes | 154 (78.2) | 983 (90.3) | 521 (94.2) | 422 (94.6) | 233 (96.7) | 147 (98.0) | <0.0001 |
| Hypercholesterolemia | Yes | 81 (54.7)  | 535 (61.9) | 314 (66.2) | 278 (70.2) | 154 (72.6) | 94 (69.1)  | 0.0005  |
| Hypertriglyceridemia | Yes | 68 (43.6)  | 549 (58.6) | 353 (70.6) | 330 (78.4) | 186 (83.0) | 118 (84.3) | <0.0001 |
| Hyperuricemia        | Yes | 148 (76.3) | 807 (75.1) | 452 (82.0) | 353 (80.4) | 203 (84.9) | 130 (87.2) | 0.0001  |
| Hypoalbuminemia      | Yes | 55 (39.3)  | 471 (55.3) | 285 (62.0) | 273 (71.1) | 152 (73.4) | 99 (73.9)  | <0.0001 |
| Diabetes mellitus*   | Yes | 49 (24.9)  | 330 (30.3) | 217 (39.2) | 211 (47.3) | 131 (54.4) | 80 (53.3)  | <0.0001 |

Using the recommended BMI classified according to the WHO expert consultation (2004), the patients were divided into six groups: BMI < 18.5 kg/m<sup>2</sup>, 18.5 ≤ BMI < 25.0 kg/m<sup>2</sup>, 25.0 ≤ BMI < 27.5 kg/m<sup>2</sup> and 25.0 ≤ BMI < 27.5 kg/m<sup>2</sup>, 27.5 ≤ BMI < 30.0 kg/m<sup>2</sup>, BMI ≥ 30.0 kg/m<sup>2</sup>. Values are expressed as n (%), mean ± SD or median (inter quartile range). Imputed variables are marked with an asterisk (\*). Proportions are based on non-missing data. a: p values are calculated by using the Kruskal–Wallis test. Abbreviations: BMI, body mass index; N, number; SBP, systolic blood pressure; DBP, diastolic blood pressure; MBP, mean blood pressure; PP, pulse pressure; HR, heart rate; PP × HR, pulse pressure x heart rate; CVD, cardiovascular disease; CKD, chronic kidney disease; ALT, alanine aminotransferase; eGFR, estimated glomerular filtration rate; iPTH intact parathyroid hormone; LDL, low-density lipoprotein; HDL, high-density lipoprotein; UACR, urine albumin-to-creatinine ratio; e24hUK, estimated 24-hour urinary potassium excretion; e24hUNa, estimated 24-hour urinary sodium excretion; UCACR, urine calcium-to-creatinine ratio; UPCR, urine phosphorus-to-creatinine ratio; RASI, renin-angiotensin system inhibitor; ESA, erythropoiesis-stimulating agent

**Appendix Table 2A. Baseline patient characteristics of subcohorts stratified by sex and age**

| Variable                                                      | Female<br>(N = 993) | Male<br>(N = 1685) | p value | Age < 65<br>(N = 1504) | Age ≥ 65<br>(N = 1174) | p value |
|---------------------------------------------------------------|---------------------|--------------------|---------|------------------------|------------------------|---------|
| <b><i>Demographic and Clinical Characteristics</i></b>        |                     |                    |         |                        |                        |         |
| Age* (yrs)                                                    | 58.9 ± 12.1         | 61.3 ± 11.1        | <0.0001 | 52.8 ± 9.7             | 70.3 ± 3.2             | <0.0001 |
| Sex* Male                                                     | 0 (0.0)             | 1685 (100.0)       | <0.0001 | 905 (60.2)             | 780 (66.4)             | 0.0009  |
| BMI (kg/m²)                                                   | 22.86 ± 4.20        | 23.90 ± 3.51       | <0.0001 | 23.64 ± 4.05           | 23.35 ± 3.48           | 0.0466  |
| SBP (mmHg)                                                    | 130.4 ± 19.3        | 132.7 ± 18.2       | 0.0017  | 130.3 ± 18.5           | 133.8 ± 18.6           | <0.0001 |
| DBP (mmHg)                                                    | 75.3 ± 12.0         | 76.7 ± 11.8        | 0.0041  | 77.9 ± 11.9            | 74.0 ± 11.5            | <0.0001 |
| MBP* (mmHg)                                                   | 93.7 ± 13.1         | 95.4 ± 12.6        | 0.0009  | 95.3 ± 13.1            | 94.0 ± 12.5            | 0.0055  |
| Pp (mmHg)                                                     | 55.0 ± 14.6         | 56.0 ± 14.0        | 0.0798  | 52.4 ± 13.1            | 59.8 ± 14.6            | <0.0001 |
| HR (beats/min)                                                | 77.1 ± 12.4         | 75.1 ± 13.0        | 0.0002  | 76.5 ± 12.9            | 74.9 ± 12.7            | 0.0028  |
| PP × HR* (mmHg-beats/min)                                     | 4264.3 ± 1360.5     | 4188.3 ± 1243.2    | 0.1697  | 4003.4 ± 1211.1        | 4480.1 ± 1331.1        | <0.0001 |
| Pulse wave velocity (cm/s)                                    | 1590.5 ± 361.6      | 1710.0 ± 516.0     | 0.0171  | 1498.0 ± 289.2         | 1892.7 ± 563.4         | <0.0001 |
| Ankle brachial index                                          | 1.104 ± 0.106       | 1.114 ± 0.143      | 0.4187  | 1.128 ± 0.112          | 1.090 ± 0.150          | 0.0013  |
| Primary cause of CKD                                          |                     |                    |         |                        |                        |         |
| Diabetic nephropathy                                          | 162 (16.3)          | 398 (23.6)         | <0.0001 | 301 (20.0)             | 259 (22.1)             | <0.0001 |
| Chronic glomerulonephritis                                    | 534 (53.8)          | 625 (37.1)         |         | 754 (50.1)             | 405 (34.5)             |         |
| Nephrosclerosis                                               | 115 (11.6)          | 386 (22.9)         |         | 219 (14.6)             | 282 (24.0)             |         |
| Others                                                        | 182 (18.3)          | 276 (16.4)         |         | 230 (15.3)             | 228 (19.4)             |         |
| CKD stage                                                     |                     |                    |         |                        |                        |         |
| 3A                                                            | 105 (10.6)          | 176 (10.4)         | 0.0624  | 201 (13.4)             | 80 (6.8)               | <0.0001 |
| 3B                                                            | 317 (31.9)          | 609 (36.1)         |         | 524 (34.8)             | 402 (34.2)             |         |
| 4                                                             | 394 (39.7)          | 653 (38.8)         |         | 564 (37.5)             | 483 (41.1)             |         |
| 5                                                             | 177 (17.8)          | 247 (14.7)         |         | 215 (14.3)             | 209 (17.8)             |         |
| <b><i>Laboratory Findings (Whole blood, Serum, Urine)</i></b> |                     |                    |         |                        |                        |         |
| Hemoglobin* (g/dL)                                            | 11.39 ± 1.53        | 12.46 ± 1.91       | <0.0001 | 12.31 ± 1.86           | 11.74 ± 1.78           | <0.0001 |
| Albumin* (g/dL)                                               | 3.97 ± 0.40         | 3.96 ± 0.44        | 0.4077  | 3.99 ± 0.44            | 3.93 ± 0.41            | 0.0014  |

|                                    |                         |                         |                      |                         |                        |                      |
|------------------------------------|-------------------------|-------------------------|----------------------|-------------------------|------------------------|----------------------|
| ALT* (IU/L)                        | 13.0 (10.0–18.0)        | 17.0 (12.0–24.0)        | <0.0001 <sup>a</sup> | 16.0 (12.0–22.0)        | 15.0 (11.0–21.0)       | 0.0048 <sup>a</sup>  |
| Uric acid* (mg/dL)                 | 6.90 ± 1.50             | 7.40 ± 1.55             | <0.0001              | 7.26 ± 1.53             | 7.15 ± 1.58            | 0.0595               |
| Creatinine (mg/dL)                 | 1.87 ± 0.91             | 2.33 ± 1.11             | <0.0001              | 2.14 ± 1.09             | 2.17 ± 1.02            | 0.5056               |
| eGFR* (ml/min/1.73m <sup>2</sup> ) | 28.27 ± 12.58           | 29.14 ± 12.11           | 0.0790               | 30.04 ± 12.76           | 27.26 ± 11.48          | <0.0001              |
| Potassium* (mEq/L)                 | 4.60 ± 0.58             | 4.67 ± 0.58             | 0.0025               | 4.61 ± 0.58             | 4.67 ± 0.58            | 0.0111               |
| Phosphorus* (mg/dL)                | 3.81 ± 0.65             | 3.38 ± 0.68             | <0.0001              | 3.54 ± 0.74             | 3.54 ± 0.65            | 0.9086               |
| iPTH* (pg/mL)                      | 83.0 (56.0–133.0)       | 77.0 (52.0–122.0)       | 0.0018 <sup>a</sup>  | 79.0 (53.0–129.0)       | 78.5 (54.0–124.0)      | 0.7793 <sup>a</sup>  |
| LDL cholesterol* (mg/dL)           | 113.9 ± 34.0            | 105.1 ± 32.4            | <0.0001              | 110.8 ± 33.2            | 105.1 ± 33.0           | <0.0001              |
| HDL cholesterol* (mg/dL)           | 61.6 ± 19.2             | 50.2 ± 16.8             | <0.0001              | 56.0 ± 19.3             | 52.2 ± 17.3            | <0.0001              |
| Triglycerides* (mg/dL)             | 132.0 (95.0–186.0)      | 140.5 (97.0–210.0)      | 0.0027 <sup>a</sup>  | 139.0 (96.0–210.0)      | 134.0 (97.0–196.0)     | 0.0824 <sup>a</sup>  |
| Glucose* (mg/dL)                   | 112.8 ± 39.5            | 124.5 ± 46.5            | <0.0001              | 117.1 ± 43.9            | 124.0 ± 44.7           | 0.0002               |
| Hemoglobin A1c (NGSP) (%)          | 5.89 ± 0.97             | 5.95 ± 0.89             | 0.1322               | 5.87 ± 0.95             | 6.01 ± 0.87            | 0.0002               |
| UACR* (mg/g Cre)                   | 451.00 (113.50–1211.40) | 539.80 (123.20–1427.70) | 0.0724 <sup>a</sup>  | 568.70 (167.90–1409.30) | 430.20 (76.80–1240.50) | <0.0001 <sup>a</sup> |
| e24hUK* (mEq/day)                  | 37.73 ± 8.61            | 39.17 ± 7.64            | <0.0001              | 39.52 ± 7.93            | 37.53 ± 8.05           | <0.0001              |
| e24hUNa* (mEq/day)                 | 146.50 ± 43.54          | 154.06 ± 44.36          | <0.0001              | 154.82 ± 43.71          | 146.75 ± 44.42         | <0.0001              |
| UCACR* (mg/g Cre)                  | 45.1 ± 62.3             | 31.2 ± 43.1             | <0.0001              | 35.7 ± 51.3             | 37.2 ± 51.8            | 0.4572               |
| UPCR* (mg/g Cre)                   | 466.9 ± 198.7           | 394.1 ± 150.9           | <0.0001              | 420.0 ± 176.4           | 422.5 ± 170.5          | 0.7344               |

#### **Medications**

|                           |     |            |             |         |             |             |         |
|---------------------------|-----|------------|-------------|---------|-------------|-------------|---------|
| Antihypertensive medicine | Yes | 857 (86.3) | 1537 (91.2) | <0.0001 | 1339 (89.0) | 1055 (89.9) | 0.4865  |
| RASI                      | Yes | 785 (79.1) | 1418 (84.2) | 0.0008  | 1256 (83.5) | 947 (80.7)  | 0.0557  |
| Ca blockade               | Yes | 497 (50.1) | 1003 (59.5) | <0.0001 | 756 (50.3)  | 744 (63.4)  | <0.0001 |
| Statin                    | Yes | 473 (47.6) | 611 (36.3)  | <0.0001 | 608 (40.4)  | 476 (40.5)  | 0.9501  |
| Allopurinol               | Yes | 329 (33.1) | 888 (52.7)  | <0.0001 | 662 (44.0)  | 555 (47.3)  | 0.0929  |
| Insulin                   | Yes | 112 (11.3) | 219 (13.0)  | 0.1920  | 169 (11.2)  | 162 (13.8)  | 0.0456  |
| ESAs                      | Yes | 168 (16.9) | 188 (11.2)  | <0.0001 | 152 (10.1)  | 204 (17.4)  | <0.0001 |
| Active vitamin D          | Yes | 118 (11.9) | 107 (6.4)   | <0.0001 | 137 (9.1)   | 88 (7.5)    | 0.1354  |
| Antiplatelet              | Yes | 142 (14.3) | 436 (25.9)  | <0.0001 | 242 (16.1)  | 336 (28.6)  | <0.0001 |
| Diuretics*                | Yes | 284 (28.6) | 546 (32.4)  | 0.0398  | 422 (28.1)  | 408 (34.8)  | 0.0002  |

| <b><u>Comorbidities</u></b> |     |            |             |         |             |             |         |
|-----------------------------|-----|------------|-------------|---------|-------------|-------------|---------|
| Hypertension*               | Yes | 892 (89.9) | 1568 (93.1) | 0.0034  | 1372 (91.3) | 1088 (92.7) | 0.2102  |
| Hypercholesterolemia        | Yes | 633 (74.4) | 823 (59.7)  | <0.0001 | 835 (67.3)  | 621 (62.7)  | 0.0230  |
| Hypertriglyceridemia        | Yes | 615 (70.1) | 989 (65.9)  | 0.0334  | 897 (68.0)  | 707 (66.8)  | 0.5588  |
| Hyperuricemia               | Yes | 688 (70.4) | 1405 (84.1) | <0.0001 | 1178 (79.3) | 915 (78.7)  | 0.7144  |
| Hypoalphalipoproteinemia    | Yes | 502 (62.1) | 833 (60.9)  | 0.6055  | 731 (60.6)  | 604 (62.3)  | 0.4308  |
| Diabetes mellitus*          | Yes | 310 (31.2) | 708 (42.0)  | <0.0001 | 509 (33.8)  | 509 (43.4)  | <0.0001 |

**Appendix Table 2B. Baseline patient characteristics of subcohorts stratified by CKD stage and DM**

| Variable                                                      | CKD stage 3     | CKD stage 4–5   | p value | Non-DM          | DM              | p value |
|---------------------------------------------------------------|-----------------|-----------------|---------|-----------------|-----------------|---------|
|                                                               | (N = 1207)      | (N = 1471)      |         | (N = 1660)      | (N = 1018)      |         |
| <b><i>Demographic and Clinical Characteristics</i></b>        |                 |                 |         |                 |                 |         |
| Age* (yrs)                                                    | 58.9 ± 12.4     | 61.7 ± 10.6     | <0.0001 | 58.8 ± 12.5     | 63.1 ± 9.1      | <0.0001 |
| Sex*    Male                                                  | 785 (65.0)      | 900 (61.2)      | 0.0399  | 977 (58.9)      | 708 (69.5)      | <0.0001 |
| BMI (kg/m²)                                                   | 23.83 ± 3.83    | 23.25 ± 3.77    | <0.0001 | 22.89 ± 3.63    | 24.53 ± 3.88    | <0.0001 |
| SBP (mmHg)                                                    | 130.1 ± 17.7    | 133.3 ± 19.2    | <0.0001 | 129.9 ± 17.8    | 135.0 ± 19.5    | <0.0001 |
| DBP (mmHg)                                                    | 76.3 ± 11.4     | 76.1 ± 12.3     | 0.6674  | 77.5 ± 11.5     | 74.0 ± 12.2     | <0.0001 |
| MBP* (mmHg)                                                   | 94.2 ± 12.2     | 95.2 ± 13.3     | 0.0590  | 95.0 ± 12.6     | 94.4 ± 13.2     | 0.2384  |
| PP (mmHg)                                                     | 53.8 ± 13.6     | 57.2 ± 14.6     | <0.0001 | 52.4 ± 12.6     | 60.9 ± 15.2     | <0.0001 |
| HR (beats/min)                                                | 75.3 ± 12.6     | 76.2 ± 13.0     | 0.1114  | 75.5 ± 12.6     | 76.4 ± 13.2     | 0.0871  |
| PP × HR* (mmHg-beats/min)                                     | 4050.0 ± 1259.1 | 4352.2 ± 1295.5 | <0.0001 | 3960.5 ± 1149.6 | 4627.1 ± 1388.4 | <0.0001 |
| Pulse wave velocity (cm/s)                                    | 1599.4 ± 391.6  | 1745.1 ± 537.1  | 0.0021  | 1594.4 ± 505.5  | 1789.9 ± 384.7  | <0.0001 |
| Ankle brachial index                                          | 1.110 ± 0.114   | 1.111 ± 0.147   | 0.9549  | 1.129 ± 0.097   | 1.081 ± 0.170   | <0.0001 |
| Primary cause of CKD                                          |                 |                 |         |                 |                 |         |
| Diabetic nephropathy                                          | 218 (18.1)      | 342 (23.2)      | <0.0001 | 0 (0.0%)        | 560 (55.0)      | <0.0001 |
| Chronic glomerulonephritis                                    | 561 (46.5)      | 598 (40.7)      |         | 948 (57.1)      | 211 (20.7)      |         |
| Nephrosclerosis                                               | 201 (16.7)      | 300 (20.4)      |         | 348 (21.0)      | 153 (15.0)      |         |
| Others                                                        | 227 (18.8)      | 231 (15.7)      |         | 364 (21.9)      | 94 (9.2)        |         |
| CKD stage                                                     |                 |                 |         |                 |                 |         |
| 3A                                                            | 281 (23.3)      | 0 (0.0%)        | <0.0001 | 193 (11.6)      | 88 (8.6)        | 0.0446  |
| 3B                                                            | 926 (76.7)      | 0 (0.0%)        |         | 581 (35.0)      | 345 (33.9)      |         |
| 4                                                             | 0 (0.0%)        | 1047 (71.2)     |         | 637 (38.4)      | 410 (40.3)      |         |
| 5                                                             | 0 (0.0%)        | 424 (28.8)      |         | 249 (15.0)      | 175 (17.2)      |         |
| <b><i>Laboratory Findings (Whole blood, Serum, Urine)</i></b> |                 |                 |         |                 |                 |         |
| Hemoglobin* (g/dL)                                            | 12.92 ± 1.79    | 11.37 ± 1.59    | <0.0001 | 12.21 ± 1.83    | 11.82 ± 1.86    | <0.0001 |
| Albumin* (g/dL)                                               | 4.02 ± 0.43     | 3.92 ± 0.43     | <0.0001 | 4.02 ± 0.38     | 3.87 ± 0.48     | <0.0001 |

|                                    |                       |                         |                      |                        |                         |                      |
|------------------------------------|-----------------------|-------------------------|----------------------|------------------------|-------------------------|----------------------|
| ALT* (IU/L)                        | 17.0 (13.0–24.0)      | 14.0 (10.0–19.0)        | <0.0001 <sup>a</sup> | 15.0 (11.0–21.0)       | 16.0 (12.0–23.0)        | <0.0002 <sup>a</sup> |
| Uric acid* (mg/dL)                 | 6.94 ± 1.43           | 7.43 ± 1.62             | <0.0001              | 7.11 ± 1.50            | 7.38 ± 1.62             | <0.0001              |
| Creatinine (mg/dL)                 | 1.37 ± 0.27           | 2.80 ± 1.03             | <0.0001              | 2.11 ± 1.05            | 2.23 ± 1.08             | 0.0052               |
| eGFR* (ml/min/1.73m <sup>2</sup> ) | 40.23 ± 7.20          | 19.45 ± 6.14            | <0.0001              | 29.36 ± 12.42          | 27.93 ± 12.02           | 0.0033               |
| Potassium* (mEq/L)                 | 4.46 ± 0.48           | 4.78 ± 0.62             | <0.0001              | 4.63 ± 0.57            | 4.66 ± 0.59             | 0.2477               |
| Phosphorus* (mg/dL)                | 3.30 ± 0.60           | 3.72 ± 0.72             | <0.0001              | 3.47 ± 0.68            | 3.64 ± 0.72             | <0.0001              |
| iPTH* (pg/mL)                      | 58.0 (43.0–78.0)      | 111.0 (74.0–169.0)      | <0.0001 <sup>a</sup> | 78.0 (53.0–122.0)      | 81.0 (55.0–130.5)       | 0.1275 <sup>a</sup>  |
| LDL cholesterol* (mg/dL)           | 111.3 ± 33.5          | 105.7 ± 32.8            | <0.0001              | 109.6 ± 33.7           | 106.4 ± 32.4            | 0.0268               |
| HDL cholesterol* (mg/dL)           | 56.1 ± 18.7           | 52.8 ± 18.3             | <0.0001              | 57.5 ± 19.3            | 49.8 ± 16.4             | <0.0001              |
| Triglycerides* (mg/dL)             | 136.0 (95.0–202.0)    | 139.0 (98.0–203.0)      | 0.5967 <sup>a</sup>  | 132.0 (94.0–193.0)     | 147.0 (100.0–214.0)     | 0.0001 <sup>a</sup>  |
| Glucose* (mg/dL)                   | 120.2 ± 46.6          | 120.2 ± 42.5            | 0.9847               | 104.7 ± 22.3           | 142.1 ± 56.8            | <0.0001              |
| Hemoglobin A1c (NGSP) (%)          | 5.98 ± 0.98           | 5.89 ± 0.87             | 0.0176               | 5.47 ± 0.36            | 6.67 ± 1.05             | <0.0001              |
| UACR* (mg/g Cre)                   | 259.35 (56.95–846.85) | 764.60 (244.30–1566.90) | <0.0001 <sup>a</sup> | 401.60 (101.85–991.95) | 776.30 (151.40–2096.90) | <0.0001 <sup>a</sup> |
| e24hUK* (mEq/day)                  | 41.27 ± 7.92          | 36.52 ± 7.50            | <0.0001              | 38.11 ± 7.95           | 39.49 ± 8.14            | <0.0001              |
| e24hUNa* (mEq/day)                 | 155.31 ± 46.10        | 147.98 ± 42.34          | <0.0001              | 147.52 ± 41.25         | 157.31 ± 48.01          | <0.0001              |
| UCACR* (mg/g Cre)                  | 47.0 ± 58.6           | 27.8 ± 43.1             | <0.0001              | 34.7 ± 48.0            | 39.1 ± 56.7             | 0.0391               |
| UPCR* (mg/g Cre)                   | 406.7 ± 184.3         | 432.8 ± 164.0           | <0.0001              | 407.2 ± 169.8          | 443.6 ± 177.8           | <0.0001              |

### **Medications**

|                           |     |             |             |         |             |            |         |
|---------------------------|-----|-------------|-------------|---------|-------------|------------|---------|
| Antihypertensive medicine | Yes | 1034 (85.7) | 1360 (92.5) | <0.0001 | 1445 (87.0) | 949 (93.2) | <0.0001 |
| RASI                      | Yes | 967 (80.1)  | 1236 (84.0) | 0.0084  | 1319 (79.5) | 884 (86.8) | <0.0001 |
| Ca blockade               | Yes | 542 (44.9)  | 958 (65.1)  | <0.0001 | 842 (50.7)  | 658 (64.6) | <0.0001 |
| Statin                    | Yes | 498 (41.3)  | 586 (39.8)  | 0.4556  | 583 (35.1)  | 501 (49.2) | <0.0001 |
| Allopurinol               | Yes | 447 (37.0)  | 770 (52.3)  | <0.0001 | 800 (48.2)  | 417 (41.0) | <0.0001 |
| Insulin                   | Yes | 120 (9.9)   | 211 (14.3)  | 0.0006  | 0 (0.0)     | 331 (32.5) | <0.0001 |
| ESAs                      | Yes | 31 (2.6)    | 325 (22.1)  | <0.0001 | 179 (10.8)  | 177 (17.4) | <0.0001 |
| Active vitamin D          | Yes | 89 (7.4)    | 136 (9.2)   | 0.0823  | 147 (8.9)   | 78 (7.7)   | 0.2799  |
| Antiplatelet              | Yes | 234 (19.4)  | 344 (23.4)  | 0.0123  | 236 (14.2)  | 342 (33.6) | <0.0001 |
| Diuretics*                | Yes | 306 (25.4)  | 524 (35.6)  | <0.0001 | 340 (20.5)  | 490 (48.1) | <0.0001 |



### Comorbidities

|                      |     |             |             |         |             |              |         |
|----------------------|-----|-------------|-------------|---------|-------------|--------------|---------|
| Hypertension*        | Yes | 1073 (89.0) | 1387 (94.3) | <0.0001 | 1491 (89.9) | 969 (95.2)   | <0.0001 |
| Hypercholesterolemia | Yes | 682 (66.7)  | 774 (64.1)  | 0.2092  | 832 (62.6)  | 624 (69.3)   | 0.0012  |
| Hypertriglyceridemia | Yes | 731 (67.3)  | 873 (67.6)  | 0.8934  | 904 (63.7)  | 700 (73.1)   | <0.0001 |
| Hyperuricemia        | Yes | 839 (70.7)  | 1254 (85.9) | <0.0001 | 1301 (79.3) | 792 (78.6)   | 0.6764  |
| Hypoalbuminemia      | Yes | 593 (59.8)  | 742 (62.7)  | 0.1678  | 699 (54.9)  | 636 (70.4)   | <0.0001 |
| Diabetes mellitus*   | Yes | 433 (35.9)  | 585 (39.8)  | 0.0388  | 0 (0.0)     | 1018 (100.0) | <0.0001 |

Values are expressed as n (%), mean  $\pm$  SD or median (inter quartile range). Imputed variables are marked with an asterisk (\*). Proportions are based on non-missing data. a: p values are calculated by using the Kruskal–Wallis test. Abbreviations: BMI, body mass index; N, number; SBP, systolic blood pressure; DBP, diastolic blood pressure; MBP, mean blood pressure; PP, pulse pressure; HR, heart rate; PP  $\times$  HR, pulse pressure x heart rate; CVD, cardiovascular disease; CKD, chronic kidney disease; ALT, alanine aminotransferase; eGFR, estimated glomerular filtration rate; iPTH intact parathyroid hormone; LDL, low-density lipoprotein; HDL, high-density lipoprotein; UACR, urine albumin-to-creatinine ratio; e24hUK, estimated 24-hour urinary potassium excretion; e24hUNa, estimated 24-hour urinary sodium excretion; UCACR, urine calcium-to-creatinine ratio; UPCR, urine phosphorus-to-creatinine ratio; RASI, renin-angiotensin system inhibitor; ESA, erythropoiesis-stimulating agent; DM, diabetes mellitus.

**Appendix Table 3A. Baseline patient characteristics of subcohorts cross-classified by sex and BMI**

| Variable                                                      | BMI < 25, Male<br>(N = 1113) | BMI < 25, Female<br>(N = 1113) | BMI ≥ 25, Male<br>(N = 572) | BMI ≥ 25, Female<br>(N = 265) |
|---------------------------------------------------------------|------------------------------|--------------------------------|-----------------------------|-------------------------------|
| <b><u>Demographic and Clinical Characteristics</u></b>        |                              |                                |                             |                               |
| Age* (yrs)                                                    | 62.1 ± 10.9                  | 58.5 ± 12.3                    | 59.9 ± 11.2                 | 59.9 ± 11.5                   |
| Sex* Male                                                     | 1113 (100.0)                 | 0 (0.0)                        | 572 (100.0)                 | 0 (0.0)                       |
| BMI (kg/m <sup>2</sup> )                                      | 21.92 ± 2.00                 | 20.87 ± 2.57                   | 27.75 ± 2.45                | 28.31 ± 2.72                  |
| SBP (mmHg)                                                    | 131.3 ± 17.8                 | 128.3 ± 18.9                   | 135.4 ± 18.6                | 136.0 ± 19.2                  |
| DBP (mmHg)                                                    | 75.7 ± 11.5                  | 74.6 ± 12.0                    | 78.6 ± 12.1                 | 77.2 ± 11.9                   |
| MBP* (mmHg)                                                   | 94.3 ± 12.3                  | 92.5 ± 13.0                    | 97.5 ± 12.9                 | 96.8 ± 13.1                   |
| PP (mmHg)                                                     | 55.6 ± 13.8                  | 53.6 ± 14.4                    | 56.8 ± 14.5                 | 58.8 ± 14.7                   |
| HR (beats/min)                                                | 74.8 ± 12.9                  | 77.1 ± 12.5                    | 75.6 ± 13.1                 | 77.1 ± 12.2                   |
| PP × HR* (mmHg-beats/min)                                     | 4136.1 ± 1219.6              | 4152.3 ± 1344.9                | 4288.8 ± 1282.8             | 4574.3 ± 1358.2               |
| Pulse wave velocity (cm/s)                                    | 1732.8 ± 580.1               | 1584.5 ± 337.1                 | 1676.4 ± 403.5              | 1605.4 ± 421.8                |
| Ankle brachial index                                          | 1.109 ± 0.152                | 1.100 ± 0.104                  | 1.123 ± 0.127               | 1.114 ± 0.112                 |
| Primary cause of CKD                                          |                              |                                |                             |                               |
| Diabetic nephropathy                                          | 225 (20.2)                   | 83 (11.4)                      | 173 (30.2)                  | 79 (29.8)                     |
| Chronic glomerulonephritis                                    | 446 (40.1)                   | 417 (57.3)                     | 179 (31.3)                  | 117 (44.2)                    |
| Nephrosclerosis                                               | 240 (21.6)                   | 78 (10.7)                      | 146 (25.5)                  | 37 (14.0)                     |
| Others                                                        | 202 (18.1)                   | 150 (20.6)                     | 74 (12.9)                   | 32 (12.1)                     |
| CKD stage                                                     |                              |                                |                             |                               |
| 3A                                                            | 106 (9.5)                    | 63 (8.7)                       | 70 (12.2)                   | 42 (15.8)                     |
| 3B                                                            | 390 (35.0)                   | 235 (32.3)                     | 219 (38.3)                  | 82 (30.9)                     |
| 4                                                             | 446 (40.1)                   | 302 (41.5)                     | 207 (36.2)                  | 92 (34.7)                     |
| 5                                                             | 171 (15.4)                   | 128 (17.6)                     | 76 (13.3)                   | 49 (18.5)                     |
| <b><u>Laboratory Findings (Whole blood, Serum, Urine)</u></b> |                              |                                |                             |                               |
| Hemoglobin* (g/dL)                                            | 12.19 ± 1.84                 | 11.28 ± 1.49                   | 12.98 ± 1.94                | 11.68 ± 1.60                  |

|                              |                         |                         |                         |                         |
|------------------------------|-------------------------|-------------------------|-------------------------|-------------------------|
| Albumin* (g/dL)              | 3.95 ± 0.45             | 3.99 ± 0.40             | 3.97 ± 0.42             | 3.92 ± 0.40             |
| ALT* (IU/L)                  | 16.0 (11.0–23.0)        | 13.0 (10.0–17.0)        | 18.0 (14.0–26.0)        | 15.0 (11.0–20.0)        |
| Uric acid* (mg/dL)           | 7.35 ± 1.53             | 6.82 ± 1.52             | 7.49 ± 1.60             | 7.11 ± 1.43             |
| Creatinine (mg/dL)           | 2.34 ± 1.10             | 1.88 ± 0.90             | 2.29 ± 1.12             | 1.82 ± 0.91             |
| <b>eGFR* (ml/min/1.73m²)</b> | <b>28.67 ± 11.83</b>    | <b>27.88 ± 12.28</b>    | <b>30.05 ± 12.59</b>    | <b>29.35 ± 13.35</b>    |
| Potassium* (mEq/L)           | 4.69 ± 0.57             | 4.59 ± 0.59             | 4.62 ± 0.59             | 4.62 ± 0.56             |
| Phosphorus* (mg/dL)          | 3.38 ± 0.65             | 3.81 ± 0.66             | 3.38 ± 0.73             | 3.81 ± 0.62             |
| iPTH* (pg/mL)                | 77.0 (52.0–123.0)       | 83.0 (55.0–133.0)       | 76.0 (51.5–120.0)       | 82.0 (58.0–142.0)       |
| LDL cholesterol* (mg/dL)     | 104.2 ± 32.6            | 113.5 ± 34.1            | 106.9 ± 31.9            | 114.8 ± 33.8            |
| HDL cholesterol* (mg/dL)     | 53.2 ± 18.0             | 65.3 ± 19.9             | 44.9 ± 12.8             | 52.6 ± 14.0             |
| Triglycerides* (mg/dL)       | 127.0 (92.0–189.0)      | 121.5 (88.0–169.0)      | 169.0 (116.0–252.0)     | 160.0 (115.0–230.0)     |
| Glucose* (mg/dL)             | 121.8 ± 44.2            | 108.0 ± 35.3            | 129.5 ± 50.1            | 124.9 ± 46.4            |
| Hemoglobin A1c (NGSP) (%)    | 5.85 ± 0.81             | 5.74 ± 0.86             | 6.15 ± 0.99             | 6.32 ± 1.13             |
| UACR* (mg/g Cre)             | 497.30 (105.40–1310.00) | 414.85 (107.45–1088.70) | 615.95 (157.05–1684.40) | 600.70 (143.50–1641.40) |
| e24hUK* (mEq/day)            | 38.00 ± 7.46            | 36.82 ± 8.72            | 41.49 ± 7.47            | 40.32 ± 7.73            |
| e24hUNa* (mEq/day)           | 148.33 ± 40.59          | 141.71 ± 40.76          | 165.40 ± 49.12          | 160.05 ± 48.16          |
| UCACR* (mg/g Cre)            | 30.8 ± 43.5             | 46.3 ± 63.9             | 32.0 ± 42.3             | 41.7 ± 57.8             |
| UPCR* (mg/g Cre)             | 388.9 ± 152.6           | 462.0 ± 202.1           | 404.4 ± 147.2           | 480.5 ± 188.3           |

### **Medications**

|                           |     |            |            |            |            |
|---------------------------|-----|------------|------------|------------|------------|
| Antihypertensive medicine | Yes | 998 (89.7) | 603 (82.8) | 539 (94.2) | 254 (95.8) |
| RASI                      | Yes | 913 (82.0) | 549 (75.4) | 505 (88.3) | 236 (89.1) |
| Ca blockade               | Yes | 613 (55.1) | 326 (44.8) | 390 (68.2) | 171 (64.5) |
| Statin                    | Yes | 367 (33.0) | 310 (42.6) | 244 (42.7) | 163 (61.5) |
| Allopurinol               | Yes | 579 (52.0) | 222 (30.5) | 309 (54.0) | 107 (40.4) |
| Insulin                   | Yes | 135 (12.1) | 60 (8.2)   | 84 (14.7)  | 52 (19.6)  |
| ESAs                      | Yes | 146 (13.1) | 130 (17.9) | 42 (7.3)   | 38 (14.3)  |
| Active vitamin D          | Yes | 70 (6.3)   | 98 (13.5)  | 37 (6.5)   | 20 (7.5)   |

|                             |     |             |            |            |            |
|-----------------------------|-----|-------------|------------|------------|------------|
| Antiplatelet                | Yes | 267 (24.0)  | 101 (13.9) | 169 (29.5) | 41 (15.5)  |
| Diuretics*                  | Yes | 309 (27.8)  | 173 (23.8) | 237 (41.4) | 111 (41.9) |
| <b><u>Comorbidities</u></b> |     |             |            |            |            |
| Hypertension*               | Yes | 1024 (92.1) | 634 (87.2) | 544 (95.1) | 258 (97.4) |
| Hypercholesterolemia        | Yes | 493 (55.8)  | 437 (72.6) | 330 (66.7) | 196 (78.7) |
| Hypertriglyceridemia        | Yes | 575 (59.3)  | 395 (63.3) | 414 (77.8) | 220 (87.0) |
| Hyperuricemia               | Yes | 919 (83.1)  | 488 (68.3) | 486 (86.2) | 200 (76.0) |
| Hypoalbuminemia             | Yes | 485 (55.2)  | 326 (56.9) | 348 (71.2) | 176 (74.6) |
| Diabetes mellitus*          | Yes | 419 (37.6)  | 177 (24.3) | 289 (50.5) | 133 (50.2) |

**Appendix Table 3B. Baseline patient characteristics of subcohorts cross-classified by age and BMI**

| Variable                                                      | BMI < 25, Age < 65 | BMI < 25, Age ≥ 65 | BMI ≥ 25, Age < 65 | BMI ≥ 25, Age ≥ 65 |
|---------------------------------------------------------------|--------------------|--------------------|--------------------|--------------------|
|                                                               | (N = 1011)         | (N = 830)          | (N = 493)          | (N = 344)          |
| <b><u>Demographic and Clinical Characteristics</u></b>        |                    |                    |                    |                    |
| Age* (yrs)                                                    | 52.7 ± 9.9         | 70.3 ± 3.2         | 52.8 ± 9.3         | 70.1 ± 3.3         |
| Sex* Male                                                     | 570 (56.4)         | 543 (65.4)         | 335 (68.0)         | 237 (68.9)         |
| BMI (kg/m <sup>2</sup> )                                      | 21.41 ± 2.37       | 21.63 ± 2.21       | 28.23 ± 2.69       | 27.49 ± 2.26       |
| SBP (mmHg)                                                    | 128.4 ± 18.6       | 132.3 ± 17.7       | 134.1 ± 17.7       | 137.7 ± 20.1       |
| DBP (mmHg)                                                    | 76.8 ± 11.8        | 73.4 ± 11.3        | 80.1 ± 11.9        | 75.4 ± 11.8        |
| MBP* (mmHg)                                                   | 94.0 ± 13.1        | 93.0 ± 12.0        | 98.1 ± 12.7        | 96.2 ± 13.2        |
| PP (mmHg)                                                     | 51.5 ± 13.1        | 58.8 ± 14.2        | 54.0 ± 13.1        | 62.2 ± 15.3        |
| HR (beats/min)                                                | 76.4 ± 13.0        | 74.8 ± 12.6        | 76.8 ± 12.7        | 75.2 ± 13.0        |
| PP × HR* (mmHg-beats/min)                                     | 3942.0 ± 1216.5    | 4381.5 ± 1291.7    | 4130.6 ± 1191.4    | 4711.7 ± 1394.2    |
| Pulse wave velocity (cm/s)                                    | 1484.3 ± 278.3     | 1899.2 ± 610.1     | 1519.0 ± 305.5     | 1879.1 ± 454.3     |
| Ankle brachial index                                          | 1.124 ± 0.116      | 1.087 ± 0.153      | 1.137 ± 0.105      | 1.096 ± 0.143      |
| Primary cause of CKD                                          |                    |                    |                    |                    |
| Diabetic nephropathy                                          | 153 (15.1)         | 155 (18.7)         | 148 (30.0)         | 104 (30.2)         |
| Chronic glomerulonephritis                                    | 560 (55.4)         | 303 (36.5)         | 194 (39.4)         | 102 (29.7)         |
| Nephrosclerosis                                               | 124 (12.3)         | 194 (23.4)         | 95 (19.3)          | 88 (25.6)          |
| Others                                                        | 174 (17.2)         | 178 (21.4)         | 56 (11.4)          | 50 (14.5)          |
| CKD stage                                                     |                    |                    |                    |                    |
| 3A                                                            | 120 (11.9)         | 49 (5.9)           | 81 (16.4)          | 31 (9.0)           |
| 3B                                                            | 344 (34.0)         | 281 (33.9)         | 180 (36.5)         | 121 (35.2)         |
| 4                                                             | 403 (39.9)         | 345 (41.6)         | 161 (32.7)         | 138 (40.1)         |
| 5                                                             | 144 (14.2)         | 155 (18.7)         | 71 (14.4)          | 54 (15.7)          |
| <b><u>Laboratory Findings (Whole blood, Serum, Urine)</u></b> |                    |                    |                    |                    |
| Hemoglobin* (g/dL)                                            | 12.06 ± 1.75       | 11.55 ± 1.74       | 12.82 ± 1.98       | 12.20 ± 1.81       |

|                                    |                         |                        |                         |                        |
|------------------------------------|-------------------------|------------------------|-------------------------|------------------------|
| Albumin* (g/dL)                    | 4.00 ± 0.44             | 3.92 ± 0.43            | 3.96 ± 0.44             | 3.96 ± 0.38            |
| ALT* (IU/L)                        | 15.0 (11.0–21.0)        | 14.0 (11.0–20.0)       | 18.0 (14.0–27.0)        | 16.0 (12.0–22.0)       |
| Uric acid* (mg/dL)                 | 7.17 ± 1.54             | 7.10 ± 1.55            | 7.44 ± 1.50             | 7.27 ± 1.64            |
| Creatinine (mg/dL)                 | 2.14 ± 1.08             | 2.19 ± 1.02            | 2.15 ± 1.12             | 2.13 ± 1.04            |
| eGFR* (ml/min/1.73m <sup>2</sup> ) | 29.56 ± 12.43           | 26.90 ± 11.32          | 31.02 ± 13.36           | 28.13 ± 11.84          |
| Potassium* (mEq/L)                 | 4.63 ± 0.58             | 4.67 ± 0.58            | 4.58 ± 0.56             | 4.67 ± 0.60            |
| Phosphorus* (mg/dL)                | 3.53 ± 0.71             | 3.56 ± 0.66            | 3.54 ± 0.79             | 3.48 ± 0.62            |
| iPTH* (pg/mL)                      | 80.5 (53.0–131.5)       | 78.0 (54.0–123.5)      | 76.0 (53.0–123.0)       | 80.0 (54.0–128.0)      |
| LDL cholesterol* (mg/dL)           | 110.4 ± 33.2            | 104.5 ± 33.5           | 111.6 ± 33.2            | 106.3 ± 31.8           |
| HDL cholesterol* (mg/dL)           | 60.3 ± 20.6             | 54.7 ± 17.9            | 47.7 ± 13.0             | 46.6 ± 14.5            |
| Triglycerides* (mg/dL)             | 124.5 (88.0–186.0)      | 124.0 (94.0–175.0)     | 170.0 (117.0–260.0)     | 160.5 (114.0–221.0)    |
| Glucose* (mg/dL)                   | 111.6 ± 38.9            | 122.2 ± 43.8           | 128.0 ± 50.7            | 127.9 ± 46.5           |
| Hemoglobin A1c (NGSP) (%)          | 5.71 ± 0.82             | 5.92 ± 0.83            | 6.20 ± 1.10             | 6.21 ± 0.95            |
| UACR* (mg/g Cre)                   | 503.10 (148.80–1246.10) | 390.80 (72.50–1156.40) | 730.70 (199.20–1897.30) | 516.80 (98.80–1415.50) |
| e24hUK* (mEq/day)                  | 38.34 ± 7.92            | 36.58 ± 8.00           | 41.95 ± 7.39            | 39.92 ± 7.68           |
| e24hUNa* (mEq/day)                 | 148.92 ± 39.34          | 141.89 ± 42.13         | 167.02 ± 49.44          | 158.95 ± 47.66         |
| UCACR* (mg/g Cre)                  | 36.2 ± 53.6             | 37.8 ± 52.4            | 34.5 ± 46.3             | 35.9 ± 50.1            |
| UPCR* (mg/g Cre)                   | 417.8 ± 179.8           | 418.0 ± 174.9          | 424.7 ± 169.4           | 433.7 ± 158.4          |

### **Medications**

|                           |     |            |            |            |            |
|---------------------------|-----|------------|------------|------------|------------|
| Antihypertensive medicine | Yes | 869 (86.0) | 732 (88.2) | 470 (95.3) | 323 (93.9) |
| RASI                      | Yes | 816 (80.7) | 646 (77.8) | 440 (89.2) | 301 (87.5) |
| Ca blockade               | Yes | 433 (42.8) | 506 (61.0) | 323 (65.5) | 238 (69.2) |
| Statin                    | Yes | 367 (36.3) | 310 (37.3) | 241 (48.9) | 166 (48.3) |
| Allopurinol               | Yes | 426 (42.1) | 375 (45.2) | 236 (47.9) | 180 (52.3) |
| Insulin                   | Yes | 94 (9.3)   | 101 (12.2) | 75 (15.2)  | 61 (17.7)  |
| ESAs                      | Yes | 121 (12.0) | 155 (18.7) | 31 (6.3)   | 49 (14.2)  |
| Active vitamin D          | Yes | 102 (10.1) | 66 (8.0)   | 35 (7.1)   | 22 (6.4)   |

|                             |     |            |            |            |            |
|-----------------------------|-----|------------|------------|------------|------------|
| Antiplatelet                | Yes | 145 (14.3) | 223 (26.9) | 97 (19.7)  | 113 (32.8) |
| Diuretics*                  | Yes | 226 (22.4) | 256 (30.8) | 196 (39.8) | 152 (44.2) |
| <b><u>Comorbidities</u></b> |     |            |            |            |            |
| Hypertension*               | Yes | 896 (88.8) | 762 (91.8) | 476 (96.6) | 326 (94.8) |
| Hypercholesterolemia        | Yes | 516 (63.9) | 414 (61.0) | 319 (73.7) | 207 (66.6) |
| Hypertriglyceridemia        | Yes | 524 (60.7) | 446 (61.1) | 373 (81.6) | 261 (79.6) |
| Hyperuricemia               | Yes | 776 (77.7) | 631 (76.9) | 402 (82.7) | 284 (83.3) |
| Hypoalbuminemia             | Yes | 436 (55.6) | 375 (56.2) | 295 (69.9) | 229 (75.6) |
| Diabetes mellitus*          | Yes | 275 (27.2) | 321 (38.7) | 234 (47.5) | 188 (54.7) |

**Appendix Table 3C. Baseline patient characteristics of subcohorts cross-classified by CKD stage and BMI**

| Variable                                                      | BMI < 25, stage 3 | BMI < 25, CKD stage 4–5 | BMI ≥ 25, stage 3 | BMI ≥ 25, CKD stage 4–5 |
|---------------------------------------------------------------|-------------------|-------------------------|-------------------|-------------------------|
|                                                               | (N = 794)         | (N = 1047)              | (N = 413)         | (N = 424)               |
| <b><u>Demographic and Clinical Characteristics</u></b>        |                   |                         |                   |                         |
| Age* (yrs)                                                    | 59.2 ± 12.5       | 61.7 ± 10.8             | 58.3 ± 12.1       | 61.4 ± 10.3             |
| Sex* Male                                                     | 496 (62.5)        | 617 (58.9)              | 289 (70.0)        | 283 (66.7)              |
| BMI (kg/m <sup>2</sup> )                                      | 21.66 ± 2.19      | 21.39 ± 2.38            | 28.00 ± 2.69      | 27.85 ± 2.40            |
| SBP (mmHg)                                                    | 128.4 ± 17.6      | 131.4 ± 18.8            | 133.1 ± 17.7      | 137.9 ± 19.5            |
| DBP (mmHg)                                                    | 75.2 ± 11.3       | 75.3 ± 12.0             | 78.3 ± 11.3       | 78.0 ± 12.8             |
| MBP* (mmHg)                                                   | 93.0 ± 12.1       | 94.0 ± 12.9             | 96.6 ± 12.1       | 98.0 ± 13.7             |
| PP (mmHg)                                                     | 53.2 ± 13.4       | 56.1 ± 14.4             | 54.8 ± 13.8       | 60.0 ± 14.8             |
| HR (beats/min)                                                | 75.0 ± 12.4       | 76.2 ± 13.1             | 76.1 ± 13.1       | 76.1 ± 12.6             |
| PP × HR* (mmHg-beats/min)                                     | 3980.4 ± 1235.5   | 4264.9 ± 1282.6         | 4183.1 ± 1294.4   | 4566.5 ± 1304.0         |
| Pulse wave velocity (cm/s)                                    | 1589.6 ± 376.3    | 1764.6 ± 599.1          | 1615.5 ± 417.4    | 1707.9 ± 394.1          |
| Ankle brachial index                                          | 1.114 ± 0.122     | 1.099 ± 0.147           | 1.105 ± 0.097     | 1.138 ± 0.146           |
| Primary cause of CKD                                          |                   |                         |                   |                         |
| Diabetic nephropathy                                          | 112 (14.1)        | 196 (18.7)              | 106 (25.7)        | 146 (34.4)              |
| Chronic glomerulonephritis                                    | 404 (50.9)        | 459 (43.8)              | 157 (38.0)        | 139 (32.8)              |
| Nephrosclerosis                                               | 107 (13.5)        | 211 (20.2)              | 94 (22.8)         | 89 (21.0)               |
| Others                                                        | 171 (21.5)        | 181 (17.3)              | 56 (13.6)         | 50 (11.8)               |
| CKD stage                                                     |                   |                         |                   |                         |
| 3A                                                            | 169 (21.3)        | 0 (0.0%)                | 112 (27.1)        | 0 (0.0%)                |
| 3B                                                            | 625 (78.7)        | 0 (0.0%)                | 301 (72.9)        | 0 (0.0%)                |
| 4                                                             | 0 (0.0%)          | 748 (71.4)              | 0 (0.0%)          | 299 (70.5)              |
| 5                                                             | 0 (0.0%)          | 299 (28.6)              | 0 (0.0%)          | 125 (29.5)              |
| <b><u>Laboratory Findings (Whole blood, Serum, Urine)</u></b> |                   |                         |                   |                         |
| Hemoglobin* (g/dL)                                            | 12.64 ± 1.72      | 11.23 ± 1.54            | 13.45 ± 1.82      | 11.72 ± 1.64            |



|                                    |                       |                         |                        |                         |
|------------------------------------|-----------------------|-------------------------|------------------------|-------------------------|
| Albumin* (g/dL)                    | 4.03 ± 0.45           | 3.92 ± 0.42             | 4.00 ± 0.39            | 3.91 ± 0.43             |
| ALT* (IU/L)                        | 16.0 (12.0–22.0)      | 13.0 (10.0–19.0)        | 20.0 (15.0–29.0)       | 16.0 (11.0–21.0)        |
| Uric acid* (mg/dL)                 | 6.85 ± 1.38           | 7.36 ± 1.63             | 7.13 ± 1.50            | 7.60 ± 1.58             |
| Creatinine (mg/dL)                 | 1.36 ± 0.27           | 2.77 ± 1.02             | 1.37 ± 0.28            | 2.89 ± 1.05             |
| eGFR* (ml/min/1.73m <sup>2</sup> ) | 39.94 ± 7.01          | 19.57 ± 6.13            | 40.80 ± 7.52           | 19.14 ± 6.17            |
| Potassium* (mEq/L)                 | 4.48 ± 0.47           | 4.78 ± 0.62             | 4.43 ± 0.48            | 4.79 ± 0.61             |
| Phosphorus* (mg/dL)                | 3.32 ± 0.57           | 3.71 ± 0.72             | 3.25 ± 0.64            | 3.75 ± 0.71             |
| iPTH* (pg/mL)                      | 58.0 (41.0–77.0)      | 109.0 (73.0–164.0)      | 60.0 (46.0–80.0)       | 115.5 (74.0–182.0)      |
| LDL cholesterol* (mg/dL)           | 111.2 ± 34.2          | 104.9 ± 32.6            | 111.5 ± 32.2           | 107.4 ± 33.0            |
| HDL cholesterol* (mg/dL)           | 60.3 ± 19.8           | 55.7 ± 19.2             | 48.1 ± 13.2            | 46.5 ± 14.1             |
| Triglycerides* (mg/dL)             | 125.0 (88.0–178.0)    | 123.5 (92.0–179.0)      | 166.0 (113.0–234.5)    | 167.0 (119.0–251.0)     |
| Glucose* (mg/dL)                   | 116.4 ± 43.7          | 116.5 ± 39.8            | 127.1 ± 50.7           | 128.9 ± 47.3            |
| Hemoglobin A1c (NGSP) (%)          | 5.82 ± 0.84           | 5.79 ± 0.82             | 6.27 ± 1.14            | 6.13 ± 0.93             |
| UACR* (mg/g Cre)                   | 234.95 (51.20–764.90) | 689.25 (226.70–1453.20) | 341.45 (61.65–1116.40) | 923.70 (317.30–2096.90) |
| e24hUK* (mEq/day)                  | 40.38 ± 7.98          | 35.44 ± 7.35            | 42.96 ± 7.54           | 39.30 ± 7.15            |
| e24hUNa* (mEq/day)                 | 150.12 ± 42.57        | 142.46 ± 39.11          | 165.25 ± 50.80         | 162.21 ± 46.86          |
| UCACR* (mg/g Cre)                  | 48.4 ± 58.0           | 28.5 ± 47.3             | 44.3 ± 59.7            | 25.9 ± 29.5             |
| UPCR* (mg/g Cre)                   | 404.2 ± 187.3         | 427.9 ± 169.4           | 411.4 ± 178.5          | 445.2 ± 148.7           |

### **Medications**

|                           |     |            |            |            |            |
|---------------------------|-----|------------|------------|------------|------------|
| Antihypertensive medicine | Yes | 652 (82.1) | 949 (90.6) | 382 (92.5) | 411 (96.9) |
| RASI                      | Yes | 604 (76.1) | 858 (81.9) | 363 (87.9) | 378 (89.2) |
| Ca blockade               | Yes | 315 (39.7) | 624 (59.6) | 227 (55.0) | 334 (78.8) |
| Statin                    | Yes | 303 (38.2) | 374 (35.7) | 195 (47.2) | 212 (50.0) |
| Allopurinol               | Yes | 267 (33.6) | 534 (51.0) | 180 (43.6) | 236 (55.7) |
| Insulin                   | Yes | 67 (8.4)   | 128 (12.2) | 53 (12.8)  | 83 (19.6)  |
| ESAs                      | Yes | 26 (3.3)   | 250 (23.9) | 5 (1.2)    | 75 (17.7)  |
| Active vitamin D          | Yes | 66 (8.3)   | 102 (9.7)  | 23 (5.6)   | 34 (8.0)   |

|                             |     |            |            |            |            |
|-----------------------------|-----|------------|------------|------------|------------|
| Antiplatelet                | Yes | 137 (17.3) | 231 (22.1) | 97 (23.5)  | 113 (26.7) |
| Diuretics*                  | Yes | 161 (20.3) | 321 (30.7) | 145 (35.1) | 203 (47.9) |
| <b><u>Comorbidities</u></b> |     |            |            |            |            |
| Hypertension*               | Yes | 685 (86.5) | 973 (92.9) | 388 (93.9) | 414 (97.6) |
| Hypercholesterolemia        | Yes | 424 (64.1) | 506 (61.3) | 258 (71.3) | 268 (70.2) |
| Hypertriglyceridemia        | Yes | 428 (60.8) | 542 (61.0) | 303 (79.3) | 331 (82.1) |
| Hyperuricemia               | Yes | 523 (66.9) | 884 (85.2) | 316 (78.0) | 370 (87.7) |
| Hypoalbuminoproteinemia     | Yes | 352 (54.9) | 459 (56.7) | 241 (68.7) | 283 (75.7) |
| Diabetes mellitus*          | Yes | 233 (29.3) | 363 (34.7) | 200 (48.4) | 222 (52.4) |

---

**Appendix Table 3D. Baseline patient characteristics of subcohorts cross-classified by DM status and BMI**

| Variable                                                      | BMI < 25, Non-DM<br>(N = 1245) | BMI < 25, DM<br>(N = 596) | BMI ≥ 25, Non-DM<br>(N = 415) | BMI ≥ 25, DM<br>(N = 422) |
|---------------------------------------------------------------|--------------------------------|---------------------------|-------------------------------|---------------------------|
| <b><u>Demographic and Clinical Characteristics</u></b>        |                                |                           |                               |                           |
| Age* (yrs)                                                    | 59.0 ± 12.5                    | 64.1 ± 8.7                | 58.1 ± 12.6                   | 61.7 ± 9.6                |
| Sex* Male                                                     | 694 (55.7)                     | 419 (70.3)                | 283 (68.2)                    | 289 (68.5)                |
| BMI (kg/m <sup>2</sup> )                                      | 21.28 ± 2.33                   | 21.97 ± 2.16              | 27.70 ± 2.35                  | 28.15 ± 2.72              |
| SBP (mmHg)                                                    | 128.6 ± 17.9                   | 133.3 ± 18.7              | 133.7 ± 16.8                  | 137.4 ± 20.4              |
| DBP (mmHg)                                                    | 76.7 ± 11.4                    | 72.4 ± 11.8               | 80.0 ± 11.4                   | 76.4 ± 12.5               |
| MBP* (mmHg)                                                   | 94.0 ± 12.6                    | 92.7 ± 12.6               | 97.9 ± 12.0                   | 96.7 ± 13.8               |
| PP (mmHg)                                                     | 51.9 ± 12.5                    | 60.9 ± 15.1               | 53.7 ± 12.7                   | 61.0 ± 15.3               |
| HR (beats/min)                                                | 75.4 ± 12.7                    | 76.3 ± 13.1               | 75.7 ± 12.3                   | 76.5 ± 13.4               |
| PP × HR* (mmHg-beats/min)                                     | 3916.6 ± 1158.9                | 4604.6 ± 1360.1           | 4090.9 ± 1112.8               | 4659.1 ± 1429.1           |
| Pulse wave velocity (cm/s)                                    | 1617.2 ± 552.2                 | 1799.6 ± 363.3            | 1541.3 ± 372.9                | 1778.8 ± 410.5            |
| Ankle brachial index                                          | 1.131 ± 0.088                  | 1.053 ± 0.193             | 1.126 ± 0.119                 | 1.116 ± 0.127             |
| Primary cause of CKD                                          |                                |                           |                               |                           |
| Diabetic nephropathy                                          | 0 (0.0%)                       | 308 (51.7)                | 0 (0.0%)                      | 252 (59.7)                |
| Chronic glomerulonephritis                                    | 733 (58.9)                     | 130 (21.8)                | 215 (51.8)                    | 81 (19.2)                 |
| Nephrosclerosis                                               | 229 (18.4)                     | 89 (14.9)                 | 119 (28.7)                    | 64 (15.2)                 |
| Others                                                        | 283 (22.7)                     | 69 (11.6)                 | 81 (19.5)                     | 25 (5.9)                  |
| CKD stage                                                     |                                |                           |                               |                           |
| 3A                                                            | 122 (9.8)                      | 47 (7.9)                  | 71 (17.1)                     | 41 (9.7)                  |
| 3B                                                            | 439 (35.3)                     | 186 (31.2)                | 142 (34.2)                    | 159 (37.7)                |
| 4                                                             | 479 (38.5)                     | 269 (45.1)                | 158 (38.1)                    | 141 (33.4)                |
| 5                                                             | 205 (16.5)                     | 94 (15.8)                 | 44 (10.6)                     | 81 (19.2)                 |
| <b><u>Laboratory Findings (Whole blood, Serum, Urine)</u></b> |                                |                           |                               |                           |
| Hemoglobin* (g/dL)                                            | 11.98 ± 1.72                   | 11.53 ± 1.81              | 12.91 ± 1.95                  | 12.23 ± 1.86              |

|                           |                       |                         |                         |                         |
|---------------------------|-----------------------|-------------------------|-------------------------|-------------------------|
| Albumin* (g/dL)           | 4.02 ± 0.39           | 3.86 ± 0.51             | 4.05 ± 0.35             | 3.87 ± 0.45             |
| ALT* (IU/L)               | 14.0 (10.0–20.0)      | 16.0 (11.0–22.0)        | 18.0 (14.0–26.0)        | 16.5 (12.0–24.0)        |
| Uric acid* (mg/dL)        | 7.06 ± 1.49           | 7.30 ± 1.64             | 7.25 ± 1.52             | 7.49 ± 1.59             |
| Creatinine (mg/dL)        | 2.13 ± 1.05           | 2.23 ± 1.05             | 2.05 ± 1.04             | 2.23 ± 1.12             |
| eGFR* (ml/min/1.73m²)     | 28.78 ± 12.24         | 27.47 ± 11.49           | 31.11 ± 12.81           | 28.57 ± 12.73           |
| Potassium* (mEq/L)        | 4.64 ± 0.58           | 4.67 ± 0.57             | 4.60 ± 0.55             | 4.63 ± 0.61             |
| Phosphorus* (mg/dL)       | 3.51 ± 0.69           | 3.63 ± 0.68             | 3.37 ± 0.63             | 3.66 ± 0.78             |
| iPTH* (pg/mL)             | 80.0 (54.0–126.0)     | 78.0 (53.0–130.0)       | 74.0 (52.0–111.5)       | 87.0 (56.0–131.0)       |
| LDL cholesterol* (mg/dL)  | 109.4 ± 34.2          | 104.6 ± 31.9            | 110.1 ± 32.4            | 108.8 ± 33.0            |
| HDL cholesterol* (mg/dL)  | 60.6 ± 19.9           | 52.9 ± 18.1             | 49.1 ± 14.6             | 45.6 ± 12.5             |
| Triglycerides* (mg/dL)    | 122.0 (90.0–173.0)    | 130.5 (90.5–196.0)      | 167.0 (114.0–241.0)     | 166.0 (118.0–246.0)     |
| Glucose* (mg/dL)          | 103.8 ± 22.5          | 139.2 ± 55.9            | 107.1 ± 21.8            | 146.1 ± 58.0            |
| Hemoglobin A1c (NGSP) (%) | 5.44 ± 0.36           | 6.56 ± 1.00             | 5.56 ± 0.35             | 6.84 ± 1.10             |
| UACR* (mg/g Cre)          | 382.50 (94.95–976.65) | 697.85 (139.30–1775.30) | 449.25 (128.70–1135.10) | 889.40 (206.00–2673.30) |
| e24hUK* (mEq/day)         | 37.21 ± 7.94          | 38.19 ± 8.10            | 40.84 ± 7.31            | 41.40 ± 7.82            |
| e24hUNa* (mEq/day)        | 143.09 ± 38.98        | 151.09 ± 43.78          | 160.98 ± 44.94          | 166.43 ± 52.35          |
| UCACR* (mg/g Cre)         | 35.0 ± 48.0           | 40.8 ± 62.0             | 33.5 ± 47.9             | 36.6 ± 47.9             |
| UPCR* (mg/g Cre)          | 406.8 ± 175.8         | 440.6 ± 178.9           | 408.5 ± 150.3           | 448.1 ± 176.3           |

### **Medications**

|                           |     |             |            |            |            |
|---------------------------|-----|-------------|------------|------------|------------|
| Antihypertensive medicine | Yes | 1058 (85.0) | 543 (91.1) | 387 (93.3) | 406 (96.2) |
| RASI                      | Yes | 952 (76.5)  | 510 (85.6) | 367 (88.4) | 374 (88.6) |
| Ca blockade               | Yes | 576 (46.3)  | 363 (60.9) | 266 (64.1) | 295 (69.9) |
| Statin                    | Yes | 407 (32.7)  | 270 (45.3) | 176 (42.4) | 231 (54.7) |
| Allopurinol               | Yes | 571 (45.9)  | 230 (38.6) | 229 (55.2) | 187 (44.3) |
| Insulin                   | Yes | 0 (0.0)     | 195 (32.7) | 0 (0.0)    | 136 (32.2) |
| ESAs                      | Yes | 157 (12.6)  | 119 (20.0) | 22 (5.3)   | 58 (13.7)  |
| Active vitamin D          | Yes | 117 (9.4)   | 51 (8.6)   | 30 (7.2)   | 27 (6.4)   |

|                             |     |             |             |            |             |
|-----------------------------|-----|-------------|-------------|------------|-------------|
| Antiplatelet                | Yes | 167 (13.4)  | 201 (33.7)  | 69 (16.6)  | 141 (33.4)  |
| Diuretics*                  | Yes | 221 (17.8)  | 261 (43.8)  | 119 (28.7) | 229 (54.3)  |
| <b><u>Comorbidities</u></b> |     |             |             |            |             |
| Hypertension*               | Yes | 1097 (88.3) | 561 (94.1)  | 394 (94.9) | 408 (96.7)  |
| Hypercholesterolemia        | Yes | 596 (61.4)  | 334 (64.9)  | 236 (65.9) | 290 (75.1)  |
| Hypertriglyceridemia        | Yes | 601 (57.7)  | 369 (67.0)  | 303 (80.2) | 331 (81.3)  |
| Hyperuricemia               | Yes | 953 (77.6)  | 454 (76.7)  | 348 (84.5) | 338 (81.4)  |
| Hypoalphalipoproteinemia    | Yes | 472 (50.9)  | 339 (64.7)  | 227 (65.6) | 297 (78.4)  |
| Diabetes mellitus*          | Yes | 0 (0.0)     | 596 (100.0) | 0 (0.0)    | 422 (100.0) |

Values are expressed as n (%), mean  $\pm$  SD or median (inter quartile range). Imputed variables are marked with an asterisk (\*). Proportions are based on non-missing data. a: p values are calculated by using the Kruskal–Wallis test. Abbreviations: BMI, body mass index; N, number; SBP, systolic blood pressure; DBP, diastolic blood pressure; MBP, mean blood pressure; PP, pulse pressure; HR, heart rate; PP  $\times$  HR, pulse pressure x heart rate; CVD, cardiovascular disease; CKD, chronic kidney disease; ALT, alanine aminotransferase; eGFR, estimated glomerular filtration rate; iPTH, intact parathyroid hormone; LDL, low-density lipoprotein; HDL, high-density lipoprotein; UACR, urine albumin-to-creatinine ratio; e24hUK, estimated 24-hour urinary potassium excretion; e24hUNa, estimated 24-hour urinary sodium excretion; UCACR, urine calcium-to-creatinine ratio; UPCR, urine phosphorus-to-creatinine ratio; RASI, renin-angiotensin system inhibitor; ESA, erythropoiesis-stimulating agent; DM, diabetes mellitus.

**Appendix Table 4. Baseline patient characteristics for the assessment of elderly non-obese patients with DM (Left: Subcohorts stratified by age in the cohort of “BMI < 25, DM”, Right: Subcohorts stratified by BMI in the cohort of “Age ≥ 65, DM”)**

| Variable                                                      | BMI < 25, Age ≥ 65, DM<br>(N = 321) | BMI < 25, Age ≥ 65, Non-DM<br>(N = 509) | p value | BMI < 25, Age < 65, DM<br>(N = 275) | p value | BMI ≥ 25, Age ≥ 65, DM<br>(N = 188) | p value |
|---------------------------------------------------------------|-------------------------------------|-----------------------------------------|---------|-------------------------------------|---------|-------------------------------------|---------|
| <b><u>Demographic and Clinical Characteristics</u></b>        |                                     |                                         |         |                                     |         |                                     |         |
| Age* (yrs)                                                    | 70.4 ± 3.2                          | 70.3 ± 3.3                              | 0.5361  | 56.8 ± 7.2                          | <0.0001 | 70.0 ± 3.3                          | 0.2134  |
| Sex* Male                                                     | 226 (70.4)                          | 317 (62.3)                              | 0.0165  | 193 (70.2)                          | 0.9526  | 130 (69.1)                          | 0.7655  |
| BMI (kg/m <sup>2</sup> )                                      | 21.91 ± 2.11                        | 21.45 ± 2.26                            | 0.0031  | 22.04 ± 2.22                        | 0.4889  | 27.56 ± 2.31                        | <0.0001 |
| SBP (mmHg)                                                    | 133.6 ± 17.9                        | 131.4 ± 17.5                            | 0.0739  | 132.9 ± 19.6                        | 0.6081  | 138.3 ± 20.7                        | 0.0076  |
| DBP (mmHg)                                                    | 70.6 ± 11.3                         | 75.2 ± 11.0                             | <0.0001 | 74.5 ± 12.0                         | <0.0001 | 73.5 ± 11.9                         | 0.0065  |
| MBP* (mmHg)                                                   | 91.6 ± 11.9                         | 93.9 ± 12.0                             | 0.0067  | 94.0 ± 13.2                         | 0.0223  | 95.1 ± 13.5                         | 0.0026  |
| PP (mmHg)                                                     | 63.0 ± 15.0                         | 56.2 ± 12.9                             | <0.0001 | 58.3 ± 14.8                         | 0.0001  | 64.8 ± 15.6                         | 0.2039  |
| HR (beats/min)                                                | 74.6 ± 12.5                         | 75.0 ± 12.6                             | 0.6959  | 78.3 ± 13.5                         | 0.0012  | 74.3 ± 13.1                         | 0.7984  |
| PP × HR* (mmHg-beats/min)                                     | 4692.6 ± 1402.8                     | 4188.2 ± 1178.5                         | <0.0001 | 4504.4 ± 1305.4                     | 0.1140  | 4889.6 ± 1517.5                     | 0.1612  |
| Pulse wave velocity (cm/s)                                    | 1931.0 ± 381.8                      | 1879.8 ± 716.6                          | 0.6630  | 1643.4 ± 270.2                      | 0.0002  | 1962.5 ± 471.2                      | 0.7448  |
| Ankle brachial index                                          | 1.016 ± 0.199                       | 1.129 ± 0.095                           | <0.0001 | 1.100 ± 0.177                       | 0.0292  | 1.094 ± 0.128                       | 0.0359  |
| Primary cause of CKD                                          |                                     |                                         |         |                                     |         |                                     |         |
| Diabetic nephropathy                                          | 155 (48.3)                          | 0 (0.0%)                                | <0.0001 | 153 (55.6)                          | <0.0001 | 104 (55.3)                          | 0.0863  |
| Chronic glomerulonephritis                                    | 58 (18.1)                           | 245 (48.1)                              |         | 72 (26.2)                           |         | 35 (18.6)                           |         |
| Nephrosclerosis                                               | 65 (20.2)                           | 129 (25.3)                              |         | 24 (8.7)                            |         | 37 (19.7)                           |         |
| Others                                                        | 43 (13.4)                           | 135 (26.5)                              |         | 26 (9.5)                            |         | 12 (6.4)                            |         |
| CKD stage                                                     |                                     |                                         |         |                                     |         |                                     |         |
| 3A                                                            | 21 (6.5)                            | 28 (5.5)                                | 0.0318  | 26 (9.5)                            | 0.3523  | 15 (8.0)                            | 0.1011  |
| 3B                                                            | 105 (32.7)                          | 176 (34.6)                              |         | 81 (29.5)                           |         | 75 (39.9)                           |         |
| 4                                                             | 149 (46.4)                          | 196 (38.5)                              |         | 120 (43.6)                          |         | 66 (35.1)                           |         |
| 5                                                             | 46 (14.3)                           | 109 (21.4)                              |         | 48 (17.5)                           |         | 32 (17.0)                           |         |
| <b><u>Laboratory Findings (Whole blood, Serum, Urine)</u></b> |                                     |                                         |         |                                     |         |                                     |         |
| Hemoglobin* (g/dL)                                            | 11.45 ± 1.78                        | 11.62 ± 1.71                            | 0.1657  | 11.63 ± 1.84                        | 0.2224  | 12.12 ± 1.78                        | <0.0001 |

|                                    |                         |                       |                      |                         |                     |                         |                      |
|------------------------------------|-------------------------|-----------------------|----------------------|-------------------------|---------------------|-------------------------|----------------------|
| Albumin* (g/dL)                    | 3.89 ± 0.47             | 3.94 ± 0.40           | 0.1175               | 3.83 ± 0.54             | 0.1311              | 3.90 ± 0.41             | 0.8847               |
| ALT* (IU/L)                        | 16.0 (11.0–22.0)        | 14.0 (10.0–19.0)      | <0.0001 <sup>a</sup> | 15.0 (12.0–22.0)        | 0.8408 <sup>a</sup> | 16.0 (12.0–24.0)        | 0.5112 <sup>a</sup>  |
| Uric acid* (mg/dL)                 | 7.25 ± 1.64             | 7.00 ± 1.49           | 0.0268               | 7.37 ± 1.65             | 0.3722              | 7.48 ± 1.60             | 0.1236               |
| Creatinine (mg/dL)                 | 2.13 ± 0.94             | 2.22 ± 1.06           | 0.1768               | 2.34 ± 1.15             | 0.0115              | 2.16 ± 1.08             | 0.6743               |
| eGFR* (ml/min/1.73m <sup>2</sup> ) | 27.59 ± 11.18           | 26.46 ± 11.40         | 0.1622               | 27.34 ± 11.85           | 0.7897              | 28.05 ± 11.93           | 0.6594               |
| Potassium* (mEq/L)                 | 4.69 ± 0.59             | 4.67 ± 0.57           | 0.5879               | 4.66 ± 0.55             | 0.5135              | 4.69 ± 0.60             | 0.9267               |
| Phosphorus* (mg/dL)                | 3.59 ± 0.63             | 3.54 ± 0.67           | 0.2935               | 3.67 ± 0.73             | 0.2005              | 3.59 ± 0.65             | 0.9715               |
| iPTH* (pg/mL)                      | 76.0 (52.0–122.0)       | 81.0 (55.0–126.0)     | 0.1438 <sup>a</sup>  | 85.0 (56.0–144.0)       | 0.0280 <sup>a</sup> | 84.0 (57.0–129.0)       | 0.1106 <sup>a</sup>  |
| LDL cholesterol* (mg/dL)           | 102.2 ± 29.7            | 106.2 ± 35.9          | 0.1428               | 107.3 ± 34.0            | 0.0730              | 105.4 ± 31.7            | 0.2896               |
| HDL cholesterol* (mg/dL)           | 51.5 ± 17.5             | 57.1 ± 17.8           | 0.0002               | 54.4 ± 18.8             | 0.0802              | 45.6 ± 13.3             | 0.0005               |
| Triglycerides* (mg/dL)             | 128.5 (90.5–187.5)      | 122.0 (94.0–168.0)    | 0.5995 <sup>a</sup>  | 134.0 (90.5–199.5)      | 0.2686 <sup>a</sup> | 156.5 (116.0–213.0)     | <0.0001 <sup>a</sup> |
| Glucose* (mg/dL)                   | 143.4 ± 54.4            | 106.9 ± 24.6          | <0.0001              | 134.3 ± 57.2            | 0.0549              | 141.1 ± 54.1            | 0.6532               |
| Hemoglobin A1c (NGSP) (%)          | 6.54 ± 0.96             | 5.53 ± 0.36           | <0.0001              | 6.59 ± 1.05             | 0.6159              | 6.70 ± 1.01             | 0.0928               |
| UACR* (mg/g Cre)                   | 513.25 (105.15–1434.90) | 323.60 (60.70–969.60) | 0.0006 <sup>a</sup>  | 921.75 (216.00–2248.90) | 0.0002 <sup>a</sup> | 689.45 (109.35–1802.35) | 0.1713 <sup>a</sup>  |
| e24hUK* (mEq/day)                  | 37.52 ± 8.04            | 35.98 ± 7.93          | 0.0097               | 38.99 ± 8.10            | 0.0333              | 40.12 ± 7.43            | 0.0007               |
| e24hUNa* (mEq/day)                 | 146.32 ± 45.42          | 139.07 ± 39.68        | 0.0201               | 156.75 ± 41.13          | 0.0053              | 157.92 ± 48.05          | 0.0104               |
| UCACR* (mg/g Cre)                  | 40.2 ± 53.8             | 36.2 ± 51.5           | 0.3110               | 41.6 ± 70.5             | 0.7845              | 34.4 ± 42.3             | 0.2368               |
| UPCR* (mg/g Cre)                   | 433.5 ± 179.2           | 408.1 ± 171.6         | 0.0499               | 448.9 ± 178.7           | 0.3144              | 442.4 ± 166.3           | 0.6013               |

### **Medications**

|                           |     |            |            |         |            |        |            |        |
|---------------------------|-----|------------|------------|---------|------------|--------|------------|--------|
| Antihypertensive medicine | Yes | 293 (91.3) | 439 (86.2) | 0.0288  | 250 (90.9) | 0.8749 | 182 (96.8) | 0.0159 |
| RASI                      | Yes | 274 (85.4) | 372 (73.1) | <0.0001 | 236 (85.8) | 0.8734 | 166 (88.3) | 0.3498 |
| Ca blockade               | Yes | 214 (66.7) | 292 (57.4) | 0.0075  | 149 (54.2) | 0.0018 | 137 (72.9) | 0.1442 |
| Statin                    | Yes | 139 (43.3) | 171 (33.6) | 0.0049  | 131 (47.6) | 0.2893 | 100 (53.2) | 0.0310 |
| Allopurinol               | Yes | 136 (42.4) | 239 (47.0) | 0.1959  | 94 (34.2)  | 0.0407 | 84 (44.7)  | 0.6111 |
| Insulin                   | Yes | 101 (31.5) | 0 (0.0)    | <0.0001 | 94 (34.2)  | 0.4809 | 61 (32.4)  | 0.8183 |
| ESAs                      | Yes | 70 (21.8)  | 85 (16.7)  | 0.0659  | 49 (17.8)  | 0.2246 | 35 (18.6)  | 0.3907 |
| Active vitamin D          | Yes | 21 (6.5)   | 45 (8.8)   | 0.2332  | 30 (10.9)  | 0.0574 | 11 (5.9)   | 0.7566 |
| Antiplatelet              | Yes | 123 (38.3) | 100 (19.6) | <0.0001 | 78 (28.4)  | 0.0104 | 75 (39.9)  | 0.7249 |

|                             |     |             |            |         |             |        |             |        |
|-----------------------------|-----|-------------|------------|---------|-------------|--------|-------------|--------|
| Diuretics*                  | Yes | 140 (43.6)  | 116 (22.8) | <0.0001 | 121 (44.0)  | 0.9245 | 102 (54.3)  | 0.0203 |
| <b><u>Comorbidities</u></b> |     |             |            |         |             |        |             |        |
| Hypertension*               | Yes | 303 (94.4)  | 459 (90.2) | 0.0310  | 258 (93.8)  | 0.7662 | 182 (96.8)  | 0.2146 |
| Hypercholesterolemia        | Yes | 170 (61.4)  | 244 (60.7) | 0.8593  | 164 (68.9)  | 0.0741 | 124 (71.3)  | 0.0318 |
| Hypertriglyceridemia        | Yes | 194 (65.8)  | 252 (57.9) | 0.0332  | 175 (68.4)  | 0.5180 | 143 (79.9)  | 0.0010 |
| Hyperuricemia               | Yes | 246 (77.1)  | 385 (76.7) | 0.8887  | 208 (76.2)  | 0.7906 | 153 (82.3)  | 0.1711 |
| Hypoalbuminemia             | Yes | 176 (63.5)  | 199 (51.0) | 0.0013  | 163 (66.0)  | 0.5574 | 133 (79.2)  | 0.0005 |
| Diabetes mellitus*          | Yes | 321 (100.0) | 0 (0.0)    | <0.0001 | 275 (100.0) |        | 188 (100.0) |        |

Values are expressed as n (%), mean  $\pm$  SD or median (inter quartile range). Imputed variables are marked with an asterisk (\*). Proportions are based on non-missing data. a: p values are calculated by using the Kruskal–Wallis test comparing with “BMI < 25, Age  $\geq$  65, DM”. Abbreviations: BMI, body mass index; DM, diabetes mellitus; N, number; SBP, systolic blood pressure; DBP, diastolic blood pressure; MBP, mean blood pressure; PP, pulse pressure; HR, heart rate; PP  $\times$  HR, pulse pressure x heart rate; CVD, cardiovascular disease; CKD, chronic kidney disease; ALT, alanine aminotransferase; eGFR, estimated glomerular filtration rate; iPTH, intact parathyroid hormone; LDL, low-density lipoprotein; HDL, high-density lipoprotein; UACR, urine albumin-to-creatinine ratio; e24hUK, estimated 24-hour urinary potassium excretion; e24hUNa, estimated 24-hour urinary sodium excretion; UCACR, urine calcium-to-creatinine ratio; UPCR, urine phosphorus-to-creatinine ratio; RASI, renin-angiotensin system inhibitor; ESA, erythropoiesis-stimulating agent



**Appendix Table 5. Predictive characteristics of subcohorts for  $\geq 50\%$  eGFR decline or ESRD**

| Cohort                  | Positive      | Sensitivity |               | Specificity |               | Positive likelihood ratio |             | Negative likelihood ratio |             | Diagnostic odds ratio |              |
|-------------------------|---------------|-------------|---------------|-------------|---------------|---------------------------|-------------|---------------------------|-------------|-----------------------|--------------|
|                         |               | (%)         | 95%CI         | (%)         | 95%CI         | Value                     | 95%CI       | Value                     | 95%CI       | Value                 | 95%CI        |
| Overall                 | Age $\geq 65$ | 44.90       | (40.96–48.41) | 56.58       | (54.32–58.87) | 1.03                      | (0.93–1.14) | 0.97                      | (0.90–1.06) | 1.06                  | (0.88–1.27)  |
|                         | BMI $\geq 25$ | 36.25       | (32.70–39.73) | 70.91       | (68.66–73.08) | 1.25                      | (1.09–1.42) | 0.90                      | (0.84–0.96) | 1.39                  | (1.14–1.69)  |
|                         | DM            | 49.49       | (45.76–53.01) | 67.04       | (64.94–69.30) | 1.5                       | (1.36–1.67) | 0.75                      | (0.70–0.82) | 1.99                  | (1.66–2.40)  |
|                         | Male          | 71.18       | (67.71–74.79) | 40.56       | (38.29–42.82) | 1.2                       | (1.13–1.28) | 0.71                      | (0.62–0.82) | 1.69                  | (1.37–2.06)  |
|                         | CKD stage 4–5 | 84.40       | (81.52–87.33) | 57.53       | (55.10–59.78) | 1.99                      | (1.86–2.12) | 0.27                      | (0.23–0.33) | 7.33                  | (5.69–9.25)  |
| BMI < 25                | Age $\geq 65$ | 46.82       | (41.84–51.54) | 55.56       | (52.78–58.13) | 1.05                      | (0.93–1.19) | 0.96                      | (0.87–1.07) | 1.10                  | (0.87–1.37)  |
|                         | DM            | 41.70       | (37.19–46.12) | 71.32       | (68.74–73.81) | 1.45                      | (1.26–1.69) | 0.82                      | (0.75–0.90) | 1.78                  | (1.41–2.25)  |
|                         | Male          | 69.66       | (65.43–73.92) | 43.06       | (40.12–45.73) | 1.22                      | (1.12–1.33) | 0.70                      | (0.60–0.84) | 1.74                  | (1.35–2.19)  |
|                         | CKD stage 4–5 | 87.38       | (84.17–90.77) | 54.65       | (51.77–57.49) | 1.93                      | (1.79–2.07) | 0.23                      | (0.18–0.31) | 8.34                  | (5.90–11.19) |
| BMI < 25, female        | Age $\geq 65$ | 48.03       | (39.73–56.38) | 62.90       | (58.84–67.00) | 1.29                      | (1.05–1.63) | 0.83                      | (0.70–1.00) | 1.57                  | (1.06–2.34)  |
|                         | DM            | 31.87       | (23.89–39.50) | 77.76       | (74.32–81.38) | 1.43                      | (1.07–1.99) | 0.88                      | (0.78–1.00) | 1.64                  | (1.07–2.56)  |
|                         | CKD stage 4–5 | 91.13       | (86.27–96.59) | 49.51       | (45.43–53.63) | 1.8                       | (1.63–1.99) | 0.18                      | (0.11–0.40) | 10.07                 | (4.21–17.84) |
| BMI < 25, male          | Age $\geq 65$ | 46.22       | (40.90–51.75) | 50.03       | (46.36–53.56) | 0.92                      | (0.80–1.07) | 1.07                      | (0.95–1.23) | 0.86                  | (0.65–1.13)  |
|                         | DM            | 45.88       | (40.28–51.06) | 66.43       | (62.90–69.85) | 1.37                      | (1.17–1.60) | 0.81                      | (0.73–0.92) | 1.68                  | (1.28–2.18)  |
|                         | CKD stage 4–5 | 85.81       | (81.44–90.08) | 58.56       | (54.78–62.32) | 2.07                      | (1.86–2.28) | 0.24                      | (0.19–0.35) | 8.54                  | (5.52–12.04) |
| BMI < 25, Age < 65      | DM            | 43.97       | (37.61–50.23) | 79.16       | (75.94–82.25) | 2.11                      | (1.71–2.60) | 0.71                      | (0.63–0.80) | 2.98                  | (2.16–4.10)  |
|                         | Male          | 70.25       | (64.36–76.30) | 48.74       | (45.05–52.43) | 1.37                      | (1.22–1.55) | 0.61                      | (0.49–0.78) | 2.25                  | (1.57–3.13)  |
|                         | CKD stage 4–5 | 86.39       | (82.09–91.18) | 57.98       | (54.24–61.64) | 2.06                      | (1.85–2.28) | 0.23                      | (0.17–0.35) | 8.76                  | (5.48–13.03) |
| BMI < 25, Age $\geq 65$ | DM            | 38.89       | (32.50–45.35) | 61.41       | (57.40–65.78) | 1.01                      | (0.83–1.26) | 1.00                      | (0.87–1.14) | 1.01                  | (0.72–1.45)  |
|                         | Male          | 68.78       | (62.22–75.48) | 35.92       | (31.91–39.98) | 1.07                      | (0.96–1.21) | 0.87                      | (0.69–1.13) | 1.23                  | (0.85–1.77)  |
|                         | CKD stage 4–5 | 88.39       | (83.42–93.45) | 50.53       | (46.34–54.78) | 1.79                      | (1.61–1.99) | 0.23                      | (0.16–0.40) | 7.77                  | (4.08–12.43) |
| BMI < 25, CKD stage 3   | Age $\geq 65$ | 46.80       | (34.18–59.28) | 58.95       | (55.30–62.51) | 1.14                      | (0.88–1.55) | 0.90                      | (0.73–1.19) | 1.26                  | (0.73–2.13)  |
|                         | DM            | 53.95       | (41.92–67.46) | 73.11       | (69.75–76.28) | 2.01                      | (1.57–2.74) | 0.63                      | (0.49–0.85) | 3.18                  | (1.86–5.59)  |

|                         |               |       |               |       |               |      |             |      |             |       |              |
|-------------------------|---------------|-------|---------------|-------|---------------|------|-------------|------|-------------|-------|--------------|
| BMI < 25, CKD stage 4–5 | Male          | 78.31 | (68.12–88.85) | 39.01 | (35.28–42.58) | 1.28 | (1.12–1.50) | 0.56 | (0.37–1.04) | 2.31  | (1.09–4.07)  |
|                         | Age ≥ 65      | 47.36 | (42.32–52.40) | 51.93 | (47.86–56.24) | 0.99 | (0.86–1.15) | 1.01 | (0.88–1.16) | 0.97  | (0.74–1.30)  |
|                         | DM            | 39.70 | (34.98–44.39) | 69.17 | (65.15–73.24) | 1.29 | (1.06–1.56) | 0.87 | (0.79–0.97) | 1.48  | (1.10–1.99)  |
| BMI < 25, Non-DM        | Male          | 68.41 | (63.91–73.20) | 48.05 | (43.96–52.16) | 1.32 | (1.18–1.47) | 0.66 | (0.55–0.79) | 2.00  | (1.51–2.66)  |
|                         | Age ≥ 65      | 49.22 | (42.89–55.37) | 61.67 | (58.50–64.95) | 1.28 | (1.10–1.52) | 0.82 | (0.72–0.95) | 1.56  | (1.16–2.12)  |
|                         | Male          | 64.47 | (58.76–70.25) | 46.94 | (43.67–50.05) | 1.22 | (1.08–1.37) | 0.76 | (0.64–0.92) | 1.61  | (1.18–2.15)  |
| BMI < 25, DM            | CKD stage 4–5 | 90.54 | (86.87–94.65) | 56.02 | (52.87–59.34) | 2.06 | (1.89–2.25) | 0.17 | (0.12–0.28) | 12.20 | (6.92–18.99) |
|                         | Age ≥ 65      | 43.66 | (36.45–50.88) | 40.49 | (35.49–45.35) | 0.73 | (0.61–0.90) | 1.39 | (1.16–1.69) | 0.53  | (0.36–0.76)  |
|                         | Male          | 76.65 | (70.75–83.07) | 33.30 | (28.42–38.02) | 1.15 | (1.03–1.29) | 0.70 | (0.52–0.98) | 1.64  | (1.05–2.47)  |
| BMI ≥ 25                | CKD stage 4–5 | 83.18 | (78.03–88.66) | 51.29 | (46.12–56.30) | 1.71 | (1.50–1.93) | 0.33 | (0.24–0.48) | 5.21  | (3.17–7.79)  |
|                         | Age ≥ 65      | 41.42 | (35.52–47.57) | 59.04 | (54.75–63.38) | 1.01 | (0.84–1.23) | 0.99 | (0.87–1.14) | 1.02  | (0.74–1.41)  |
|                         | DM            | 63.12 | (57.21–68.92) | 56.59 | (52.30–60.86) | 1.45 | (1.27–1.67) | 0.65 | (0.55–0.78) | 2.23  | (1.64–3.03)  |
| BMI ≥ 25, female        | Male          | 73.90 | (68.66–79.69) | 34.54 | (30.39–38.59) | 1.13 | (1.03–1.25) | 0.76 | (0.59–0.97) | 1.49  | (1.06–2.10)  |
|                         | CKD stage 4–5 | 79.17 | (74.03–84.14) | 64.52 | (60.39–68.57) | 2.23 | (1.94–2.52) | 0.32 | (0.26–0.43) | 6.91  | (4.64–9.63)  |
|                         | Age ≥ 65      | 42.11 | (30.83–53.59) | 60.36 | (53.42–67.18) | 1.06 | (0.79–1.52) | 0.96 | (0.76–1.22) | 1.11  | (0.65–1.98)  |
| BMI ≥ 25, male          | DM            | 63.56 | (52.79–75.51) | 55.40 | (48.28–62.67) | 1.43 | (1.12–1.86) | 0.66 | (0.48–0.96) | 2.17  | (1.19–3.92)  |
|                         | CKD stage 4–5 | 79.85 | (70.42–89.89) | 57.59 | (50.44–64.54) | 1.88 | (1.52–2.31) | 0.35 | (0.23–0.66) | 5.38  | (2.48–10.04) |
|                         | Age ≥ 65      | 41.13 | (34.33–48.12) | 58.35 | (53.12–63.82) | 0.99 | (0.80–1.24) | 1.01 | (0.86–1.18) | 0.98  | (0.68–1.43)  |
| BMI ≥ 25, Age < 65      | DM            | 63.05 | (56.12–69.98) | 57.28 | (51.91–62.62) | 1.48 | (1.25–1.74) | 0.65 | (0.53–0.81) | 2.29  | (1.56–3.30)  |
|                         | CKD stage 4–5 | 79.03 | (72.90–85.14) | 68.26 | (63.13–73.04) | 2.49 | (2.05–2.93) | 0.31 | (0.23–0.44) | 8.11  | (4.95–12.26) |
|                         | DM            | 61.49 | (54.24–69.29) | 60.24 | (54.60–66.19) | 1.55 | (1.27–1.89) | 0.64 | (0.51–0.81) | 2.42  | (1.61–3.67)  |
| BMI ≥ 25, Age ≥ 65      | Male          | 74.27 | (67.27–81.49) | 35.31 | (29.95–40.14) | 1.15 | (1.01–1.31) | 0.73 | (0.54–1.05) | 1.58  | (0.97–2.43)  |
|                         | CKD stage 4–5 | 78.69 | (72.06–85.75) | 69.66 | (64.39–74.78) | 2.59 | (2.09–3.11) | 0.31 | (0.23–0.45) | 8.48  | (4.86–13.13) |
|                         | DM            | 65.28 | (56.41–74.29) | 51.37 | (44.16–58.13) | 1.34 | (1.09–1.65) | 0.68 | (0.51–0.95) | 1.99  | (1.14–3.23)  |
| BMI ≥ 25, CKD stage 3   | Male          | 73.39 | (64.96–81.74) | 33.48 | (27.31–39.74) | 1.1  | (0.95–1.28) | 0.79 | (0.56–1.24) | 1.39  | (0.77–2.29)  |
|                         | CKD stage 4–5 | 79.86 | (72.13–87.93) | 57.13 | (50.49–64.27) | 1.86 | (1.53–2.25) | 0.35 | (0.24–0.58) | 5.28  | (2.85–9.01)  |
|                         | Age ≥ 65      | 39.97 | (26.05–53.19) | 63.75 | (58.55–68.84) | 1.1  | (0.77–1.67) | 0.94 | (0.76–1.25) | 1.17  | (0.62–2.20)  |
|                         | DM            | 74.64 | (63.22–87.19) | 56.26 | (50.97–61.31) | 1.71 | (1.39–2.12) | 0.45 | (0.30–0.83) | 3.79  | (1.76–7.07)  |

|                         |               |       |               |       |               |      |             |      |             |       |              |
|-------------------------|---------------|-------|---------------|-------|---------------|------|-------------|------|-------------|-------|--------------|
| BMI ≥ 25, CKD stage 4–5 | Male          | 74.73 | (63.87–88.73) | 30.84 | (26.02–35.74) | 1.08 | (0.91–1.33) | 0.82 | (0.52–1.51) | 1.32  | (0.61–2.55)  |
|                         | Age ≥ 65      | 41.78 | (35.32–48.48) | 50.40 | (42.95–57.97) | 0.84 | (0.67–1.06) | 1.16 | (0.94–1.40) | 0.73  | (0.48–1.12)  |
|                         | DM            | 59.51 | (52.74–65.91) | 56.66 | (48.87–64.15) | 1.37 | (1.09–1.69) | 0.71 | (0.58–0.90) | 1.92  | (1.24–2.93)  |
| BMI ≥ 25, Non-DM        | Male          | 73.78 | (67.99–79.93) | 41.38 | (34.03–48.50) | 1.26 | (1.08–1.46) | 0.63 | (0.47–0.85) | 1.99  | (1.29–3.10)  |
|                         | Age ≥ 65      | 38.85 | (28.13–48.66) | 62.85 | (57.29–68.31) | 1.05 | (0.78–1.44) | 0.97 | (0.81–1.21) | 1.07  | (0.64–1.77)  |
|                         | Male          | 74.10 | (65.54–83.75) | 33.81 | (28.55–39.42) | 1.12 | (0.97–1.32) | 0.77 | (0.53–1.19) | 1.46  | (0.81–2.51)  |
| BMI ≥ 25, DM            | CKD stage 4–5 | 86.96 | (79.49–94.81) | 64.14 | (58.67–69.72) | 2.42 | (2.01–2.90) | 0.20 | (0.12–0.47) | 11.92 | (4.62–22.37) |
|                         | Age ≥ 65      | 42.84 | (35.32–50.56) | 54.14 | (47.85–60.43) | 0.93 | (0.74–1.19) | 1.06 | (0.88–1.27) | 0.88  | (0.58–1.34)  |
|                         | Male          | 73.83 | (66.98–80.65) | 35.43 | (28.96–41.81) | 1.14 | (1.00–1.31) | 0.74 | (0.55–1.04) | 1.55  | (0.97–2.40)  |
|                         | CKD stage 4–5 | 74.64 | (67.86–81.12) | 64.82 | (58.63–71.47) | 2.12 | (1.72–2.60) | 0.39 | (0.30–0.53) | 5.42  | (3.38–8.54)  |

Diagnostic odds ratio of male, Age ≥65 years, CKD stage 4–5 and DM according to subcohorts for a decline in eGFR by ≥ 50% from baseline or ESRD that requires renal replacement therapy during the follow-up examination period. Abbreviations: CI, confidence interval; DM, diabetes mellitus; BMI, body mass index.

**Appendix Table 6. Multivariate analysis for prognostic factors associated with  $\geq 50\%$  eGFR decline or ESRD in subcohorts stratified by BMI**

| Variable                              | (Full model)    |               |         |                 |               |         | (Final model)   |               |         |                 |               |         |
|---------------------------------------|-----------------|---------------|---------|-----------------|---------------|---------|-----------------|---------------|---------|-----------------|---------------|---------|
|                                       | BMI < 25        |               |         | BMI $\geq 25$   |               |         | BMI < 25        |               |         | BMI $\geq 25$   |               |         |
|                                       | HR <sup>a</sup> | 95% CI        | p value | HR <sup>a</sup> | 95% CI        | p value | HR <sup>a</sup> | 95% CI        | p value | HR <sup>a</sup> | 95% CI        | p value |
| Age (/1 yr)                           | 0.991           | (0.981–1.000) | 0.0505  | 0.987           | (0.973–1.001) | 0.0681  | 0.990           | (0.981–0.999) | 0.0377  | 0.986           | (0.973–0.999) | 0.0328  |
| Male                                  | 2.365           | (1.801–3.106) | <0.0001 | 2.374           | (1.634–3.449) | <0.0001 | 2.629           | (2.098–3.295) | <0.0001 | 2.614           | (1.920–3.559) | <0.0001 |
| BMI (/1 kg/m <sup>2</sup> )           | 0.970           | (0.925–1.017) | 0.2011  | 1.042           | (0.978–1.111) | 0.2048  | 0.978           | (0.936–1.022) | 0.3194  | 1.042           | (0.983–1.105) | 0.1682  |
| eGFR (/1 ml/min/1.73m <sup>2</sup> )  | 0.937           | (0.924–0.951) | <0.0001 | 0.956           | (0.938–0.974) | <0.0001 | 0.934           | (0.921–0.947) | <0.0001 | 0.953           | (0.937–0.970) | <0.0001 |
| MBp (/10 mmHg)                        | 1.063           | (0.968–1.167) | 0.2037  | 0.975           | (0.863–1.103) | 0.6910  |                 |               |         |                 |               |         |
| PP $\times$ HR (/1000 mmHg-beats/min) | 1.134           | (1.032–1.245) | 0.0090  | 1.170           | (1.029–1.330) | 0.0170  | 1.155           | (1.066–1.252) | 0.0005  | 1.137           | (1.017–1.271) | 0.0241  |
| Hemoglobin (/1 g/dl)                  | 0.831           | (0.769–0.897) | <0.0001 | 0.846           | (0.762–0.940) | 0.0018  | 0.829           | (0.772–0.890) | <0.0001 | 0.848           | (0.769–0.936) | 0.0011  |
| Uric acid (/1 mg/dL)                  | 0.933           | (0.876–0.994) | 0.0332  | 1.037           | (0.949–1.133) | 0.4259  |                 |               |         |                 |               |         |
| iPTH (/10 pg/mL)                      | 1.010           | (1.000–1.019) | 0.0437  | 1.014           | (0.999–1.028) | 0.0596  | 1.009           | (1.001–1.018) | 0.0338  | 1.012           | (0.998–1.027) | 0.0865  |
| Log UACR [/1 log(mg/g Cre)]           | 1.855           | (1.650–2.086) | <0.0001 | 2.106           | (1.756–2.526) | <0.0001 | 1.829           | (1.635–2.045) | <0.0001 | 1.946           | (1.661–2.281) | <0.0001 |
| ALT (/1 IU/L)                         | 0.999           | (0.989–1.009) | 0.8152  | 0.991           | (0.978–1.004) | 0.1635  |                 |               |         |                 |               |         |
| Phosphorus (/1 mg/dL)                 | 1.465           | (1.226–1.751) | <0.0001 | 1.524           | (1.246–1.865) | <0.0001 | 1.410           | (1.216–1.636) | <0.0001 | 1.377           | (1.146–1.654) | 0.0006  |
| Albumin (/1 g/dL)                     | 0.772           | (0.599–0.996) | 0.0467  | 0.649           | (0.462–0.911) | 0.0125  | 0.778           | (0.618–0.980) | 0.0331  | 0.692           | (0.512–0.934) | 0.0162  |
| HDL cholesterol (/10 mg/dL)           | 0.970           | (0.908–1.036) | 0.3631  | 0.939           | (0.828–1.064) | 0.3219  |                 |               |         |                 |               |         |
| UCACR (/100 mg/g Cre)                 | 0.990           | (0.759–1.291) | 0.9417  | 1.602           | (0.972–2.640) | 0.0644  |                 |               |         |                 |               |         |
| UPCR (/100 mg/g Cre)                  | 0.975           | (0.900–1.056) | 0.5319  | 0.890           | (0.798–0.992) | 0.0355  |                 |               |         |                 |               |         |
| e24hUK (/10 mEq/day)                  | 0.702           | (0.578–0.853) | 0.0004  | 0.841           | (0.642–1.101) | 0.2067  | 0.701           | (0.598–0.821) | <0.0001 | 0.850           | (0.693–1.042) | 0.1173  |
| Potassium (/1 mEq/L)                  | 1.116           | (0.942–1.322) | 0.2034  | 1.052           | (0.832–1.328) | 0.6735  |                 |               |         |                 |               |         |
| Diabetes mellitus                     | 1.035           | (0.817–1.312) | 0.7757  | 0.899           | (0.648–1.247) | 0.5241  |                 |               |         |                 |               |         |
| Diuretics use                         | 0.910           | (0.713–1.161) | 0.4466  | 0.931           | (0.684–1.267) | 0.6475  |                 |               |         |                 |               |         |
| Hypertension                          | 1.075           | (0.650–1.780) | 0.7774  | 0.635           | (0.227–1.782) | 0.3885  |                 |               |         |                 |               |         |

Variables with p-values of <0.1 in the univariate model in total cohort were included in the multivariate model. Multivariate Cox regression analyses using backward selection were performed in the final model. Abbreviations: eGFR, estimated glomerular filtration rate; BMI, body mass index; HR<sup>a</sup>, hazard ratio; CI, confidence interval; MBP, mean blood pressure; PP  $\times$  HR, pulse pressure  $\times$  heart rate; iPTH, intact parathyroid hormone; UACR, urine albumin-to-creatinine ratio; ALT, alanine aminotransferase; HDL, high-density lipoprotein; UCACR, urine calcium-to-creatinine ratio; UPCR, estimated 24-hour urinary sodium excretion; e24hUK, estimated 24-hour urinary potassium excretion

**Appendix Table 7A. Multivariate analysis for prognostic factors associated with  $\geq 50\%$  eGFR decline or ESRD in subcohorts cross-classified by sex and BMI**

| Variable                              | (Final model)   |               |         |                      |               |         |                  |               |         |                        |               |         |
|---------------------------------------|-----------------|---------------|---------|----------------------|---------------|---------|------------------|---------------|---------|------------------------|---------------|---------|
|                                       | BMI < 25, Male  |               |         | BMI $\geq 25$ , Male |               |         | BMI < 25, Female |               |         | BMI $\geq 25$ , Female |               |         |
|                                       | HR <sup>a</sup> | 95% CI        | p value | HR <sup>a</sup>      | 95% CI        | p value | HR <sup>a</sup>  | 95% CI        | p value | HR <sup>a</sup>        | 95% CI        | p value |
| Age (/1 yr)                           | 0.989           | (0.978–1.000) | 0.0489  | 0.984                | (0.969–0.999) | 0.0408  | 0.992            | (0.976–1.009) | 0.3510  | 0.994                  | (0.969–1.021) | 0.6744  |
| BMI (/1 kg/m <sup>2</sup> )           | 0.992           | (0.935–1.052) | 0.7853  | 1.068                | (0.997–1.144) | 0.0619  | 0.967            | (0.905–1.034) | 0.3317  | 0.985                  | (0.876–1.107) | 0.8021  |
| eGFR (/1 ml/min/1.73m <sup>2</sup> )  | 0.940           | (0.925–0.956) | <0.0001 | 0.947                | (0.927–0.968) | <0.0001 | 0.915            | (0.888–0.943) | <0.0001 | 0.971                  | (0.938–1.006) | 0.1032  |
| PP $\times$ HR (/1000 mmHg-beats/min) | 1.118           | (1.006–1.244) | 0.0389  | 1.143                | (1.003–1.302) | 0.0446  | 1.194            | (1.054–1.353) | 0.0053  | 1.145                  | (0.890–1.472) | 0.2918  |
| Hemoglobin (/1 g/dl)                  | 0.839           | (0.772–0.911) | <0.0001 | 0.853                | (0.763–0.955) | 0.0055  | 0.796            | (0.694–0.913) | 0.0011  | 0.805                  | (0.647–1.000) | 0.0499  |
| iPTH (/10 pg/mL)                      | 1.018           | (1.005–1.032) | 0.0089  | 1.016                | (0.999–1.033) | 0.0684  | 1.001            | (0.988–1.014) | 0.8653  | 1.011                  | (0.978–1.045) | 0.5101  |
| Log UACR [/1 log(mg/g Cre)]           | 1.881           | (1.629–2.173) | <0.0001 | 1.794                | (1.484–2.169) | <0.0001 | 1.685            | (1.412–2.012) | <0.0001 | 2.374                  | (1.693–3.327) | <0.0001 |
| Phosphorus (/1 mg/dL)                 | 1.439           | (1.203–1.721) | <0.0001 | 1.295                | (1.055–1.590) | 0.0135  | 1.342            | (1.020–1.767) | 0.0357  | 1.887                  | (1.055–3.376) | 0.0325  |
| Albumin (/1 g/dL)                     | 0.846           | (0.647–1.106) | 0.2212  | 0.617                | (0.438–0.871) | 0.0060  | 0.525            | (0.332–0.831) | 0.0060  | 0.886                  | (0.382–2.057) | 0.7775  |
| e24hUK (/10 mEq/day)                  | 0.663           | (0.547–0.803) | <0.0001 | 0.796                | (0.629–1.008) | 0.0582  | 0.816            | (0.618–1.077) | 0.1509  | 1.000                  | (0.639–1.566) | 0.9988  |

**Appendix Table 7B. Multivariate analysis for prognostic factors associated with  $\geq 50\%$  eGFR decline or ESRD in subcohorts cross-classified by age and BMI**

| Variable                              | (Final model)      |               |         |                          |               |         |                         |               |         |                               |               |         |
|---------------------------------------|--------------------|---------------|---------|--------------------------|---------------|---------|-------------------------|---------------|---------|-------------------------------|---------------|---------|
|                                       | BMI < 25, Age < 65 |               |         | BMI $\geq 25$ , Age < 65 |               |         | BMI < 25, Age $\geq 65$ |               |         | BMI $\geq 25$ , Age $\geq 65$ |               |         |
|                                       | HR <sup>a</sup>    | 95% CI        | p value | HR <sup>a</sup>          | 95% CI        | p value | HR <sup>a</sup>         | 95% CI        | p value | HR <sup>a</sup>               | 95% CI        | p value |
| Age (/1 yr)                           | 0.990              | (0.976–1.005) | 0.1930  | 0.973                    | (0.954–0.992) | 0.0055  | 1.036                   | (0.993–1.080) | 0.1015  | 0.993                         | (0.937–1.053) | 0.8207  |
| Male                                  | 3.130              | (2.305–4.251) | <0.0001 | 2.591                    | (1.723–3.895) | <0.0001 | 2.148                   | (1.527–3.022) | <0.0001 | 2.973                         | (1.778–4.971) | <0.0001 |
| BMI (/1 kg/m <sup>2</sup> )           | 0.971              | (0.914–1.030) | 0.3251  | 1.010                    | (0.939–1.085) | 0.7953  | 0.983                   | (0.921–1.049) | 0.5958  | 1.150                         | (1.032–1.280) | 0.0111  |
| eGFR (/1 ml/min/1.73m <sup>2</sup> )  | 0.923              | (0.905–0.941) | <0.0001 | 0.951                    | (0.930–0.972) | <0.0001 | 0.942                   | (0.922–0.962) | <0.0001 | 0.956                         | (0.928–0.984) | 0.0024  |
| PP $\times$ HR (/1000 mmHg-beats/min) | 1.146              | (1.019–1.290) | 0.0230  | 1.060                    | (0.914–1.229) | 0.4410  | 1.150                   | (1.026–1.288) | 0.0160  | 1.226                         | (1.027–1.464) | 0.0240  |
| Hemoglobin (/1 g/dl)                  | 0.826              | (0.751–0.908) | <0.0001 | 0.923                    | (0.821–1.038) | 0.1822  | 0.808                   | (0.721–0.905) | 0.0002  | 0.682                         | (0.569–0.817) | <0.0001 |
| iPTH (/10 pg/mL)                      | 1.009              | (0.998–1.019) | 0.0960  | 1.012                    | (0.993–1.031) | 0.2264  | 1.009                   | (0.992–1.027) | 0.3103  | 1.015                         | (0.992–1.039) | 0.2021  |
| Log UACR [/1 log(mg/g Cre)]           | 1.844              | (1.570–2.165) | <0.0001 | 2.101                    | (1.659–2.662) | <0.0001 | 1.847                   | (1.582–2.155) | <0.0001 | 1.923                         | (1.539–2.401) | <0.0001 |
| Phosphorus (/1 mg/dL)                 | 1.367              | (1.124–1.661) | 0.0017  | 1.492                    | (1.212–1.836) | 0.0002  | 1.384                   | (1.081–1.772) | 0.0100  | 1.176                         | (0.763–1.811) | 0.4623  |

|                      |       |               |        |       |               |        |       |               |         |       |               |        |
|----------------------|-------|---------------|--------|-------|---------------|--------|-------|---------------|---------|-------|---------------|--------|
| Albumin (/1 g/dL)    | 0.738 | (0.547–0.995) | 0.0464 | 0.670 | (0.452–0.992) | 0.0457 | 0.808 | (0.565–1.158) | 0.2459  | 0.625 | (0.364–1.072) | 0.0875 |
| e24hUK (/10 mEq/day) | 0.790 | (0.631–0.988) | 0.0391 | 0.884 | (0.685–1.142) | 0.3444 | 0.633 | (0.503–0.795) | <0.0001 | 0.817 | (0.572–1.166) | 0.2643 |

**Appendix Table 7C. Multivariate analysis for prognostic factors associated with ≥ 50% eGFR decline or ESRD in subcohorts cross-classified by CKD stage and BMI**

| Variable                             | (Final model)         |               |         |                       |               |         |                         |               |         |                         |               |         |
|--------------------------------------|-----------------------|---------------|---------|-----------------------|---------------|---------|-------------------------|---------------|---------|-------------------------|---------------|---------|
|                                      | BMI < 25, CKD stage 3 |               |         | BMI ≥ 25, CKD stage 3 |               |         | BMI < 25, CKD stage 4–5 |               |         | BMI ≥ 25, CKD stage 4–5 |               |         |
|                                      | HR <sup>a</sup>       | 95% CI        | p value | HR <sup>a</sup>       | 95% CI        | p value | HR <sup>a</sup>         | 95% CI        | p value | HR <sup>a</sup>         | 95% CI        | p value |
| Age (/1 yr)                          | 1.002                 | (0.977–1.028) | 0.8535  | 0.984                 | (0.960–1.009) | 0.2007  | 0.986                   | (0.977–0.996) | 0.0066  | 0.984                   | (0.969–0.999) | 0.0387  |
| Male                                 | 2.121                 | (1.106–4.070) | 0.0237  | 2.184                 | (1.087–4.389) | 0.0283  | 2.741                   | (2.151–3.494) | <0.0001 | 2.921                   | (2.055–4.152) | <0.0001 |
| BMI (/1 kg/m <sup>2</sup> )          | 0.934                 | (0.823–1.061) | 0.2940  | 0.985                 | (0.875–1.109) | 0.8000  | 0.984                   | (0.939–1.032) | 0.5057  | 1.071                   | (1.001–1.146) | 0.0478  |
| eGFR (/1 ml/min/1.73m <sup>2</sup> ) | 0.978                 | (0.937–1.021) | 0.3107  | 0.991                 | (0.948–1.036) | 0.6933  | 0.915                   | (0.895–0.936) | <0.0001 | 0.928                   | (0.895–0.961) | <0.0001 |
| PP × HR (/1000 mmHg-beats/min)       | 1.305                 | (1.062–1.604) | 0.0113  | 1.269                 | (0.991–1.625) | 0.0587  | 1.132                   | (1.036–1.237) | 0.0061  | 1.141                   | (1.009–1.291) | 0.0361  |
| Hemoglobin (/1 g/dl)                 | 0.942                 | (0.788–1.125) | 0.5084  | 0.873                 | (0.715–1.065) | 0.1794  | 0.806                   | (0.743–0.874) | <0.0001 | 0.842                   | (0.752–0.943) | 0.0029  |
| iPTH (/10 pg/mL)                     | 1.035                 | (0.961–1.116) | 0.3641  | 1.035                 | (0.952–1.125) | 0.4190  | 1.005                   | (0.996–1.015) | 0.2475  | 1.004                   | (0.988–1.020) | 0.6464  |
| Log UACR [/1 log(mg/g Cre)]          | 1.775                 | (1.337–2.358) | <0.0001 | 2.45                  | (1.735–3.458) | <0.0001 | 1.825                   | (1.613–2.066) | <0.0001 | 1.749                   | (1.462–2.093) | <0.0001 |
| Phosphorus (/1 mg/dL)                | 1.232                 | (0.696–2.180) | 0.4744  | 1.208                 | (0.789–1.848) | 0.3843  | 1.403                   | (1.199–1.642) | <0.0001 | 1.402                   | (1.099–1.789) | 0.0066  |
| Albumin (/1 g/dL)                    | 0.381                 | (0.204–0.711) | 0.0024  | 0.605                 | (0.293–1.252) | 0.1759  | 0.881                   | (0.683–1.136) | 0.3291  | 0.680                   | (0.484–0.956) | 0.0263  |
| e24hUK (/10 mEq/day)                 | 0.800                 | (0.535–1.197) | 0.2779  | 1.125                 | (0.736–1.720) | 0.5871  | 0.705                   | (0.592–0.840) | <0.0001 | 0.834                   | (0.662–1.051) | 0.1249  |

**Appendix Table 7D. Multivariate analysis for prognostic factors associated with ≥ 50% eGFR decline or ESRD in subcohorts cross-classified by DM status and BMI**

| Variable                             | (Final model)    |               |         |                  |               |         |                 |               |         |                 |               |         |
|--------------------------------------|------------------|---------------|---------|------------------|---------------|---------|-----------------|---------------|---------|-----------------|---------------|---------|
|                                      | BMI < 25, Non-DM |               |         | BMI ≥ 25, Non-DM |               |         | BMI < 25, DM    |               |         | BMI ≥ 25, DM    |               |         |
|                                      | HR <sup>a</sup>  | 95% CI        | p value | HR <sup>a</sup>  | 95% CI        | p value | HR <sup>a</sup> | 95% CI        | p value | HR <sup>a</sup> | 95% CI        | p value |
| Age (/1 yr)                          | 0.991            | (0.980–1.002) | 0.1066  | 0.982            | (0.962–1.002) | 0.0751  | 0.984           | (0.967–1.001) | 0.0625  | 0.990           | (0.973–1.007) | 0.2582  |
| Male                                 | 2.927            | (2.174–3.940) | <0.0001 | 3.417            | (1.920–6.079) | <0.0001 | 2.274           | (1.579–3.275) | <0.0001 | 2.383           | (1.618–3.512) | <0.0001 |
| BMI (/1 kg/m <sup>2</sup> )          | 1.019            | (0.961–1.079) | 0.5346  | 1.055            | (0.948–1.173) | 0.3278  | 0.924           | (0.860–0.992) | 0.0291  | 1.037           | (0.964–1.116) | 0.3286  |
| eGFR (/1 ml/min/1.73m <sup>2</sup> ) | 0.922            | (0.904–0.941) | <0.0001 | 0.943            | (0.913–0.975) | 0.0005  | 0.952           | (0.933–0.972) | <0.0001 | 0.961           | (0.941–0.982) | 0.0003  |
| PP × HR (/1000 mmHg-beats/min)       | 1.153            | (1.030–1.290) | 0.0134  | 1.071            | (0.859–1.335) | 0.5407  | 1.156           | (1.022–1.308) | 0.0213  | 1.177           | (1.026–1.351) | 0.0201  |

|                             |       |               |         |       |               |         |       |               |         |       |               |         |
|-----------------------------|-------|---------------|---------|-------|---------------|---------|-------|---------------|---------|-------|---------------|---------|
| Hemoglobin (/1 g/dl)        | 0.790 | (0.713–0.874) | <0.0001 | 0.815 | (0.695–0.956) | 0.0118  | 0.872 | (0.786–0.967) | 0.0098  | 0.871 | (0.766–0.991) | 0.0358  |
| iPTH (/10 pg/mL)            | 1.003 | (0.991–1.014) | 0.6429  | 1.013 | (0.986–1.041) | 0.3415  | 1.025 | (1.007–1.043) | 0.0068  | 1.014 | (0.996–1.032) | 0.1178  |
| Log UACR [/1 log(mg/g Cre)] | 1.787 | (1.545–2.067) | <0.0001 | 1.893 | (1.429–2.508) | <0.0001 | 1.829 | (1.533–2.181) | <0.0001 | 1.972 | (1.599–2.434) | <0.0001 |
| Phosphorus (/1 mg/dL)       | 1.435 | (1.166–1.766) | 0.0007  | 1.705 | (1.014–2.866) | 0.0441  | 1.385 | (1.098–1.748) | 0.0060  | 1.331 | (1.074–1.649) | 0.0091  |
| Albumin (/1 g/dL)           | 0.775 | (0.546–1.100) | 0.1529  | 0.514 | (0.289–0.914) | 0.0234  | 0.728 | (0.526–1.006) | 0.0540  | 0.761 | (0.526–1.100) | 0.1460  |
| e24hUK (/10 mEq/day)        | 0.718 | (0.588–0.878) | 0.0012  | 0.857 | (0.552–1.330) | 0.4898  | 0.676 | (0.522–0.874) | 0.0028  | 0.845 | (0.658–1.083) | 0.1833  |

Variables with p-values of <0.1 in the univariate model in the total cohort were included in the multivariate model. Multivariate Cox regression analyses using backward selection were performed in final model. Abbreviations: eGFR, estimated glomerular filtration rate; BMI, body mass index; HR<sup>a</sup>, hazard ratio; CI, confidence interval; PP × HR, pulse pressure x heart rate; iPTH, intact para thyroid hormone; UACR, urine albumin-to-creatinine ratio; e24hUK, estimated 24-hour urinary potassium excretion; DM, diabetes mellitus.

**Appendix Table 8. Predictive characteristics of prognostic factors based on the cut-off values in respective cohorts for  $\geq 50\%$  eGFR decline or ESRD**

| Cohort           | Positive                     | Sensitivity |               | Specificity |               | Positive likelihood ratio |             | Negative likelihood ratio |             | Diagnostic odds ratio |             |
|------------------|------------------------------|-------------|---------------|-------------|---------------|---------------------------|-------------|---------------------------|-------------|-----------------------|-------------|
|                  |                              | (%)         | 95%CI         | (%)         | 95%CI         | Value                     | 95%CI       | Value                     | 95%CI       | Value                 | 95%CI       |
| Overall          | Alb $\leq 3.9$               | 62.43       | (58.80–66.02) | 64.85       | (62.70–67.12) | 1.78                      | (1.62–1.94) | 0.58                      | (0.52–0.65) | 3.07                  | (2.52–3.70) |
|                  | Hb $\leq 11.3$               | 59.05       | (55.54–62.89) | 72.57       | (70.53–74.62) | 2.15                      | (1.95–2.38) | 0.56                      | (0.51–0.62) | 3.81                  | (3.18–4.61) |
|                  | 95 $\leq$ iPTH               | 66.17       | (62.53–69.84) | 72.03       | (69.83–74.14) | 2.37                      | (2.14–2.61) | 0.47                      | (0.42–0.53) | 5.04                  | (4.12–6.15) |
|                  | e24hUK $\leq 36.8$           | 52.25       | (48.45–56.15) | 62.02       | (59.75–64.39) | 1.38                      | (1.25–1.53) | 0.77                      | (0.70–0.84) | 1.79                  | (1.49–2.17) |
|                  | 865.2 $\leq$ UACR            | 68.73       | (65.08–72.43) | 78.16       | (76.19–80.27) | 3.15                      | (2.82–3.52) | 0.40                      | (0.36–0.45) | 7.86                  | (6.40–9.63) |
|                  | 3.6 $\leq$ P                 | 65.08       | (61.45–68.90) | 60.29       | (57.89–62.81) | 1.64                      | (1.50–1.79) | 0.58                      | (0.52–0.65) | 2.83                  | (2.33–3.45) |
|                  | 4216.0 $\leq$ PP $\times$ HR | 58.31       | (54.09–62.22) | 62.98       | (60.52–65.33) | 1.58                      | (1.42–1.73) | 0.66                      | (0.60–0.74) | 2.38                  | (1.93–2.90) |
| BMI < 25         | Alb $\leq 3.9$               | 63.74       | (59.16–68.60) | 64.82       | (62.17–67.39) | 1.81                      | (1.62–2.02) | 0.56                      | (0.49–0.65) | 3.24                  | (2.52–4.10) |
|                  | Hb $\leq 11.3$               | 66.25       | (61.73–70.77) | 68.57       | (66.04–71.25) | 2.11                      | (1.88–2.35) | 0.49                      | (0.43–0.57) | 4.28                  | (3.32–5.43) |
|                  | 96 $\leq$ iPTH               | 65.72       | (61.07–70.30) | 71.66       | (69.10–74.24) | 2.32                      | (2.05–2.60) | 0.48                      | (0.42–0.56) | 4.85                  | (3.68–6.17) |
|                  | e24hUK $\leq 36.7$           | 60.91       | (56.01–65.63) | 57.93       | (55.16–60.86) | 1.45                      | (1.30–1.62) | 0.67                      | (0.59–0.78) | 2.15                  | (1.67–2.73) |
|                  | 661.4 $\leq$ UACR            | 72.98       | (69.00–77.27) | 71.03       | (68.36–73.82) | 2.52                      | (2.25–2.80) | 0.38                      | (0.33–0.45) | 6.62                  | (5.17–8.47) |
|                  | 3.6 $\leq$ P                 | 67.93       | (63.39–72.56) | 59.56       | (56.75–62.62) | 1.68                      | (1.52–1.86) | 0.54                      | (0.46–0.63) | 3.12                  | (2.41–4.01) |
|                  | 4240.2 $\leq$ PP $\times$ HR | 57.10       | (52.01–61.97) | 65.61       | (62.73–68.38) | 1.66                      | (1.46–1.87) | 0.65                      | (0.58–0.75) | 2.54                  | (1.96–3.19) |
| BMI < 25, female | Alb $\leq 3.9$               | 57.07       | (48.81–65.34) | 64.34       | (60.30–68.43) | 1.60                      | (1.32–1.95) | 0.67                      | (0.55–0.84) | 2.40                  | (1.60–3.52) |
|                  | Hb $\leq 10.6$               | 65.97       | (57.12–74.92) | 75.97       | (72.55–79.56) | 2.75                      | (2.24–3.35) | 0.45                      | (0.35–0.61) | 6.13                  | (3.81–9.37) |
|                  | 98 $\leq$ iPTH               | 66.37       | (57.89–74.73) | 66.27       | (62.13–70.36) | 1.97                      | (1.64–2.34) | 0.51                      | (0.40–0.69) | 3.88                  | (2.44–5.78) |
|                  | e24hUK $\leq 35.5$           | 64.48       | (56.54–73.35) | 58.24       | (53.96–62.51) | 1.54                      | (1.32–1.85) | 0.61                      | (0.48–0.79) | 2.53                  | (1.69–3.84) |
|                  | 658.5 $\leq$ UACR            | 67.51       | (59.12–75.42) | 69.42       | (65.52–73.45) | 2.21                      | (1.83–2.66) | 0.47                      | (0.37–0.63) | 4.72                  | (2.98–7.05) |
|                  | 4.0 $\leq$ P                 | 55.68       | (46.61–64.28) | 66.66       | (62.26–70.99) | 1.67                      | (1.35–2.08) | 0.66                      | (0.54–0.85) | 2.51                  | (1.62–3.80) |
|                  | 4141.5 $\leq$ PP $\times$ HR | 61.97       | (53.06–70.97) | 60.05       | (55.81–64.51) | 1.55                      | (1.29–1.87) | 0.63                      | (0.51–0.84) | 2.45                  | (1.54–3.68) |
| BMI < 25, male   | Alb $\leq 3.9$               | 66.85       | (61.41–72.40) | 65.27       | (61.79–68.71) | 1.92                      | (1.69–2.20) | 0.51                      | (0.43–0.61) | 3.79                  | (2.80–5.04) |
|                  | Hb $\leq 11.7$               | 70.54       | (65.18–75.76) | 68.81       | (65.47–72.20) | 2.26                      | (1.96–2.57) | 0.43                      | (0.36–0.53) | 5.28                  | (3.76–7.02) |
|                  | 96 $\leq$ iPTH               | 65.48       | (59.62–71.16) | 76.65       | (73.45–79.91) | 2.80                      | (2.36–3.31) | 0.45                      | (0.38–0.54) | 6.23                  | (4.49–8.54) |



|                         |                  |       |               |       |               |      |             |      |             |      |              |
|-------------------------|------------------|-------|---------------|-------|---------------|------|-------------|------|-------------|------|--------------|
| BMI < 25, Age < 65      | e24hUK ≤ 36.8    | 58.74 | (52.83–64.46) | 61.96 | (57.95–65.55) | 1.54 | (1.32–1.78) | 0.67 | (0.57–0.79) | 2.32 | (1.68–3.12)  |
|                         | 588.4 ≤ UACR     | 78.00 | (73.45–82.81) | 70.26 | (66.71–73.93) | 2.62 | (2.29–3.00) | 0.31 | (0.25–0.39) | 8.37 | (6.03–11.48) |
|                         | 3.5 ≤ P          | 69.18 | (63.38–74.65) | 69.39 | (65.73–73.19) | 2.26 | (1.93–2.61) | 0.44 | (0.37–0.55) | 5.09 | (3.58–6.92)  |
|                         | 4300.0 ≤ PP × HR | 56.15 | (50.21–62.02) | 69.21 | (65.48–72.93) | 1.82 | (1.53–2.16) | 0.63 | (0.55–0.75) | 2.88 | (2.06–3.89)  |
|                         | Alb ≤ 3.9        | 61.51 | (55.44–68.09) | 68.96 | (65.48–72.40) | 1.98 | (1.69–2.33) | 0.56 | (0.47–0.67) | 3.55 | (2.57–4.93)  |
|                         | Hb ≤ 11.3        | 61.61 | (55.52–67.95) | 73.24 | (69.98–76.65) | 2.30 | (1.95–2.71) | 0.52 | (0.44–0.63) | 4.39 | (3.14–5.99)  |
|                         | 95 ≤ iPTH        | 68.85 | (62.79–75.04) | 71.31 | (67.60–74.70) | 2.40 | (2.02–2.81) | 0.44 | (0.36–0.55) | 5.49 | (3.79–7.64)  |
|                         | e24hUK ≤ 37.3    | 57.95 | (51.58–64.45) | 57.56 | (53.73–61.45) | 1.37 | (1.19–1.59) | 0.73 | (0.62–0.88) | 1.87 | (1.35–2.57)  |
|                         | 901.7 ≤ UACR     | 68.09 | (62.05–74.20) | 79.22 | (76.01–82.57) | 3.28 | (2.71–3.94) | 0.40 | (0.34–0.50) | 8.14 | (5.57–11.47) |
|                         | 3.6 ≤ P          | 65.35 | (58.84–71.67) | 60.99 | (57.16–64.95) | 1.68 | (1.44–1.94) | 0.57 | (0.47–0.71) | 2.95 | (2.03–4.10)  |
| BMI < 25, Age ≥ 65      | 3828.0 ≤ PP × HR | 65.35 | (58.90–71.99) | 59.95 | (56.28–63.99) | 1.63 | (1.41–1.89) | 0.58 | (0.48–0.72) | 2.82 | (1.99–3.95)  |
|                         | Alb ≤ 3.9        | 65.94 | (58.66–72.83) | 59.75 | (55.73–63.80) | 1.64 | (1.41–1.92) | 0.57 | (0.46–0.73) | 2.87 | (1.95–4.11)  |
|                         | Hb ≤ 11.1        | 66.06 | (59.18–72.62) | 67.54 | (63.69–71.38) | 2.03 | (1.72–2.41) | 0.50 | (0.41–0.63) | 4.05 | (2.76–5.77)  |
|                         | 87 ≤ iPTH        | 69.08 | (62.07–75.67) | 65.68 | (61.71–69.80) | 2.01 | (1.71–2.36) | 0.47 | (0.38–0.61) | 4.27 | (2.85–6.16)  |
|                         | e24hUK ≤ 36.7    | 69.23 | (62.23–76.10) | 54.33 | (49.87–58.65) | 1.52 | (1.31–1.75) | 0.57 | (0.45–0.74) | 2.68 | (1.80–3.84)  |
| BMI < 25, CKD stage 3   | 531.6 ≤ UACR     | 76.60 | (70.92–82.52) | 69.33 | (65.25–73.44) | 2.50 | (2.12–2.90) | 0.34 | (0.27–0.45) | 7.40 | (4.90–10.53) |
|                         | 3.6 ≤ P          | 70.56 | (64.00–76.76) | 57.89 | (53.70–62.24) | 1.68 | (1.45–1.96) | 0.51 | (0.41–0.66) | 3.29 | (2.23–4.78)  |
|                         | 4416.0 ≤ PP × HR | 56.18 | (49.34–63.99) | 62.18 | (57.57–66.69) | 1.49 | (1.25–1.80) | 0.70 | (0.59–0.85) | 2.11 | (1.48–3.05)  |
|                         | Alb ≤ 3.8        | 74.95 | (62.51–87.45) | 76.47 | (73.36–79.67) | 3.19 | (2.55–3.97) | 0.33 | (0.22–0.66) | 9.72 | (4.09–17.83) |
|                         | Hb ≤ 11.8        | 53.27 | (39.88–65.77) | 68.79 | (65.53–72.24) | 1.71 | (1.33–2.28) | 0.68 | (0.53–0.95) | 2.51 | (1.42–4.26)  |
|                         | 63 ≤ iPTH        | 62.18 | (49.71–76.06) | 59.16 | (55.31–62.80) | 1.52 | (1.24–2.00) | 0.64 | (0.46–0.97) | 2.38 | (1.28–4.32)  |
|                         | e24hUK ≤ 39.1    | 58.41 | (45.08–71.80) | 56.67 | (53.03–60.69) | 1.35 | (1.08–1.80) | 0.73 | (0.54–1.09) | 1.84 | (1.00–3.30)  |
| BMI < 25, CKD stage 4–5 | 519.6 ≤ UACR     | 77.91 | (67.91–89.61) | 71.71 | (68.23–75.26) | 2.75 | (2.29–3.35) | 0.31 | (0.20–0.56) | 8.94 | (4.20–16.19) |
|                         | 3.4 ≤ P          | 58.33 | (44.62–71.97) | 54.82 | (51.02–58.88) | 1.29 | (1.02–1.72) | 0.76 | (0.56–1.15) | 1.70 | (0.88–3.06)  |
|                         | 4252.5 ≤ PP × HR | 61.99 | (47.51–76.46) | 68.67 | (65.16–72.51) | 1.98 | (1.53–2.65) | 0.55 | (0.40–0.91) | 3.58 | (1.72–6.64)  |
|                         | Alb ≤ 3.8        | 51.31 | (46.27–56.46) | 71.54 | (67.61–75.37) | 1.80 | (1.51–2.15) | 0.68 | (0.60–0.77) | 2.65 | (1.96–3.54)  |
|                         | Hb ≤ 11.0        | 61.64 | (56.58–66.59) | 63.66 | (59.56–67.60) | 1.70 | (1.47–1.96) | 0.60 | (0.52–0.71) | 2.81 | (2.10–3.71)  |
|                         | 113 ≤ iPTH       | 63.25 | (57.98–68.58) | 62.54 | (58.30–66.90) | 1.69 | (1.45–1.94) | 0.59 | (0.50–0.70) | 2.87 | (2.10–3.85)  |
|                         |                  |       |               |       |               |      |             |      |             |      |              |

|                  |                  |       |               |       |               |      |             |      |             |      |              |
|------------------|------------------|-------|---------------|-------|---------------|------|-------------|------|-------------|------|--------------|
| BMI < 25, Non-DM | e24hUK ≤ 36.7    | 63.48 | (58.57–68.30) | 48.04 | (43.64–52.20) | 1.22 | (1.08–1.38) | 0.76 | (0.64–0.91) | 1.61 | (1.20–2.14)  |
|                  | 861.6 ≤ UACR     | 65.93 | (61.13–70.85) | 74.17 | (70.06–78.17) | 2.55 | (2.11–3.01) | 0.46 | (0.40–0.54) | 5.56 | (4.01–7.47)  |
|                  | 3.6 ≤ P          | 71.39 | (66.43–76.17) | 50.71 | (46.46–55.23) | 1.45 | (1.29–1.63) | 0.56 | (0.47–0.69) | 2.57 | (1.87–3.46)  |
|                  | 4524.0 ≤ PP × HR | 50.43 | (44.98–55.55) | 72.11 | (68.20–76.54) | 1.81 | (1.49–2.17) | 0.69 | (0.61–0.79) | 2.63 | (1.92–3.54)  |
|                  | Alb ≤ 3.9        | 55.01 | (48.51–61.66) | 64.79 | (61.71–68.04) | 1.56 | (1.35–1.83) | 0.69 | (0.60–0.82) | 2.25 | (1.65–3.05)  |
|                  | Hb ≤ 11.3        | 63.76 | (57.53–69.96) | 72.04 | (68.97–74.94) | 2.28 | (1.96–2.64) | 0.50 | (0.43–0.61) | 4.53 | (3.24–6.08)  |
|                  | 95 ≤ iPTH        | 69.29 | (63.37–75.42) | 71.06 | (67.89–74.17) | 2.39 | (2.07–2.75) | 0.43 | (0.36–0.53) | 5.54 | (3.99–7.58)  |
| BMI < 25, DM     | e24hUK ≤ 36.5    | 65.48 | (59.41–72.16) | 57.10 | (53.72–60.43) | 1.53 | (1.34–1.74) | 0.60 | (0.50–0.74) | 2.53 | (1.81–3.45)  |
|                  | 584.6 ≤ UACR     | 70.95 | (65.45–76.88) | 70.10 | (67.04–73.44) | 2.37 | (2.07–2.72) | 0.41 | (0.34–0.52) | 5.73 | (4.11–7.84)  |
|                  | 3.6 ≤ P          | 64.74 | (58.49–71.26) | 60.87 | (57.45–64.41) | 1.65 | (1.44–1.90) | 0.58 | (0.48–0.71) | 2.86 | (2.05–3.90)  |
|                  | 3828.0 ≤ PP × HR | 61.19 | (54.21–68.13) | 57.11 | (53.85–60.38) | 1.43 | (1.24–1.66) | 0.68 | (0.57–0.84) | 2.10 | (1.50–2.92)  |
|                  | Alb ≤ 3.8        | 66.94 | (59.87–73.88) | 72.95 | (68.12–77.42) | 2.47 | (1.96–3.01) | 0.45 | (0.37–0.58) | 5.46 | (3.50–7.98)  |
|                  | Hb ≤ 11.0        | 64.09 | (56.86–71.05) | 68.00 | (63.34–72.85) | 2.00 | (1.64–2.40) | 0.53 | (0.44–0.67) | 3.79 | (2.52–5.45)  |
|                  | 81 ≤ iPTH        | 73.29 | (66.84–80.22) | 63.45 | (58.21–68.61) | 2.01 | (1.68–2.37) | 0.42 | (0.33–0.56) | 4.76 | (3.09–7.02)  |
| BMI ≥ 25         | e24hUK ≤ 38.1    | 63.65 | (56.49–71.14) | 53.95 | (48.63–59.08) | 1.38 | (1.17–1.65) | 0.67 | (0.54–0.86) | 2.05 | (1.39–3.07)  |
|                  | 996.3 ≤ UACR     | 71.74 | (65.23–78.27) | 75.96 | (71.30–80.82) | 2.98 | (2.35–3.70) | 0.37 | (0.30–0.48) | 8.02 | (5.13–12.15) |
|                  | 3.8 ≤ P          | 59.13 | (51.90–66.56) | 69.62 | (64.52–74.57) | 1.95 | (1.56–2.41) | 0.59 | (0.49–0.72) | 3.31 | (2.17–4.91)  |
|                  | 4797.0 ≤ PP × HR | 57.34 | (49.74–64.77) | 67.14 | (61.63–72.38) | 1.74 | (1.38–2.15) | 0.64 | (0.53–0.79) | 2.75 | (1.78–4.05)  |
|                  | Alb ≤ 3.9        | 59.89 | (53.95–65.95) | 64.77 | (60.63–68.81) | 1.70 | (1.46–2.00) | 0.62 | (0.53–0.74) | 2.75 | (2.03–3.78)  |
|                  | Hb ≤ 12.2        | 65.74 | (60.01–71.86) | 65.92 | (61.78–69.91) | 1.93 | (1.65–2.24) | 0.52 | (0.43–0.63) | 3.71 | (2.68–5.18)  |
|                  | 92 ≤ iPTH        | 68.10 | (62.06–74.57) | 73.02 | (68.91–77.20) | 2.52 | (2.11–3.02) | 0.44 | (0.36–0.54) | 5.78 | (3.98–8.25)  |
| BMI ≥ 25, female | e24hUK ≤ 39.8    | 48.56 | (42.22–55.33) | 59.26 | (54.58–63.86) | 1.19 | (1.01–1.44) | 0.87 | (0.75–1.01) | 1.37 | (1.00–1.93)  |
|                  | 896.6 ≤ UACR     | 73.26 | (67.75–78.70) | 78.34 | (74.48–82.32) | 3.38 | (2.73–4.06) | 0.34 | (0.28–0.43) | 9.91 | (6.66–13.98) |
|                  | 3.7 ≤ P          | 56.16 | (49.93–62.23) | 69.87 | (65.48–74.27) | 1.86 | (1.53–2.24) | 0.63 | (0.54–0.74) | 2.97 | (2.09–4.12)  |
|                  | 4209.0 ≤ PP × HR | 59.65 | (53.28–66.07) | 59.39 | (54.68–63.58) | 1.47 | (1.24–1.73) | 0.68 | (0.57–0.83) | 2.16 | (1.51–3.04)  |
|                  | Alb ≤ 3.9        | 67.62 | (56.52–79.36) | 59.54 | (52.34–67.24) | 1.67 | (1.30–2.17) | 0.54 | (0.39–0.84) | 3.07 | (1.60–5.65)  |
|                  | Hb ≤ 11.2        | 64.12 | (52.26–76.34) | 71.33 | (64.49–77.96) | 2.24 | (1.64–2.99) | 0.50 | (0.37–0.76) | 4.45 | (2.28–8.02)  |
|                  | 104 ≤ iPTH       | 69.78 | (59.25–80.40) | 72.86 | (65.53–80.21) | 2.57 | (1.81–3.47) | 0.41 | (0.30–0.64) | 6.20 | (3.13–11.31) |

|                       |                  |       |               |       |               |      |             |      |             |       |              |
|-----------------------|------------------|-------|---------------|-------|---------------|------|-------------|------|-------------|-------|--------------|
| BMI ≥ 25, male        | e24hUK ≤ 42.3    | 71.93 | (61.05–83.81) | 44.39 | (36.79–51.68) | 1.29 | (1.05–1.62) | 0.63 | (0.42–1.06) | 2.05  | (1.02–3.83)  |
|                       | 910.9 ≤ UACR     | 79.11 | (70.13–88.04) | 81.80 | (75.26–88.37) | 4.35 | (2.79–6.02) | 0.26 | (0.18–0.44) | 17.02 | (7.56–31.89) |
|                       | 4.0 ≤ P          | 67.53 | (55.38–80.05) | 76.06 | (69.50–83.07) | 2.82 | (1.97–3.89) | 0.43 | (0.30–0.67) | 6.61  | (3.08–12.29) |
|                       | 4628.0 ≤ PP × HR | 54.54 | (41.47–67.32) | 58.95 | (51.23–66.84) | 1.33 | (0.98–1.84) | 0.77 | (0.57–1.12) | 1.72  | (0.88–3.20)  |
|                       | Alb ≤ 3.9        | 57.17 | (50.17–64.27) | 67.39 | (62.29–72.57) | 1.75 | (1.42–2.16) | 0.64 | (0.53–0.77) | 2.76  | (1.89–4.04)  |
|                       | Hb ≤ 12.8        | 74.84 | (68.60–80.86) | 64.84 | (59.34–69.89) | 2.13 | (1.76–2.50) | 0.39 | (0.31–0.52) | 5.49  | (3.51–7.99)  |
|                       | 88 ≤ iPTH        | 70.96 | (63.98–78.15) | 74.32 | (69.31–79.41) | 2.76 | (2.17–3.43) | 0.39 | (0.31–0.52) | 7.07  | (4.32–11.00) |
| BMI ≥ 25, Age < 65    | e24hUK ≤ 39.6    | 47.81 | (39.94–55.17) | 62.82 | (57.32–68.21) | 1.29 | (1.02–1.60) | 0.83 | (0.70–1.00) | 1.55  | (1.02–2.28)  |
|                       | 896.6 ≤ UACR     | 71.11 | (64.23–77.79) | 76.93 | (71.92–81.94) | 3.08 | (2.38–3.88) | 0.38 | (0.30–0.50) | 8.21  | (5.12–12.63) |
|                       | 3.5 ≤ P          | 56.14 | (48.57–63.31) | 69.70 | (64.14–75.39) | 1.85 | (1.44–2.32) | 0.63 | (0.53–0.78) | 2.94  | (1.89–4.34)  |
|                       | 4267.9 ≤ PP × HR | 57.12 | (49.72–64.99) | 67.06 | (61.98–72.67) | 1.73 | (1.38–2.17) | 0.64 | (0.53–0.79) | 2.71  | (1.79–4.08)  |
|                       | Alb ≤ 3.9        | 63.72 | (56.20–71.76) | 64.88 | (59.40–70.69) | 1.81 | (1.47–2.24) | 0.56 | (0.45–0.72) | 3.24  | (2.09–4.90)  |
|                       | Hb ≤ 12.5        | 65.23 | (58.01–73.20) | 64.54 | (58.93–70.01) | 1.84 | (1.50–2.26) | 0.54 | (0.43–0.69) | 3.42  | (2.23–5.23)  |
|                       | 88 ≤ iPTH        | 69.54 | (61.70–77.49) | 71.39 | (66.10–76.96) | 2.43 | (1.91–3.03) | 0.43 | (0.33–0.58) | 5.70  | (3.45–8.90)  |
| BMI ≥ 25, Age ≥ 65    | e24hUK ≤ 43.4    | 66.00 | (58.38–74.59) | 43.36 | (37.54–49.17) | 1.17 | (0.98–1.40) | 0.78 | (0.59–1.07) | 1.49  | (0.93–2.38)  |
|                       | 896.6 ≤ UACR     | 77.73 | (70.75–85.09) | 75.02 | (69.71–80.51) | 3.11 | (2.40–3.88) | 0.30 | (0.22–0.43) | 10.48 | (6.15–16.92) |
|                       | 3.8 ≤ P          | 52.58 | (44.37–60.79) | 74.67 | (69.41–80.17) | 2.08 | (1.59–2.69) | 0.64 | (0.53–0.79) | 3.27  | (2.09–5.02)  |
|                       | 4209.0 ≤ PP × HR | 52.05 | (43.46–60.72) | 66.69 | (60.99–72.54) | 1.56 | (1.21–2.01) | 0.72 | (0.59–0.89) | 2.17  | (1.37–3.37)  |
|                       | Alb ≤ 3.9        | 54.38 | (45.01–63.65) | 64.61 | (57.42–71.73) | 1.54 | (1.15–2.03) | 0.71 | (0.56–0.92) | 2.18  | (1.26–3.61)  |
|                       | Hb ≤ 11.4        | 62.02 | (52.88–71.65) | 76.73 | (70.57–82.79) | 2.67 | (1.90–3.55) | 0.49 | (0.39–0.66) | 5.39  | (3.05–8.93)  |
|                       | 92 ≤ iPTH        | 69.80 | (60.55–78.83) | 72.15 | (65.58–78.82) | 2.51 | (1.87–3.27) | 0.42 | (0.31–0.61) | 5.99  | (3.36–10.28) |
| BMI ≥ 25, CKD stage 3 | e24hUK ≤ 39.6    | 55.33 | (45.90–65.48) | 53.13 | (45.99–60.26) | 1.18 | (0.92–1.55) | 0.84 | (0.64–1.11) | 1.40  | (0.83–2.45)  |
|                       | 795.4 ≤ UACR     | 71.88 | (63.28–80.98) | 81.20 | (74.84–87.41) | 3.82 | (2.56–5.26) | 0.35 | (0.26–0.50) | 11.04 | (5.64–19.37) |
|                       | 3.7 ≤ P          | 57.88 | (48.49–67.09) | 69.94 | (63.12–76.86) | 1.93 | (1.41–2.52) | 0.60 | (0.48–0.80) | 3.20  | (1.85–5.15)  |
|                       | 4731.4 ≤ PP × HR | 60.58 | (50.15–71.27) | 66.88 | (60.35–73.85) | 1.83 | (1.39–2.41) | 0.59 | (0.45–0.82) | 3.10  | (1.76–5.27)  |
|                       | Alb ≤ 3.9        | 67.44 | (55.29–80.78) | 65.51 | (60.53–70.82) | 1.96 | (1.53–2.54) | 0.50 | (0.35–0.79) | 3.93  | (1.96–7.28)  |
|                       | Hb ≤ 12.9        | 55.82 | (42.60–68.76) | 63.48 | (58.16–68.99) | 1.53 | (1.17–2.07) | 0.70 | (0.53–1.01) | 2.20  | (1.18–3.92)  |
|                       | 61 ≤ iPTH        | 59.14 | (45.44–73.27) | 53.34 | (47.80–58.53) | 1.27 | (0.99–1.71) | 0.77 | (0.56–1.16) | 1.65  | (0.86–3.07)  |

|                         |                  |       |               |       |               |      |             |      |             |       |              |
|-------------------------|------------------|-------|---------------|-------|---------------|------|-------------|------|-------------|-------|--------------|
| BMI ≥ 25, CKD stage 4–5 | e24hUK ≤ 43.4    | 58.32 | (44.23–72.85) | 47.20 | (41.68–52.88) | 1.10 | (0.86–1.51) | 0.88 | (0.63–1.39) | 1.25  | (0.62–2.40)  |
|                         | 1159.0 ≤ UACR    | 76.01 | (63.34–88.25) | 85.18 | (81.07–89.34) | 5.13 | (3.59–6.85) | 0.28 | (0.19–0.60) | 18.22 | (6.96–34.37) |
|                         | 3.7 ≤ P          | 38.98 | (24.51–53.50) | 77.17 | (71.95–82.33) | 1.71 | (1.14–2.87) | 0.79 | (0.63–1.04) | 2.16  | (1.11–4.57)  |
|                         | 4209.0 ≤ PP × HR | 58.91 | (44.17–74.40) | 62.80 | (57.13–68.36) | 1.58 | (1.18–2.22) | 0.65 | (0.47–1.05) | 2.42  | (1.16–4.75)  |
|                         | Alb ≤ 3.9        | 58.11 | (51.51–64.67) | 63.73 | (56.32–71.18) | 1.60 | (1.25–2.01) | 0.66 | (0.54–0.80) | 2.44  | (1.59–3.71)  |
|                         | Hb ≤ 11.4        | 53.91 | (46.94–60.65) | 68.62 | (61.32–75.17) | 1.72 | (1.26–2.20) | 0.67 | (0.56–0.82) | 2.56  | (1.57–3.90)  |
|                         | 109 ≤ iPTH       | 69.79 | (63.52–76.21) | 64.57 | (56.87–72.40) | 1.97 | (1.52–2.48) | 0.47 | (0.37–0.61) | 4.21  | (2.58–6.58)  |
|                         | e24hUK ≤ 37.3    | 41.06 | (34.02–48.12) | 62.93 | (55.36–70.46) | 1.11 | (0.83–1.46) | 0.94 | (0.78–1.11) | 1.18  | (0.76–1.88)  |
| BMI ≥ 25, Non-DM        | 894.8 ≤ UACR     | 71.99 | (65.67–78.72) | 74.65 | (67.57–81.87) | 2.84 | (2.04–3.74) | 0.38 | (0.29–0.50) | 7.57  | (4.32–12.28) |
|                         | 3.9 ≤ P          | 53.07 | (45.95–59.50) | 72.45 | (65.39–79.68) | 1.93 | (1.36–2.53) | 0.65 | (0.55–0.79) | 2.97  | (1.76–4.62)  |
|                         | 4395.3 ≤ PP × HR | 54.54 | (47.39–62.10) | 60.06 | (52.36–68.30) | 1.37 | (1.06–1.77) | 0.76 | (0.60–0.95) | 1.80  | (1.12–2.96)  |
|                         | Alb ≤ 3.9        | 52.20 | (41.63–62.29) | 69.10 | (63.68–74.54) | 1.69 | (1.29–2.24) | 0.69 | (0.56–0.89) | 2.44  | (1.49–4.00)  |
|                         | Hb ≤ 12.7        | 74.95 | (66.06–84.24) | 62.50 | (56.74–67.94) | 2.00 | (1.63–2.43) | 0.40 | (0.29–0.64) | 4.99  | (2.66–8.50)  |
|                         | 85 ≤ iPTH        | 73.76 | (64.08–83.91) | 71.46 | (66.27–77.08) | 2.58 | (2.04–3.31) | 0.37 | (0.26–0.59) | 7.04  | (3.65–12.62) |
|                         | e24hUK ≤ 39.8    | 57.58 | (47.01–68.78) | 58.59 | (52.60–64.91) | 1.39 | (1.11–1.81) | 0.72 | (0.56–0.98) | 1.92  | (1.14–3.26)  |
|                         | 696.7 ≤ UACR     | 68.83 | (58.91–78.62) | 74.64 | (69.27–80.52) | 2.71 | (2.04–3.47) | 0.42 | (0.31–0.62) | 6.50  | (3.51–10.67) |
| BMI ≥ 25, DM            | 3.5 ≤ P          | 58.09 | (47.01–68.78) | 60.90 | (55.02–66.90) | 1.49 | (1.17–1.93) | 0.69 | (0.53–0.94) | 2.16  | (1.26–3.63)  |
|                         | 3763.4 ≤ PP × HR | 58.85 | (48.10–70.63) | 49.38 | (43.25–55.39) | 1.16 | (0.94–1.50) | 0.83 | (0.62–1.16) | 1.40  | (0.82–2.42)  |
|                         | Alb ≤ 3.9        | 64.40 | (57.19–71.34) | 59.09 | (52.64–65.74) | 1.57 | (1.28–1.93) | 0.60 | (0.48–0.78) | 2.61  | (1.68–4.00)  |
|                         | Hb ≤ 12.2        | 67.52 | (60.38–74.78) | 58.81 | (51.91–65.77) | 1.64 | (1.33–2.00) | 0.55 | (0.43–0.73) | 2.97  | (1.86–4.63)  |
|                         | 109 ≤ iPTH       | 60.02 | (52.56–67.77) | 79.91 | (74.24–85.81) | 2.99 | (2.12–4.07) | 0.50 | (0.41–0.62) | 5.97  | (3.58–9.68)  |
|                         | e24hUK ≤ 39.2    | 42.57 | (34.28–50.57) | 62.89 | (56.33–69.84) | 1.15 | (0.88–1.52) | 0.91 | (0.76–1.11) | 1.26  | (0.79–1.99)  |
|                         | 888.8 ≤ UACR     | 81.99 | (75.86–88.26) | 74.51 | (68.34–80.88) | 3.22 | (2.42–4.10) | 0.24 | (0.18–0.37) | 13.31 | (7.43–21.97) |
|                         | 3.9 ≤ P          | 54.04 | (45.89–61.71) | 76.98 | (71.02–83.35) | 2.35 | (1.69–3.14) | 0.60 | (0.50–0.74) | 3.93  | (2.40–6.21)  |
|                         | 4387.7 ≤ PP × HR | 63.08 | (55.94–70.91) | 56.00 | (48.98–63.14) | 1.43 | (1.17–1.75) | 0.66 | (0.52–0.84) | 2.17  | (1.43–3.35)  |

Cut-off values in all cohorts for predicting an eGFR decline by ≥ 50% from baseline or ESRD that requires renal replacement therapy during the follow-up examination period were examined by ROC analyses. Abbreviations: CI, confidence interval; BMI, body mass index; CKD, chronic kidney disease; DM, diabetes mellitus; Alb, Albumin; Hb, Hemoglobin; iPTH, intact parathyroid hormone; e24hUK, estimated 24-hour urinary potassium excretion; UACR, urine albumin-to-creatinine ratio; P, serum phosphorus; PP × HR, pulse pressure x heart rate
